# Supplementary material
Source: Research Square preprint supplement (doi:10.21203/rs.3.rs-9148549/v1)
Supplement: Supplementary file 1 [file 9e4f02d6155a5b66bd01d7f3.xlsx]

## Sheet: 筛选后数据文件
id.exposure	id.outcome	outcome	exposure	method	nsnp	b	se	pval	hetero_Q	hetero_Q_df	hetero_Q_pval	intercept	intercept_se	intercept_pval	or	or_lci95	or_uci95	fdr
mYJmyZ	aGwo0E	outcome	ZWILCH	Weighted median	340	-0.0796069	0.08173594598606	0.330080138890875							0.923479270220701	0.78677782181091	1.08393238711846	0.393602440299925
iUYFMA	aGwo0E	outcome	ZW10	Weighted median	25	1.2445099406794	0.354222480555973	0.0004424829479654							3.47123327222725	1.73366	6.95030819063025	0.000823289585656
TkN6ID	aGwo0E	outcome	ZSWIM6	Weighted median	25	1.54805015849937	0.296894081925447	1.84662400035239e-07							4.70229251290808	2.62777572896272	8.41455175692623	4.64528568101273e-07
MV0QAb	aGwo0E	outcome	ZSCAN5A	Weighted median	13	-1.63531	0.599747304244821	0.0063978800343937							0.194892457408834	0.0601561204068476	0.631408237399073	0.0103698972224133
QuiLG7	aGwo0E	outcome	ZSCAN31	Weighted median	5	-1.00513	0.962590365740107	0.296396506547357							0.365997313403742	0.0554759102012263	2.41463426076055	0.357561941125197
2v7K9H	aGwo0E	outcome	ZSCAN22	Weighted median	41	-0.3284	0.226912158094431	0.147825067011603							0.720074845380927	0.461557817903583	1.12338641625756	0.191730159768292
NBkxy5	aGwo0E	outcome	ZSCAN21	Weighted median	735	-0.158657	0.038026535604718	3.01563708980213e-05							0.853288610920203	0.792003513917387	0.919315938290241	6.30369464108889e-05
y4SxtX	aGwo0E	outcome	ZSCAN2	Weighted median	612	-0.328516	0.0445525225966443	1.65993356034338e-13							0.719991685845226	0.659786778678928	0.785690232720643	6.08260626625458e-13
bwF3vd	aGwo0E	outcome	ZSCAN16	Weighted median	1227	0.667239377809278	0.0269132764259695	1.08807913523132e-135							1.94884984953031	1.84871232465497	2.05441143295409	7.03591276411423e-134
CJVGjs	aGwo0E	outcome	ZRANB3	Weighted median	839	0.835833071315275	0.0608439911308485	6.06848903428612e-43							2.3067349227593	2.04741669292006	2.59889744099352	6.606469011917959e-42
E2QCoL	aGwo0E	outcome	ZNRF3	Weighted median	374	-0.296182	0.0900494245867762	0.0010050838628035							0.743652411354843	0.623330492969688	0.887200153291339	0.0017969152127559
0CORdx	aGwo0E	outcome	ZNFX1	Weighted median	1051	-0.395997	0.0227010647174552	3.8233163570409304e-68							0.673008417457185	0.643719936359145	0.703629489137835	7.67194549093798e-67
jocCRr	aGwo0E	outcome	ZNF891	Weighted median	183	0.801473057188797	0.079964927327997	1.21015846794056e-23							2.22882169334002	1.90549496623614	2.60701089676217	7.03441096501557e-23
K6yhNS	aGwo0E	outcome	ZNF888	Weighted median	48	-0.0399027	0.0970075881809121	0.680826200136315							0.960882918860588	0.794503742203514	1.16210400872038	0.734577984741294
Ub8YRl	aGwo0E	outcome	ZNF879	Weighted median	326	0.182888518137193	0.0408885745100991	7.7183412896552e-06							1.20068054651544	1.10821089880861	1.30086590587627	1.70257731172011e-05
4xtNqw	aGwo0E	outcome	ZNF865	Weighted median	26	0.494824599022946	0.453601636256115	0.275326032002928							1.64021051929696	0.674195865914778	3.99036939207881	0.334981700752141
mWHU6l	aGwo0E	outcome	ZNF860	Weighted median	103	-1.11042	0.154464217106529	6.53443570298136e-13							0.329421083614278	0.243370982542023	0.44589642198148	2.3177823595231797e-12
FnKtn1	aGwo0E	outcome	ZNF852	Weighted median	241	0.437067956782325	0.086130459661106	3.88541394617366e-07							1.54816128154083	1.3076769675732	1.8328711242121	9.5512317849837e-07
FJVGYV	aGwo0E	outcome	ZNF845	Weighted median	121	0.253810110251114	0.0921707188389787	0.0058926532320805							1.2889270269987	1.0759	1.54413629114756	0.0095988771967975
eVjOZb	aGwo0E	outcome	ZNF844	Weighted median	132	-0.065171	0.119279246590012	0.584809526576337							0.936907269829327	0.741590340581732	1.18366594631002	0.646512375614276
MrWMgr	aGwo0E	outcome	ZNF841	Weighted median	492	-0.238792	0.0654578147608519	0.0002642630375585							0.787578838070797	0.692747905716355	0.895391268683127	0.0005038355528135
ZkGOAS	aGwo0E	outcome	ZNF836	Weighted median	72	0.0542915941601606	0.16554842581623	0.742949523070339							1.05579	0.76323956409876	1.46048198617894	0.79035175039285
tLs2if	aGwo0E	outcome	ZNF830	Weighted median	134	1.03458183359863	0.162730244836967	2.04864469733014e-10							2.81392929887488	2.04547605823938	3.87107835712435	6.29253879521268e-10
jSxyx4	aGwo0E	outcome	ZNF83	Weighted median	958	-0.0716615	0.0139053216653517	2.55622641597875e-07							0.930845888601058	0.905818812574172	0.95656444345987	6.36614677766789e-07
Dx5xv9	aGwo0E	outcome	ZNF821	Weighted median	15	-0.695895	0.738916081018906	0.346306349882092							0.498628049597851	0.11716520031649	2.12204589053875	0.410198825242759
ij0ubD	aGwo0E	outcome	ZNF808	Weighted median	124	-0.478567	0.0747381618320948	1.5210438044836701e-10							0.61967068636219	0.535232583911544	0.71742971388313	4.705919781619901e-10
4PqhSm	aGwo0E	outcome	ZNF804A	Weighted median	150	0.252673047375759	0.151588989562844	0.0955482499695634							1.28746226884614	0.956531677828816	1.73288468340625	0.128655497226665
1gjsRV	aGwo0E	outcome	ZNF800	Weighted median	705	0.106755954137602	0.0393013576013433	0.0066007561940378							1.11266268061899	1.03017150000355	1.20175935835728	0.0106752597064867
9SxZH3	aGwo0E	outcome	ZNF799	Weighted median	170	-0.694115	0.0910929665481892	2.5397507838693102e-14							0.499516555587412	0.4178399763068	0.597158729309098	9.70989846583313e-14
CVNObi	aGwo0E	outcome	ZNF793	Weighted median	1465	-0.0184964	0.0207615209650221	0.37298304559829							0.981673578855977	0.942528603667775	1.02244431805444	0.437985343863762
tS89XN	aGwo0E	outcome	ZNF791	Weighted median	144	0.194682346257209	0.0612680502473879	0.0014852463302739							1.21492499971453	1.07744981636541	1.36994107058325	0.002602341624859
LdCZVt	aGwo0E	outcome	ZNF782	Weighted median	11	-0.411076	0.545060660347434	0.45073876330253							0.662936539053949	0.227775472373126	1.92946523273101	0.516799274123535
p0mzyn	aGwo0E	outcome	ZNF780A	Weighted median	570	0.265132197026389	0.0469272356935086	1.60580847295448e-08							1.30360329686739	1.18905017371781	1.4291924707349	4.36200340844395e-08
q0P3XS	aGwo0E	outcome	ZNF766	Weighted median	118	0.50773536653948	0.1741901356802	0.0035587753927405							1.66152418783942	1.18095413485547	2.33765439765642	0.0059598027365274
zt2PLa	aGwo0E	outcome	ZNF763	Weighted median	334	-0.107029	0.0476566334614396	0.0247140806133253							0.898499341400705	0.818373612756535	0.986470059534619	0.036815514550118
4h2ZuU	aGwo0E	outcome	ZNF749	Weighted median	4	2.24325461104355	1.76718905834359	0.204301498257865							9.42395273060035	0.295101491357531	300.950309197152	0.256880886677186
eIEdoD	aGwo0E	outcome	ZNF740	Weighted median	79	0.985500247638017	0.138663002049051	1.18454429760865e-12							2.6791517886053	2.04157335617821	3.51584442688053	4.1412527021980094e-12
mHqOU8	aGwo0E	outcome	ZNF74	Weighted median	302	0.111582781165865	0.0572443579194744	0.0512672102589434							1.11804629335046	0.999384029431506	1.25079796881063	0.0724430521258103
QLrLYR	aGwo0E	outcome	ZNF732	Weighted median	124	-0.375722	0.094584262587277	7.11669519747796e-05							0.686793354139835	0.570577095986754	0.826680766908309	0.0001436159032886
eqmUag	aGwo0E	outcome	ZNF720	Weighted median	439	-0.111778	0.0290738047912089	0.0001207397497856							0.894243016530938	0.844709609937592	0.94668104068738	0.0002381295005254
ImjlGd	aGwo0E	outcome	ZNF718	Weighted median	342	0.108688768664926	0.02467399181993	1.0578714716187e-05							1.11481533087879	1.06218461487915	1.17005387251236	2.30411887454274e-05
jneqZU	aGwo0E	outcome	ZNF706	Weighted median	29	-0.279497	0.375473618033102	0.456643514512896							0.756164013944426	0.362248344436381	1.57843099841955	0.522792907570462
atcRG3	aGwo0E	outcome	ZNF704	Weighted median	97	-0.954179	0.168384983573587	1.45615370999198e-08							0.385128219334972	0.276868246401527	0.535719596797027	3.96616836116076e-08
r9zayQ	aGwo0E	outcome	ZNF700	Weighted median	158	0.104169523281962	0.23716158363699	0.660491709578165							1.1097885739712	0.697211005172538	1.76651066862065	0.716094364963463
d2XObZ	aGwo0E	outcome	ZNF70	Weighted median	134	-0.342369	0.147728507313577	0.0204736613448033							0.710086452542692	0.531572105337466	0.948550093245696	0.0308908863395937
SWhjUR	aGwo0E	outcome	ZNF699	Weighted median	17	2.35236870790596	0.655591614384606	0.0003330177663104							10.5104364159703	2.90783594701847	37.9902015336953	0.0006278460047716
BFe8Hb	aGwo0E	outcome	ZNF692	Weighted median	18	-1.7441	0.456437396023405	0.0001328534858327							0.174802841918488	0.0714531096161393	0.427637561289258	0.0002609478673901
68BLmk	aGwo0E	outcome	ZNF691	Weighted median	63	0.765468200621331	0.214490349537253	0.0003586516926091							2.15000077073592	1.41208468929732	3.27353121891387	0.0006737060672991
6owUhY	aGwo0E	outcome	ZNF69	Weighted median	95	0.860428424305158	0.301529746133302	0.004323452839239							2.36417334609093	1.30921814333221	4.26920115553921	0.0071615042895109
naIwqn	aGwo0E	outcome	ZNF684	Weighted median	56	0.302173124525509	0.212280554136796	0.154602512779546							1.3527954085008	0.892350075936759	2.05082676251214	0.199707881784492
QKpjgu	aGwo0E	outcome	ZNF678	Weighted median	177	0.774169132022176	0.116789709651202	3.38554255144417e-11							2.16878940070961	1.72505908333562	2.7266587620496	1.08664214311978e-10
3sn3Xh	aGwo0E	outcome	ZNF675	Weighted median	511	0.334466566993609	0.0704718451921586	2.07374144054036e-06							1.39719487653717	1.2169427249607	1.60414576872117	4.80845998249391e-06
QWQLRd	aGwo0E	outcome	ZNF672	Weighted median	184	-0.560591	0.156100295976565	0.00032912711126							0.570871400026146	0.420400313746812	0.775199600740744	0.000620961110467
XukWhd	aGwo0E	outcome	ZNF669	Weighted median	964	0.0822410497438235	0.0292751219650312	0.0049657525828236							1.08571749021217	1.02517344272722	1.1498371099204	0.0081654598205711
PAgnyz	aGwo0E	outcome	ZNF665	Weighted median	182	0.332104415629535	0.0668595942847165	6.79294626445793e-07							1.39389838569166	1.22269765567489	1.58907044649673	1.63903259732852e-06
SH2Y4V	aGwo0E	outcome	ZNF662	Weighted median	11	-0.623898	0.448001138864883	0.163732962783098							0.535851630261701	0.222688755515128	1.28940937763073	0.210445652896255
squEAn	aGwo0E	outcome	ZNF655	Weighted median	338	-1.56556	0.141762655217032	2.35651745498829e-28							0.208971603077878	0.158276510209838	0.275904054461668	1.62528314712811e-27
wTkbGV	aGwo0E	outcome	ZNF653	Weighted median	55	1.92677327361787	0.454600370849473	2.25129305739626e-05							6.86731550455381	2.81723680094023	16.7398147799808	4.75850900246214e-05
7to3fT	aGwo0E	outcome	ZNF652	Weighted median	139	0.457408016285514	0.137420236796957	0.0008730415216412							1.57997340763347	1.2069111801962	2.06835101852576	0.0015715956235841
8euQjf	aGwo0E	outcome	ZNF649	Weighted median	493	-0.0881897	0.07039050997928	0.210255288830543							0.915587155288491	0.797594369790255	1.05103530150259	0.263648967818044
7gTdnz	aGwo0E	outcome	ZNF639	Weighted median	104	-1.01585	0.11744785098917	5.17830540301814e-18							0.36209441158082	0.287639280072712	0.455822177224599	2.3704950132070502e-17
EtOGsL	aGwo0E	outcome	ZNF627	Weighted median	490	-0.11518	0.0528357167319577	0.0292594533595774							0.891205317824925	0.803531856370666	0.988444841635554	0.0430696851892975
opIiiG	aGwo0E	outcome	ZNF619	Weighted median	367	0.559984243227041	0.0476299638722353	6.50231982418085e-32							1.75064491556431	1.59461051315464	1.92194745682952	5.08281813724694e-31
x9RRhW	aGwo0E	outcome	ZNF618	Weighted median	39	-1.22092	0.237031620724057	2.59249322338827e-07							0.294957360702559	0.185350537457522	0.469380050503268	6.45321422457051e-07
fhsYh2	aGwo0E	outcome	ZNF615	Weighted median	173	0.245680818747555	0.134194119371949	0.0671323753666603							1.27849143791219	0.982809811453067	1.6631298729081	0.0930018995608401
ZTdmVx	aGwo0E	outcome	ZNF614	Weighted median	220	0.555450457206488	0.113837873762935	1.0645676342428e-06							1.74272583140058	1.39421038761081	2.17836084884963	2.52910963378201e-06
3gkceg	aGwo0E	outcome	ZNF613	Weighted median	1099	0.0394064795414945	0.0219527041725627	0.0726437171746765							1.04019321498961	0.99638572662977	1.08592676068358	0.0999949166781985
VNRJ2C	aGwo0E	outcome	ZNF611	Weighted median	123	-0.446193	0.108115153083478	3.67499514720161e-05							0.64006019275347	0.51783492976411	0.791134446133693	7.61527558647712e-05
KdxL8Q	aGwo0E	outcome	ZNF610	Weighted median	153	0.291001127750346	0.162733819439388	0.073743239055999							1.33776609261536	0.972430026414867	1.84035670427546	0.101401058758726
aliS8z	aGwo0E	outcome	ZNF609	Weighted median	220	0.0881691647850905	0.186477909434216	0.636346655927702							1.09217286358962	0.757806246337486	1.57407196064511	0.69432507658967
oaNSzb	aGwo0E	outcome	ZNF587	Weighted median	325	0.790961635051277	0.0668293798517441	2.55700000663487e-32							2.20551630860451	1.93474599772888	2.51418128954936	2.02603803252257e-31
rmzlO3	aGwo0E	outcome	ZNF581	Weighted median	214	0.982994997979741	0.10103449289527	2.2614143195512003e-22							2.67244824503365	2.19233545168501	3.25770384130503	1.24897318757728e-21
wy8nWH	aGwo0E	outcome	ZNF580	Weighted median	92	1.72685958986818	0.224442112745346	1.42595244216922e-14							5.62296772721088	3.62173447883413	8.73000664351108	5.5304073245789103e-14
Q489rE	aGwo0E	outcome	ZNF579	Weighted median	148	-0.478929	0.0778026692517318	7.47547918313782e-10							0.619446748811814	0.531835115114424	0.721491048087284	2.21622118389677e-09
xM0fBU	aGwo0E	outcome	ZNF577	Weighted median	648	-0.119447	0.0524723928594478	0.0228231109928624							0.887410817372656	0.800680618290071	0.983535683019008	0.0341851909280654
8RnXb1	aGwo0E	outcome	ZNF574	Weighted median	107	-2.03046	0.17004809071459	7.27568785229027e-33							0.131274521532182	0.0940659805648907	0.183201194523404	5.88379124188404e-32
6cA4Tx	aGwo0E	outcome	ZNF573	Weighted median	1748	-0.182203	0.0167767450689151	1.77919923110508e-27							0.833432490256767	0.806472890375438	0.861293323191847	1.18941515039627e-26
BdUJkc	aGwo0E	outcome	ZNF572	Weighted median	4	-0.563887	1.29589160890935	0.663465014685623							0.568993215326463	0.0448767999691801	7.21426838165578	0.718781652168019
tHG7yA	aGwo0E	outcome	ZNF570	Weighted median	4	-0.556553	0.908244783010198	0.540022804648066							0.57318148680065	0.0966448213517455	3.39942701756641	0.604101484050687
LRfY1R	aGwo0E	outcome	ZNF568	Weighted median	687	0.346570421953956	0.0424834156424227	3.41234108830016e-16							1.41420908169057	1.30122083456188	1.53700837983391	1.4344782742111402e-15
RvnXbx	aGwo0E	outcome	ZNF567	Weighted median	359	0.766400865851531	0.0624119562345871	1.16411508767121e-34							2.15200693709507	1.90422181990016	2.43203486532263	9.98104437282557e-34
8dZlxT	aGwo0E	outcome	ZNF565	Weighted median	1253	0.0470027518386377	0.0275406708842623	0.0878839798476988							1.04812489334627	0.993047319406971	1.10625724533264	0.119199765440805
VPwi2J	aGwo0E	outcome	ZNF564	Weighted median	21	0.238502993163218	0.241011823719197	0.322374351763739							1.26934750539499	0.791456641499521	2.03579451478195	0.385343820473844
KZuzZN	aGwo0E	outcome	ZNF563	Weighted median	18	-0.691391	0.507211811083718	0.172844124002414							0.500878620203784	0.185346796691905	1.3535674565462	0.221011964439674
uxf07J	aGwo0E	outcome	ZNF554	Weighted median	211	-0.0490688	0.0502771825485409	0.329081308829194							0.95211560169476	0.862765717720673	1.05071875292577	0.392534560689781
5QU5zu	aGwo0E	outcome	ZNF550	Weighted median	529	-0.035035	0.0299652384953506	0.24232732855958							0.965571582621494	0.910494967652525	1.02397982887258	0.29916528007669
tuHys9	aGwo0E	outcome	ZNF542	Weighted median	182	0.579164794897075	0.0928839507626689	4.5074267322551003e-10							1.78454734510654	1.48752289721106	2.14088081124504	1.35376255610432e-09
ROj9fW	aGwo0E	outcome	ZNF541	Weighted median	9	-0.717896	0.763692130985449	0.347200615159793							0.487777542414373	0.109182726599943	2.17916275122525	0.411159499274636
aQlMjj	aGwo0E	outcome	ZNF532	Weighted median	375	0.178878276791343	0.0393311588693114	5.41570481094684e-06							1.19587516954537	1.10715006588147	1.29171055054453	1.21064282703713e-05
JLhb8j	aGwo0E	outcome	ZNF530	Weighted median	162	1.49913209801094	0.151693266857567	4.9504014839024996e-23							4.47780109091615	3.32614273568978	6.0282147229174	2.80786090136895e-22
GYSodi	aGwo0E	outcome	ZNF529	Weighted median	1518	-0.176689	0.0265687605648334	2.92570584475941e-11							0.838040178253728	0.795516249254194	0.882837202918187	9.43402165972515e-11
EO6lQi	aGwo0E	outcome	ZNF528	Weighted median	333	0.120719172978924	0.0789968454126819	0.126474848255997							1.12830800849496	0.966460699336702	1.31725890448272	0.166101415008933
ghx9l1	aGwo0E	outcome	ZNF521	Weighted median	6	2.04608347745063	0.684012569130922	0.0027779685519926							7.73753744525693	2.02469453436756	29.5696386296879	0.0047145304147748
2QlWdE	aGwo0E	outcome	ZNF519	Weighted median	314	0.0189457515317032	0.0476546501693626	0.690951938942289							1.0191263610737	0.928247051070187	1.11890313967374	0.743667864307224
UMcaSf	aGwo0E	outcome	ZNF518A	Weighted median	119	2.25776169544877	0.260563279154671	4.5180388289741e-18							9.56166328244008	5.73769561145694	15.9341678119358	2.07246678057389e-17
xJS7z5	aGwo0E	outcome	ZNF514	Weighted median	1014	-0.073847	0.0129595230102463	1.21021221123821e-08							0.92881378390245	0.905518407552928	0.952708457355974	3.31254439978954e-08
Grnkyk	aGwo0E	outcome	ZNF511	Weighted median	40	0.534702276139178	0.296088488840507	0.0709360325969748							1.70693996983754	0.955394282939869	3.04967709421846	0.097851477589444
z9LFyQ	aGwo0E	outcome	ZNF510	Weighted median	83	-0.200502	0.493176988033038	0.684337518284541							0.818320032173418	0.311259385306791	2.15141360121967	0.737641577374624
BKCdE2	aGwo0E	outcome	ZNF507	Weighted median	15	-1.52854	0.805100620608753	0.0576203940651786							0.21685121350758	0.0447554958710836	1.0506966325468	0.0807391533029475
jATkXh	aGwo0E	outcome	ZNF503-AS2	Weighted median	26	-0.87225	0.234078961963801	0.0001943045502512							0.418009787617699	0.264200974917419	0.661360854549493	0.0003753510477853
YvWosJ	aGwo0E	outcome	ZNF500	Weighted median	939	0.163496	0.0206628873826448	2.52213215397551e-15							1.17762027280406	1.1308803779649	1.22629195265969	1.0146652671242e-14
rehTo4	aGwo0E	outcome	ZNF497	Weighted median	154	0.105050731099797	0.161879083032372	0.516373489395873							1.11076695935584	0.808776819826721	1.52551755657506	0.581566157451825
AO8lCP	aGwo0E	outcome	ZNF487P	Weighted median	4	-0.353757	0.763394636526091	0.643077814192288							0.702045592704334	0.157235528259301	3.13458427425371	0.700365355463639
W7NwXL	aGwo0E	outcome	ZNF484	Weighted median	366	-0.144334	0.0929944057655264	0.120644751202588							0.865598495660208	0.72136996614991	1.03866364119394	0.159193713773009
cqHXmX	aGwo0E	outcome	ZNF483	Weighted median	139	-0.0467695	0.135338503836984	0.729662860216864							0.954307365652248	0.731957416621836	1.24420154432105	0.778547640078912
cLnMSe	aGwo0E	outcome	ZNF480	Weighted median	544	-0.0532198	0.0344374799852222	0.122248703049195							0.948171580658745	0.886284510818488	1.01438007253297	0.161107922126054
762cAC	aGwo0E	outcome	ZNF462	Weighted median	14	1.28930393429085	0.510772984011826	0.0115954979681799							3.63025877745464	1.33400925550318	9.87907597861119	0.0181196389727026
qAVfOq	aGwo0E	outcome	ZNF461	Weighted median	31	-1.70456	0.325483187131066	1.63196482678363e-07							0.181852460206054	0.0960864832704018	0.344172417986508	4.12525370126852e-07
geitIu	aGwo0E	outcome	ZNF460	Weighted median	219	0.570414177876477	0.0587926137593364	2.9523973496050297e-22							1.76899958021428	1.57645815221348	1.98505714243313	1.62081660476206e-21
l2gHrZ	aGwo0E	outcome	ZNF451	Weighted median	72	-2.8682	0.333989414080607	8.87358436539693e-18							0.0568012289142674	0.0295161836052479	0.109308833734093	4.0104445009944604e-17
gO7qqG	aGwo0E	outcome	ZNF444	Weighted median	24	-0.828375	0.483365541473531	0.0865717771779027							0.436758331527513	0.169352706992277	1.12639380584213	0.117578158293331
2onZ6N	aGwo0E	outcome	ZNF443	Weighted median	68	-0.604607	0.173189302986663	0.0004811837821835							0.546289087488347	0.389045874526231	0.767086317191444	0.0008921719794038
xG0N2n	aGwo0E	outcome	ZNF441	Weighted median	205	0.336311121744431	0.0809258131766141	3.24157824182875e-05							1.39977445734213	1.19446278012059	1.64037638010758	6.75170495725223e-05
QORPco	aGwo0E	outcome	ZNF44	Weighted median	105	-0.0327289	0.21732910815987	0.880294562441612							0.967800939089274	0.632108699791976	1.48176833827841	0.906610358112592
IfDmqm	aGwo0E	outcome	ZNF439	Weighted median	481	-0.223741	0.0446844166941323	5.52446245688605e-07							0.799522064616806	0.732477536255114	0.872703257327581	1.34201218841295e-06
P3GI5j	aGwo0E	outcome	ZNF436	Weighted median	286	0.161746404558243	0.108223378792207	0.135029139335149							1.17556208633063	0.950876186493237	1.45333981274107	0.176300136650309
Y4Km8q	aGwo0E	outcome	ZNF433	Weighted median	19	0.521876462809347	0.760105731732199	0.492344889800671							1.68518687518541	0.379868259694333	7.47589389695862	0.558002170011988
Zcpr0X	aGwo0E	outcome	ZNF429	Weighted median	3133	0.152234030927518	0.0056233635394637	2.1212213911465802e-161							1.16443271781532	1.15166905043331	1.17733784181195	1.8713339354788299e-159
mYw6T6	aGwo0E	outcome	ZNF419	Weighted median	284	0.486772396717871	0.111136110045681	1.18697762257289e-05							1.62705624389067	1.30858397966049	2.02303563388453	2.57295667096523e-05
kBo239	aGwo0E	outcome	ZNF416	Weighted median	52	1.78262408444406	0.237963726866263	6.82681181147038e-14							5.94543729640362	3.7292799785703	9.47856552701593	2.54751101988119e-13
fapQ7Y	aGwo0E	outcome	ZNF415	Weighted median	541	0.224752118024474	0.0430036305831139	1.72886924532649e-07							1.25201232643458	1.15080880294744	1.36211581066236	4.36105832662062e-07
j6OezN	aGwo0E	outcome	ZNF414	Weighted median	8	-0.927475	0.75203759036626	0.217470128211147							0.395551092088285	0.0905847870216788	1.7272289486621	0.271721456890177
KNYX82	aGwo0E	outcome	ZNF404	Weighted median	578	0.35834430850737	0.0271408350192868	8.415009709400629e-40							1.43095822676193	1.35682616724485	1.50914059307653	8.42917122209082e-39
9ksYkc	aGwo0E	outcome	ZNF394	Weighted median	122	1.09054372619894	0.350767466402965	0.0018770782006404							2.97589170303334	1.49636598505572	5.91829239412502	0.0032495810472803
e8ijsO	aGwo0E	outcome	ZNF382	Weighted median	4	-2.96841	0.969348543515347	0.0021966333847521							0.051384976095514	0.0076861706191083	0.343528123324807	0.0037698978359935
YsVcz3	aGwo0E	outcome	ZNF367	Weighted median	189	-1.0307	0.107604866426363	9.836218387069149e-22							0.356755440605811	0.288918594504155	0.440520087051773	5.29460336648918e-21
mWWsDM	aGwo0E	outcome	ZNF366	Weighted median	8	-1.16386	0.851491311463748	0.171671836928442							0.312277760325547	0.0588487197347535	1.65708616998765	0.21968925682621
FzT88A	aGwo0E	outcome	ZNF354A	Weighted median	729	0.0631505779896447	0.0264091997772866	0.0167918441019556							1.06518722090635	1.01145364280402	1.12177540083469	0.0256546101610872
L39dAy	aGwo0E	outcome	ZNF35	Weighted median	643	-0.213466	0.0347743955263338	8.324710360681371e-10							0.807779282770849	0.754557165256692	0.864755381988601	2.46031147373021e-09
yegAQq	aGwo0E	outcome	ZNF346-IT1	Weighted median	31	0.0068929499162994	0.116108374371476	0.952660180638494							1.00691676097361	0.801973700656808	1.26423268331521	0.96393796014508
J2a6rS	aGwo0E	outcome	ZNF346	Weighted median	152	0.450104051229041	0.182795261773498	0.013803381598204							1.56847537879067	1.09617334569829	2.24427552770443	0.0213349329254474
vTZroO	aGwo0E	outcome	ZNF345	Weighted median	350	-1.05529	0.0876819725300513	2.31512117514949e-33							0.348092328986278	0.293128503569557	0.413362289997631	1.90686781286946e-32
C22wGM	aGwo0E	outcome	ZNF335	Weighted median	49	-0.0404102	0.219482366649224	0.853922396346616							0.960395373615864	0.624630083778382	1.47664881602149	0.884947413452872
4E9fPL	aGwo0E	outcome	ZNF333	Weighted median	969	0.0441847722612183	0.0138180627933448	0.0013857167154964							1.04517545648045	1.01725	1.07386917248288	0.0024376357675427
AN25CI	aGwo0E	outcome	ZNF331	Weighted median	508	-0.137942	0.0393985936385293	0.0004631894195581							0.871149327520624	0.806409890617603	0.941086114728104	0.0008599055614006
Z0r2jE	aGwo0E	outcome	ZNF32-AS2	Weighted median	3	-0.667798	0.572069885675354	0.243074885472498							0.512836849034697	0.167118106264505	1.57374709184157	0.299968240376634
Y6p78Q	aGwo0E	outcome	ZNF329	Weighted median	676	0.149908233869315	0.0312990381343379	1.67157720387093e-06							1.1617276305871	1.09260212199136	1.23522649325422	3.90692636133534e-06
oB7bPi	aGwo0E	outcome	ZNF302	Weighted median	542	0.101297221829121	0.0339699002002361	0.0028640010259437							1.10660550019993	1.03532585968061	1.18279256875755	0.0048513712561185
iqzPjj	aGwo0E	outcome	ZNF3	Weighted median	213	-0.503505	0.0919756222597156	4.3916163311035e-08							0.604408358852451	0.504706887853663	0.723805188798281	1.15754693275093e-07
PdY2s5	aGwo0E	outcome	ZNF296	Weighted median	5	1.57318426223728	0.653930718457588	0.0161399510754109							4.82197821655957	1.33840693744029	17.3724995519251	0.0247221034625778
xDkDcJ	aGwo0E	outcome	ZNF287	Weighted median	157	0.400542439953015	0.215115568643028	0.0626048914533633							1.49263414247793	0.979136640599844	2.27542979284885	0.0871549990833406
wbOakC	aGwo0E	outcome	ZNF285B	Weighted median	24	-0.00468829	0.24749279710963	0.984886470408125							0.995322683856959	0.612764758398582	1.61671707033097	0.988658620725165
tgGbmM	aGwo0E	outcome	ZNF283	Weighted median	98	1.0329321684039	0.148614174590469	3.64178794652904e-12							2.80929108445244	2.09939327476557	3.75923677190269	1.2368709605553e-11
XPoysa	aGwo0E	outcome	ZNF281	Weighted median	490	0.0522141019805117	0.0178273722726981	0.0034019383861309							1.05360129649097	1.01742248368913	1.09106660189224	0.0057126431709729
06tqqG	aGwo0E	outcome	ZNF280B	Weighted median	34	0.690127308384318	0.257835565414293	0.0074369378781196							1.99396936610359	1.20294125073983	3.30516043947642	0.0119462540072426
HZK0XA	aGwo0E	outcome	ZNF268	Weighted median	236	0.0162173014837663	0.0568155261856646	0.775308715113178							1.01634951566963	0.909244603867217	1.13607090282248	0.818738509698744
6NZ79E	aGwo0E	outcome	ZNF263	Weighted median	63	0.680221104515822	0.100687479870536	1.42082073907415e-11							1.97431421376297	1.62072510368289	2.40504488133673	4.6658340183781097e-11
lVSITk	aGwo0E	outcome	ZNF260	Weighted median	1427	-0.33271	0.0260302231017847	2.0756609507109502e-37							0.716978299851997	0.681316078790052	0.754507193447679	1.9377150027961598e-36
2sjN2H	aGwo0E	outcome	ZNF26	Weighted median	440	0.360444387805864	0.0337035045532176	1.07922539885683e-26							1.43396651022224	1.34230128642081	1.53189151589201	7.02000952991756e-26
UOfosB	aGwo0E	outcome	ZNF233	Weighted median	42	0.263247615392241	0.237069678993407	0.266816807595616							1.30114886355231	0.81757801020613	2.07073617928719	0.325784106810169
wdgqH2	aGwo0E	outcome	ZNF23	Weighted median	1425	-0.0330555	0.0274632984867625	0.228734444999741							0.967484843089163	0.916783816540767	1.02098979576134	0.284216599671074
8wpqWH	aGwo0E	outcome	ZNF229	Weighted median	78	-0.269468	0.211089044654534	0.201758066440594							0.763786048073244	0.504997349443909	1.15519245373018	0.253967277915883
4V4Ykn	aGwo0E	outcome	ZNF227	Weighted median	207	-0.302407	0.0698925565133363	1.51335465424267e-05							0.739037504089195	0.644425523497209	0.847540037654564	3.24948974198325e-05
K7tQLx	aGwo0E	outcome	ZNF224	Weighted median	398	-0.0520675	0.0419859891506941	0.214932117397833							0.949264751881253	0.874275200512123	1.0306864115971	0.268837921761277
KxJoLF	aGwo0E	outcome	ZNF223	Weighted median	245	-0.0647433	0.0530064371374006	0.221925949973385							0.937308062979423	0.844816452066314	1.03992577651326	0.27666820698837
PZWwY9	aGwo0E	outcome	ZNF22	Weighted median	153	0.217968461983798	0.159598700712138	0.172024258732286							1.24354784796843	0.909513906008392	1.70026124941145	0.220073873690456
jLdd9g	aGwo0E	outcome	ZNF219	Weighted median	45	-0.693203	0.26368300365086	0.0085654738487494							0.499971903368421	0.298190700507782	0.838295438899238	0.0136525279738593
l1JDrz	aGwo0E	outcome	ZNF217	Weighted median	162	0.411620276688122	0.120271739926738	0.0006206660877405							1.50926122583378	1.19230411535189	1.91047688125525	0.0011365420042495
XcbvSU	aGwo0E	outcome	ZNF207	Weighted median	66	1.14944639742999	0.140830734476329	3.29794694374888e-16							3.15644500984393	2.39508365161028	4.15983178435966	1.3876882110725302e-15
XRXNVd	aGwo0E	outcome	ZNF205-AS1	Weighted median	269	0.276801732774237	0.0362255380073255	2.15430313176415e-14							1.31890484950468	1.22850708269243	1.41595439420229	8.27018708668463e-14
cGNSAk	aGwo0E	outcome	ZNF202	Weighted median	285	-0.556146	0.0859222825201213	9.628979282798959e-11							0.573414704413229	0.484540744432807	0.678589833806861	3.01114358468235e-10
t5J9Jh	aGwo0E	outcome	ZNF2	Weighted median	29	-1.19849	0.347001035697167	0.0005526604681543							0.301650308430388	0.152802524378471	0.595493490348176	0.0010171398542721
AkLCoi	aGwo0E	outcome	ZNF18	Weighted median	36	2.36526816672595	0.286491117406375	1.50646626886365e-16							10.6468935773093	6.07234937177662	18.6676253137562	6.43304979520018e-16
LxOYlS	aGwo0E	outcome	ZNF169	Weighted median	1118	-0.707296	0.0289547275982974	8.700316372995821e-132							0.49297562764019	0.465777694509766	0.521761716612523	5.31300036804836e-130
9ZJvo1	aGwo0E	outcome	ZNF165	Weighted median	865	1.06081032974685	0.0519453365271725	1.0733980965530599e-92							2.88871084944213	2.60907948178406	3.19831205984522	3.48417123285223e-91
LCL9WK	aGwo0E	outcome	ZNF160	Weighted median	172	-0.364411	0.109628283444507	0.0008871678533119							0.694605581925349	0.560300216459402	0.861104279935276	0.0015963269761498
r6Z6j8	aGwo0E	outcome	ZNF16	Weighted median	252	-1.31928	0.0860847270567203	5.17684979190713e-53							0.26732790520384	0.225822648316174	0.316461654459991	7.292612211850241e-52
b3aj44	aGwo0E	outcome	ZNF155	Weighted median	920	0.163863081249101	0.025199533972246	7.89311837536574e-11							1.17805300650375	1.12128123876584	1.23769919459281	2.48008476180241e-10
wdxuty	aGwo0E	outcome	ZNF146	Weighted median	361	-0.163175	0.0665792162287312	0.0142520639724484							0.849442139057017	0.745521939654108	0.967848039375651	0.0219871566196442
v5Ms8y	aGwo0E	outcome	ZNF140	Weighted median	492	-0.483096	0.0433748311929427	8.22113439134827e-29							0.616870577568944	0.566594891863182	0.671607377572565	5.77489979149408e-28
jlBvl4	aGwo0E	outcome	ZNF14	Weighted median	70	-0.817688	0.17694363360128	3.81566652262633e-06							0.441451074970704	0.312079410599473	0.624453408247752	8.65259217925773e-06
pXBtNH	aGwo0E	outcome	ZNF131	Weighted median	431	-0.332676	0.0805274360809001	3.60849617388606e-05							0.71700231000005	0.612314039679105	0.839589294432687	7.48218486017347e-05
LM4IoS	aGwo0E	outcome	ZNF124	Weighted median	927	-0.0879958	0.0305970677011782	0.0040280498261832							0.915764685008157	0.862460356939925	0.972363484953204	0.0066984564953187
OBqGs3	aGwo0E	outcome	ZNF12	Weighted median	100	-1.29439	0.283923728302458	5.14156244411232e-06							0.274065659916788	0.157099161037758	0.478118313614493	1.15207097889369e-05
VLqQdE	aGwo0E	outcome	ZNF106	Weighted median	410	1.05107979602046	0.068539550705285	4.43694664248277e-53							2.86073846492077	2.50112911681408	3.27205201429254	6.2628135708164705e-52
r3QCQ0	aGwo0E	outcome	ZMYND8	Weighted median	230	0.695448059122648	0.0611086943334663	5.2293492192772894e-30							2.00460705523022	1.77833052738064	2.25967523135177	3.82677439608881e-29
LO1zd5	aGwo0E	outcome	ZMYND12	Weighted median	881	0.147314299557094	0.017446136959431	3.06791761518448e-17							1.15871809038693	1.11976615252294	1.19902500175136	1.3519251979570001e-16
Lp6zjx	aGwo0E	outcome	ZMYND11	Weighted median	38	-0.664448	0.470064464112685	0.157501449048881							0.514557578344682	0.204789190418844	1.29288807134022	0.20309416773919
kJLzVF	aGwo0E	outcome	ZMYND10	Weighted median	4	-7.15582	3.75670977649193	0.0568046541484386							0.0007803080361767	4.94868898986469e-07	1.23038775030924	0.0796706884196943
DBu15Z	aGwo0E	outcome	ZMYM5	Weighted median	963	0.228371565110981	0.053626998847434	2.05786218751285e-05							1.2565521296344	1.13118148377611	1.39581780389294	4.36684702760608e-05
C4ow4F	aGwo0E	outcome	ZMYM2	Weighted median	429	-0.496305	0.134481199543417	0.000223798513417							0.608775822666759	0.467718650763058	0.792373794927703	0.0004294953355943
i6l0LV	aGwo0E	outcome	ZMIZ1	Weighted median	84	0.0044650653799397	0.0757265064520159	0.952981542985158							1.00447504863747	0.865923347803651	1.16519565605248	0.964144645165894
ItYfAD	aGwo0E	outcome	ZMAT4	Weighted median	373	-0.234046	0.0325818153775282	6.80334019465434e-13							0.791325456849251	0.742370893595238	0.843508257206938	2.4114321684352697e-12
YwiafK	aGwo0E	outcome	ZKSCAN8	Weighted median	136	1.01761196131934	0.0924754286111375	3.65007962025273e-28							2.76658016869706	2.30795100767077	3.31634675276421	2.49930538432911e-27
BJBt53	aGwo0E	outcome	ZKSCAN7	Weighted median	931	-0.133506	0.0251345642933272	1.08634510566829e-07							0.875022116028748	0.832959828142461	0.919208439195553	2.78278063130407e-07
WsvSVh	aGwo0E	outcome	ZKSCAN1	Weighted median	860	-0.0474681	0.0385898837372558	0.218672495931677							0.953640900379543	0.884171469424368	1.02856855070067	0.273032509831745
Kx8Rbl	aGwo0E	outcome	ZHX3	Weighted median	116	-0.766116	0.147554222646794	2.0793847438007e-07							0.464814975376604	0.348080281661973	0.620698651192675	5.21355280643452e-07
XD2r7m	aGwo0E	outcome	ZHX2	Weighted median	201	0.0680863334133858	0.0567143642636739	0.22994015436072							1.0704577207585	0.957840679137664	1.19631558451152	0.285614196713414
txGeQD	aGwo0E	outcome	ZHX1	Weighted median	6	1.03140908755966	1.58419538887175	0.515006599916371							2.80501556382411	0.125730585117108	62.5791433800059	0.580225109593351
9F4oSI	aGwo0E	outcome	ZGLP1	Weighted median	44	-1.61237	0.294355686399876	4.31100838628311e-08							0.199415111636322	0.111994693963911	0.355073846281869	1.13678541397141e-07
HYx8hx	aGwo0E	outcome	ZFYVE9	Weighted median	41	-0.0603703	0.358919372480452	0.866425718953858							0.941415825331536	0.465868296753107	1.90239121734945	0.895124237985351
wzyZUz	aGwo0E	outcome	ZFYVE28	Weighted median	694	-0.226688	0.0501514043671722	6.18172408838822e-06							0.797169306785977	0.722538231216958	0.87950903665168	1.37559441078619e-05
BYQdoL	aGwo0E	outcome	ZFYVE20	Weighted median	208	0.313259835958103	0.0951027532865401	0.000988044028193							1.36787690846277	1.13525629897544	1.64816283194754	0.0017679224601528
hKeNuv	aGwo0E	outcome	ZFYVE1	Weighted median	489	-0.543667	0.0743024081271002	2.53665776644604e-13							0.580615121244933	0.501927343670143	0.671638880147985	9.20647249748263e-13
DQE7Vr	aGwo0E	outcome	ZFR2	Weighted median	140	-0.36777	0.109467001334165	0.0007804434958073							0.692276650980945	0.558598147827122	0.85794584775765	0.0014122651193498
kF61eI	aGwo0E	outcome	ZFR	Weighted median	58	-1.22816	0.273453780658949	7.07873061743031e-06							0.292829432677719	0.171335031528688	0.500476031534727	1.56617192302794e-05
e8Op9F	aGwo0E	outcome	ZFPM1	Weighted median	588	-0.219176	0.0488597473119012	7.26309618146247e-06							0.803179965615742	0.729831511025133	0.883899978860038	1.60574035913716e-05
xnDw1m	aGwo0E	outcome	ZFPL1	Weighted median	16	1.61441913941736	0.788139327608583	0.0405214997111679							5.02496826959807	1.07215008477644	23.5510927704982	0.05824339269241
NkMpfe	aGwo0E	outcome	ZFP91	Weighted median	1147	0.0185446676512618	0.0353651767175172	0.600016696963588							1.01871768787973	0.95049623444828	1.0918357064312	0.660456861995725
MMOa6w	aGwo0E	outcome	ZFP82	Weighted median	1986	0.001051852504725	0.0128246478567137	0.934632366463709							1.00105240589558	0.976203258790111	1.02653408532084	0.950126366345161
IQAo8o	aGwo0E	outcome	ZFP69B	Weighted median	38	-1.35526	0.518791185377644	0.008992418598169							0.257880204978738	0.0932854765699249	0.712889107341667	0.0142887799043243
qGOpnH	aGwo0E	outcome	ZFP41	Weighted median	4	-0.52386	0.879077403256102	0.551228593713067							0.592230176119869	0.105731584397436	3.31723565390434	0.614627280890846
BICiYi	aGwo0E	outcome	ZFP36L1	Weighted median	353	0.423323864717225	0.0681372945224671	5.20463394648494e-10							1.52702876663103	1.33612651495445	1.74520663127337	1.5582360515010902e-09
HtIW1Z	aGwo0E	outcome	ZFP3	Weighted median	348	-0.547738	0.109170368093457	5.24085119528282e-07							0.578256253299446	0.466866427265135	0.716222617331224	1.27537447219623e-06
UztWZX	aGwo0E	outcome	ZFP1	Weighted median	1095	-0.0125398	0.0220470626257159	0.569510529808747							0.987538531982732	0.94577365301511	1.03114772656395	0.632188039639176
IQj8zg	aGwo0E	outcome	ZFHX3	Weighted median	277	-0.110196	0.0743131175448937	0.138110466612076							0.895658327670633	0.774258114402281	1.03609355201275	0.180037769329156
AKcpaW	aGwo0E	outcome	ZFC3H1	Weighted median	9	-1.52335	0.712809388694901	0.032589468942632							0.217980784751317	0.0539091657091004	0.881401555668646	0.0475900072174292
K34MzL	aGwo0E	outcome	ZFAND6	Weighted median	20	0.0623857850788635	0.224713719655488	0.781301473552932							1.06437288471011	0.685194112160816	1.65338495705029	0.823964920438372
Dge52N	aGwo0E	outcome	ZFAND2B	Weighted median	42	-0.525042	0.231001844910005	0.0230327348197371							0.591530478298903	0.376135553557223	0.930271822079421	0.0344751317426974
wggs3b	aGwo0E	outcome	ZFAND1	Weighted median	708	0.0364839902517825	0.0287019921937816	0.203682070700704							1.0371576992512	0.980422267960583	1.09717631705128	0.256180283073064
N0x5mJ	aGwo0E	outcome	ZDHHC8	Weighted median	341	0.87548462525823	0.0673055730109544	1.10752417376452e-38							2.4000381312733	2.10342233623461	2.7384814415717	1.0736855721446e-37
zUIOOB	aGwo0E	outcome	ZDHHC7	Weighted median	822	0.233306824086575	0.0225875711451312	5.21056609678274e-25							1.26276886779858	1.20808345771924	1.31992968142429	3.18546710653827e-24
7ernEl	aGwo0E	outcome	ZDHHC5	Weighted median	1347	0.11523375227719	0.0188560900738269	9.88711213697442e-10							1.12213570869473	1.08142089043471	1.16438	2.9081507555545802e-09
GXKiao	aGwo0E	outcome	ZDHHC4	Weighted median	1796	-0.196471	0.0233497804486479	3.95431434934913e-17							0.821625332659646	0.784870645800422	0.860101203784516	1.73294590438122e-16
Zz7CIU	aGwo0E	outcome	ZDHHC21	Weighted median	331	0.0764754565857878	0.0878409414095277	0.383965551443195							1.0794756959929	0.908743149466219	1.28228507573764	0.449439656398336
xUWpYP	aGwo0E	outcome	ZDHHC2	Weighted median	536	-0.366691	0.0450419199722368	3.9168774154471397e-16							0.693023768176266	0.634465005634276	0.756987286914418	1.6415464451589301e-15
sk2fqn	aGwo0E	outcome	ZDHHC16	Weighted median	98	0.614384913701579	0.185885958698219	0.0009491840787908							1.84851925094679	1.28408760951946	2.66105162590861	0.0017015327495374
H0aLMC	aGwo0E	outcome	ZDHHC12	Weighted median	162	1.14575228179907	0.22408934589001	3.17206293341722e-07							3.14480624769721	2.02696006116544	4.87913231495498	7.84920736787432e-07
rYVJaO	aGwo0E	outcome	ZDHHC11	Weighted median	7	-0.202422	0.790907175071353	0.798000077119999							0.816750348224865	0.173322741393584	3.84878017715298	0.838371848629621
cIDezW	aGwo0E	outcome	ZDBF2	Weighted median	144	-1.03303	0.113852300220954	1.15332984982755e-19							0.355926741827827	0.284739412489434	0.444911522576361	5.668320192104091e-19
2HDS6x	aGwo0E	outcome	ZCCHC9	Weighted median	154	0.0326263629172393	0.128781889628205	0.800000934531083							1.03316443856819	0.802690442380696	1.32981371243944	0.840098760094358
ZxqMLd	aGwo0E	outcome	ZCCHC6	Weighted median	205	-0.300166	0.0522457172203869	9.17704896967012e-09							0.740695158082896	0.668601048574425	0.820563052327275	2.53210695475349e-08
4M6SL8	aGwo0E	outcome	ZCCHC2	Weighted median	321	-0.195865	0.0609535128710132	0.0013119550366884							0.822123149891364	0.729545192488202	0.926449081628661	0.0023146387642853
zncHXY	aGwo0E	outcome	ZCCHC17	Weighted median	528	0.19057427609497	0.0420303110948347	5.78193564229872e-06							1.20994424023326	1.11426485695651	1.31383939404883	1.28982645415192e-05
lCz65D	aGwo0E	outcome	ZCCHC14	Weighted median	939	-0.124885	0.0401892070828915	0.001887297881058							0.882598715958592	0.815743360343218	0.954933293093559	0.0032660849915539
kzmN6r	aGwo0E	outcome	ZC3HAV1L	Weighted median	116	-0.16381	0.0869146190387209	0.0594676563398865							0.848903538288685	0.715937525672154	1.00656438792265	0.0831295273523503
UvL4Yi	aGwo0E	outcome	ZC3H6	Weighted median	273	0.167164253135855	0.0611605396931594	0.006272140469322							1.18194838809445	1.04842558428123	1.3324760603556	0.0101764444023094
WA8jYN	aGwo0E	outcome	ZC3H4	Weighted median	77	-0.29064	0.0988256332123098	0.003272200449602							0.747784788805699	0.616104739034399	0.907608812173028	0.0055048872441493
Ijt2xl	aGwo0E	outcome	ZC3H18	Weighted median	106	0.188724553577831	0.12692185015734	0.137031953535413							1.20770824774797	0.941724723467321	1.54881694759827	0.178740319485413
MbUQ8X	aGwo0E	outcome	ZC3H14	Weighted median	80	0.505471185695788	0.133575549006118	0.0001542288823316							1.65776645230373	1.27591441481461	2.15389808162251	0.0003008397944419
JHEBIt	aGwo0E	outcome	ZC3H13	Weighted median	121	-2.13005	0.128470259294169	9.708917925841709e-62							0.118831590379192	0.0923795446272034	0.152857939807271	1.6877187624572802e-60
4yhjIK	aGwo0E	outcome	ZC3H10	Weighted median	13	2.41330538991072	0.815913023082177	0.0030984573304424							11.1708241175867	2.25717913805362	55.284629102882	0.0052264779942586
MQ9SEu	aGwo0E	outcome	ZBTB8OS	Weighted median	193	0.844605153806688	0.199864264357818	2.37994230768513e-05							2.32705880283812	1.57282158722858	3.44298597872651	5.01967831739838e-05
oz7ZhT	aGwo0E	outcome	ZBTB7B	Weighted median	50	-0.0676506	0.17034669014547	0.691268119077554							0.934586975414591	0.669295175286488	1.30503378309984	0.743975750752422
nEfCgs	aGwo0E	outcome	ZBTB7A	Weighted median	123	-0.412642	0.0991396000128121	3.15155839091206e-05							0.661899376483137	0.545007703316288	0.803861637042797	6.57363053351185e-05
l7fdh2	aGwo0E	outcome	ZBTB5	Weighted median	287	-0.422358	0.11373700078324	0.0002044448742345							0.655499465475172	0.524514444082317	0.81919488411801	0.0003940768678037
xFW5If	aGwo0E	outcome	ZBTB47	Weighted median	457	0.026532114698457	0.0321029712200081	0.408538022444834							1.02688722490572	0.964264437824342	1.09357696012706	0.474458824204663
SV2v51	aGwo0E	outcome	ZBTB44	Weighted median	25	-1.1055	0.526649086126972	0.0358057034864912							0.331044213603311	0.117921568941642	0.929348823491904	0.0519320406712208
fQHP91	aGwo0E	outcome	ZBTB43	Weighted median	63	0.325966245738715	0.137740563938179	0.0179560468532439							1.38536860598966	1.05759212123149	1.81473191406429	0.0273141787323585
NsjuwN	aGwo0E	outcome	ZBTB42	Weighted median	75	-0.00832327	0.11997429620533	0.944690753854511							0.991711269331843	0.783900724340027	1.25461198233716	0.957826334087876
OdpXjn	aGwo0E	outcome	ZBTB41	Weighted median	135	0.141442113300585	0.129797704973902	0.275840039899713							1.15193382068396	0.893185146714725	1.48563993939697	0.335516187984182
GcVaFX	aGwo0E	outcome	ZBTB32	Weighted median	261	-0.00780098	0.0496757289588519	0.875214777612876							0.992229363878411	0.900175608986601	1.09369671952221	0.902356901692696
WMrQxQ	aGwo0E	outcome	ZBTB3	Weighted median	74	0.823056736467955	0.260319328765313	0.0015684048385125							2.27745077536661	1.36729023717792	3.7934755132337	0.0027423077061417
v1gg2Y	aGwo0E	outcome	ZBTB24	Weighted median	836	-0.181217	0.0353489393687265	2.9513951646953e-07							0.834254133108066	0.778410601774866	0.894103904829887	7.32076996141194e-07
sCTbSc	aGwo0E	outcome	ZBTB18	Weighted median	25	-0.161938	0.321578576697178	0.614561069611618							0.850493532303961	0.452832725043341	1.59736522668859	0.674003474715241
MhgglP	aGwo0E	outcome	ZBTB12	Weighted median	9	-4.20012	1.54028461749384	0.0063942797991341							0.0149937841284683	0.0007324778873204	0.306921978646377	0.0103644018805284
IC1DkA	aGwo0E	outcome	ZBTB11	Weighted median	7	-0.752918	0.75301686181027	0.317374097058236							0.47099023248673	0.10765420736962	2.0605957214126	0.380047326860773
DXlfJ9	aGwo0E	outcome	ZBTB1	Weighted median	94	1.35658049017808	0.219373706717669	6.254525784716801e-10							3.88289298377577	2.52592674979812	5.96884209910682	1.86353258152322e-09
mXzbEq	aGwo0E	outcome	ZBP1	Weighted median	45	-0.639077	0.124325663025673	2.74236868420046e-07							0.527779552920827	0.413641800689965	0.673411768386748	6.81906785310827e-07
GmQZmr	aGwo0E	outcome	ZBED6	Weighted median	10	0.530009758346196	0.218134963870593	0.0151099420601197							1.69894888746907	1.10789877866871	2.60531681937661	0.0232344518051574
ouTN17	aGwo0E	outcome	ZBED5	Weighted median	346	0.339527591282237	0.0589317555390066	8.34343921089221e-09							1.4042840378202	1.25109773061246	1.57622670925255	2.30893416611981e-08
T3FffP	aGwo0E	outcome	Z83851.3	Weighted median	217	-0.436561	0.0813526163084716	8.03779979359068e-08							0.646255230334386	0.551004728720541	0.757971394736201	2.07792476819864e-07
fFxkAE	aGwo0E	outcome	Z83844.1	Weighted median	199	-0.105411	0.0424643136511122	0.0130523462032644							0.899954769994359	0.828083878460847	0.978063465673296	0.020241236132714
Kigifi	aGwo0E	outcome	YTHDF2	Weighted median	557	0.0945042224280647	0.0215746746701493	1.18499012263338e-05							1.09911380405216	1.05360525603119	1.14658801039833	2.56909935614416e-05
8oORJY	aGwo0E	outcome	YRDC	Weighted median	318	0.163578966119705	0.060432362864266	0.0067932982382915							1.17771835136391	1.04616545813396	1.32581371747195	0.0109647580000758
s9mXgF	aGwo0E	outcome	YPEL5	Weighted median	55	0.476219613648028	0.268015869568879	0.0755956149316965							1.60997654995995	0.952094017958799	2.72244593761653	0.103748928090413
nmYsJn	aGwo0E	outcome	YOD1	Weighted median	28	1.27190343235836	0.367780915148186	0.0005435589844638							3.56763685902263	1.73507881463195	7.3357087012539	0.0010012469988615
hUFrtk	aGwo0E	outcome	YKT6	Weighted median	4	2.59234604190224	1.16044769887396	0.0254884100311625							13.3610805175765	1.37419561424005	129.907613404724	0.0378833274397401
xmlmuW	aGwo0E	outcome	YIPF4	Weighted median	507	0.711763836577751	0.0654028146350082	1.39264342994909e-27							2.03758205268356	1.79243372604988	2.31625892833854	9.33651287417218e-27
mycqhq	aGwo0E	outcome	YIF1B	Weighted median	606	-0.118696	0.0226927349441878	1.68972197530472e-07							0.888077437723567	0.849443291168241	0.928468731925565	4.26514074933471e-07
BKOKfO	aGwo0E	outcome	YBEY	Weighted median	1916	-0.157312	0.0098029343624694	5.95945906744517e-58							0.854437638037728	0.838177396066414	0.871013320952936	9.45456507093751e-57
LhMNbA	aGwo0E	outcome	YARS2	Weighted median	186	-0.0855191	0.0795180689354429	0.282165209360871							0.91803556612185	0.785547335744959	1.07286889320988	0.342249148982448
4Mvyof	aGwo0E	outcome	YAE1D1	Weighted median	85	1.35215191791748	0.217004393817284	4.63500650098767e-10							3.86573533160986	2.52647059243317	5.91493512681844	1.3913186667170601e-09
xFeohq	aGwo0E	outcome	XYLB	Weighted median	553	0.580811984859564	0.0413999901554261	1.03196342201449e-44							1.78748925585874	1.64817399294057	1.93858042506173	1.17551507811349e-43
lFiQLR	aGwo0E	outcome	XXYLT1-AS2	Weighted median	209	-0.0546383	0.0411627514782458	0.184385469889925							0.946827546850286	0.873438725628778	1.02638270684548	0.234247830096741
0chf2D	aGwo0E	outcome	XXbac-B562F10.11	Weighted median	28	0.522410595447026	0.245656264858492	0.0334540154350943							1.68608722892879	1.04177325733248	2.7288952980384	0.0487631288035867
11PZAq	aGwo0E	outcome	XXbac-B476C20.10	Weighted median	42	-0.317158	0.114037390667985	0.0054162819501319							0.728215874903784	0.582357342573217	0.910606463925904	0.0088640996847109
iVeFN4	aGwo0E	outcome	XXbac-B444P24.10	Weighted median	11	0.179053799624731	0.152058399645989	0.238982791811448							1.19609	0.887824967862408	1.61137566251655	0.295531085453341
UYm6TD	aGwo0E	outcome	XXbac-B135H6.15	Weighted median	117	-0.0473772	0.126723033163084	0.708505243216132							0.953727560785573	0.743970147699043	1.22262467521742	0.759334530775047
h7qEhX	aGwo0E	outcome	XRCC6	Weighted median	442	0.798231378176665	0.076428280360359	1.5578173104443402e-25							2.22160826695824	1.91253951639107	2.58062290975847	9.72464601818067e-25
e1x0DJ	aGwo0E	outcome	XRCC5	Weighted median	332	-0.163289	0.0552620935772158	0.0031285670959061							0.849345474094374	0.762156807754048	0.946508286779475	0.00527492577861
jTXaGc	aGwo0E	outcome	XRCC4	Weighted median	46	-0.778866	0.569586404407086	0.171492390792189							0.458926039409064	0.150279923289343	1.40147203324148	0.219482360102238
jIyejO	aGwo0E	outcome	XRCC3	Weighted median	1233	-0.189027	0.0186889919774304	4.77103488440353e-24							0.827763928460291	0.79799120724773	0.858647457561899	2.81470547401705e-23
j8zogW	aGwo0E	outcome	XPOT	Weighted median	179	-0.333142	0.0738547774492066	6.45912150982549e-06							0.716668218489398	0.620085662603607	0.828294163803458	1.43454405659912e-05
PdFqeI	aGwo0E	outcome	XPO5	Weighted median	4	-0.0900793	1.15729520924849	0.937958453050814							0.913858702478254	0.0945735044389786	8.83056764206185	0.952652319156049
slxLEn	aGwo0E	outcome	XPO1	Weighted median	40	-0.321819	0.254602154831752	0.20622768732614							0.724829529633711	0.440062284333178	1.19387156257921	0.259072024537794
QTVyF6	aGwo0E	outcome	XPNPEP3	Weighted median	565	-0.163087	0.0534540327945689	0.0022809968297443							0.849517354085798	0.765017313207561	0.943350852893878	0.0039065411627212
YSReEz	aGwo0E	outcome	XPA	Weighted median	15	-0.468143	0.460506587119472	0.309352039721638							0.626163988846675	0.253920033587365	1.54411345725298	0.371341209504521
iS8rW1	aGwo0E	outcome	XCR1	Weighted median	465	0.51836193936227	0.0394569717224965	2.01021053873884e-39							1.67927464182684	1.55430154074643	1.81429616374723	1.98740106554563e-38
wPZa33	aGwo0E	outcome	XBP1P1	Weighted median	51	0.734801137367434	0.13928992380862	1.32513133506536e-07							2.08506730929969	1.58691659765779	2.7395930515359	3.37224866564849e-07
h9Cvwr	aGwo0E	outcome	XAF1	Weighted median	252	0.33224903723509	0.0799597564103335	3.24998550261237e-05							1.39409998809186	1.19187525899243	1.63063606038831	6.76807460209749e-05
LALTIR	aGwo0E	outcome	XAB2	Weighted median	299	0.355779878795115	0.0387538508855893	4.2907885370260105e-20							1.42729333615386	1.32289475414724	1.53993071712074	2.14987653240057e-19
jE9MSG	aGwo0E	outcome	WWC2	Weighted median	262	0.0111241859713004	0.112471612728949	0.9212124203748							1.01118628979927	0.811135488776587	1.26057573220008	0.939642755167366
B48Lun	aGwo0E	outcome	WTAP	Weighted median	393	0.156890665069745	0.0502338481045408	0.0017889237865013							1.16986769950495	1.0601732336946	1.29091208007168	0.0031052388118661
rndOct	aGwo0E	outcome	WSCD1	Weighted median	17	-0.921774	0.324765655506699	0.004535821140057							0.397812713767435	0.210490525227924	0.751838853856481	0.0074956739181213
j6Vfuo	aGwo0E	outcome	WRAP73	Weighted median	313	0.0230123382583869	0.0287012514932107	0.422675213717792							1.02327916495207	0.967304332667635	1.08249308316164	0.488831696591522
g64tcz	aGwo0E	outcome	WNT16	Weighted median	90	0.611026000813063	0.209355035802155	0.0035159418653414							1.84232065191507	1.22224597656034	2.77697407032961	0.0058930644944347
9eUmMC	aGwo0E	outcome	WNT11	Weighted median	187	-0.462522	0.0671622441295696	5.71295998733207e-12							0.629693857848926	0.552026340183413	0.718288831074474	1.9169826954708e-11
5kgpDn	aGwo0E	outcome	WNT10A	Weighted median	13	1.02964	0.523395827975539	0.0491567662648476							2.80005673029064	1.00379102277894	7.81070712421841	0.0696821245812822
sP3a7N	aGwo0E	outcome	WNK1	Weighted median	220	0.795461171599498	0.0972285943813835	2.8068107900783003e-16							2.21546246961959	1.83105650721574	2.68056935160145	1.18425889027448e-15
ndWcKv	aGwo0E	outcome	WIZ	Weighted median	3	-0.319897	0.758404855491289	0.673169138299961							0.726223755704371	0.164249178203752	3.21098071306706	0.727571702278172
wPFAWz	aGwo0E	outcome	WHAMMP3	Weighted median	12	0.0641963426656349	0.195978808892556	0.743238489424283							1.0663017387354	0.72620558975584	1.56567150414309	0.790591057898282
ZtmSfX	aGwo0E	outcome	WFS1	Weighted median	281	0.21261983912874	0.0367539282139374	7.253152855533021e-09							1.23691	1.1509436139944	1.32930671369531	2.014887036223e-08
5pjZEG	aGwo0E	outcome	WFIKKN1	Weighted median	519	-0.160004	0.0182231793524567	1.63097942247234e-18							0.852140173118665	0.822241053258866	0.883126513526315	7.61869103710297e-18
81vsRE	aGwo0E	outcome	WDR92	Weighted median	200	0.163843030677499	0.0377273407349613	1.40665706704505e-05							1.17802938610439	1.09406207404887	1.26844103953785	3.0300012680718e-05
xVw38t	aGwo0E	outcome	WDR88	Weighted median	264	-0.297637	0.0926184097606642	0.0013109025733427							0.742570936575908	0.619297840203992	0.890381913273894	0.0023128645345113
jMqg8X	aGwo0E	outcome	WDR86	Weighted median	469	-0.00107001	0.0301387714376987	0.971678959192199							0.998930566975842	0.941630815063358	1.05971710109289	0.978352741633152
q94xso	aGwo0E	outcome	WDR83	Weighted median	51	-2.16565	0.286943151570081	4.4438146450609204e-14							0.114675894787775	0.0653463291400395	0.201244064026837	1.6758608771751499e-13
VW8j5z	aGwo0E	outcome	WDR78	Weighted median	96	0.11677037237988	0.206468806407064	0.571693340155419							1.12386133045566	0.749830207427941	1.68446706678584	0.634226311050439
Di1ggM	aGwo0E	outcome	WDR77	Weighted median	98	-0.189334	0.0659958425780425	0.0041192967959067							0.827510014039737	0.727103880999397	0.941781279443638	0.0068412148992565
TQCVtL	aGwo0E	outcome	WDR66	Weighted median	245	-0.20785	0.0416892840975932	6.17405598697433e-07							0.812328947118169	0.74859219447432	0.881492384233976	1.49437503270047e-06
ibFMaw	aGwo0E	outcome	WDR65	Weighted median	49	-0.974479	0.236197891621845	3.69625164149529e-05							0.377388832327147	0.237538133772818	0.599576701656925	7.65707480060347e-05
B3rFga	aGwo0E	outcome	WDR62	Weighted median	64	-0.319237	0.127779765158056	0.0124776742611551							0.72670315916516	0.565703305298483	0.933523768721809	0.0194134268108162
hzPU2i	aGwo0E	outcome	WDR61	Weighted median	525	0.122607655743527	0.0264383683575962	3.52666514334627e-06							1.1304408119696	1.07335413782018	1.19056365866508	8.0244951214414e-06
9u9g4L	aGwo0E	outcome	WDR5B	Weighted median	1104	0.215531756482861	0.0168722323535223	2.28052612055037e-37							1.24052137689345	1.20016876099687	1.28223074665883	2.1245489710267798e-36
5ofbrk	aGwo0E	outcome	WDR52	Weighted median	1024	0.124406144839907	0.0339724757153494	0.0002502843842861							1.13247572678158	1.05952436211753	1.21045000719596	0.0004782178000033
0aukC9	aGwo0E	outcome	WDR5	Weighted median	73	0.366405271947024	0.0530963194874461	5.17229016414686e-12							1.44253974509645	1.29996388817095	1.60075286330513	1.73910468236131e-11
cgGwEU	aGwo0E	outcome	WDR49	Weighted median	114	0.129462736410983	0.219857759653669	0.555963443389363							1.13821669663333	0.739738545201681	1.75134479188411	0.619334845503791
7vdyfo	aGwo0E	outcome	WDR46	Weighted median	30	3.41508947983727	0.304378469029038	3.25717163214359e-29							30.4196712530228	16.7518	55.2391134378771	2.32065258354182e-28
wI2If2	aGwo0E	outcome	WDR45B	Weighted median	694	0.0037650196660992	0.0222962422133392	0.865904074217449							1.00377211625611	0.960851301502622	1.04861018536127	0.894680616107513
NKXgMn	aGwo0E	outcome	WDR37	Weighted median	284	0.618460807103554	0.0881104564219146	2.23216656118532e-12							1.85606899388693	1.56168335393613	2.20594789679071	7.67722950586456e-12
DSspP4	aGwo0E	outcome	WDR35	Weighted median	408	-0.0393838	0.0534522096164527	0.461241454381127							0.96138165015803	0.865757752447466	1.06756731273586	0.527287089454838
tMaVj6	aGwo0E	outcome	WDR31	Weighted median	74	0.716015607144231	0.258688718021719	0.0056424716938252							2.04626382746041	1.23242739912154	3.39751911922561	0.009216565683255
lv9jcw	aGwo0E	outcome	WDR24	Weighted median	380	-0.265324	0.0269742332709446	7.86108161081586e-23							0.766957086015822	0.727461700395404	0.808596757011617	4.42072868320018e-22
qEqqkx	aGwo0E	outcome	WDR20	Weighted median	44	-2.80975	0.356243384325836	3.0916526901032204e-15							0.0602203421970129	0.0299573041274862	0.121055272493561	1.23773839423962e-14
OLsJb2	aGwo0E	outcome	WDR17	Weighted median	38	0.683160850990905	0.290976478800961	0.0188835653525044							1.98012673649916	1.11946058923845	3.50249212012556	0.0286395523764283
UqRvlD	aGwo0E	outcome	WDFY1	Weighted median	845	0.0846584416070054	0.0265869837905382	0.0014515151847584							1.08834526974547	1.03308343179604	1.14656318136675	0.0025464916432039
1VAgPf	aGwo0E	outcome	WBSCR22	Weighted median	376	-0.123893	0.0313827613178847	7.88743701436404e-05							0.883474631452767	0.830769488159256	0.939523460532986	0.0001585736584139
XBwCLb	aGwo0E	outcome	WBSCR16	Weighted median	9	0.243270636437899	0.289413018931959	0.40059132042017							1.2754137508488	0.72326551710259	2.24907754813294	0.466425005956108
zyngnO	aGwo0E	outcome	WBP2NL	Weighted median	339	-0.297531	0.0596326942140087	6.05709908818309e-07							0.742649837145281	0.660729528328305	0.834727005477295	1.46736069363757e-06
eXa6rl	aGwo0E	outcome	WBP2	Weighted median	269	-0.502649	0.118961565452578	2.38616217428014e-05							0.604926069799819	0.479115446293984	0.76377322575177	5.03152374817372e-05
Mcawhe	aGwo0E	outcome	WBP1	Weighted median	225	0.130374227178625	0.117270681821163	0.266250985265532							1.13925464361157	0.905311397173982	1.43365161097281	0.325149488927499
6eWZay	aGwo0E	outcome	WASIR2	Weighted median	93	0.329470471462861	0.0629638947041123	1.67061802113022e-07							1.39023176612515	1.22882845249486	1.57283497108115	4.21912269931206e-07
TfAnia	aGwo0E	outcome	WASF2	Weighted median	135	1.49609334942135	0.134391641187452	8.73135291721584e-29							4.46421483223348	3.43043039430075	5.8095375150137	6.1289432817450095e-28
oyGafr	aGwo0E	outcome	VWCE	Weighted median	175	-0.580164	0.119233859928196	1.14014381185743e-06							0.559806519684588	0.443143151091335	0.707183	2.70241926484637e-06
AN7zNa	aGwo0E	outcome	VWA5B2	Weighted median	5	-1.61795	0.72517646255266	0.0256735235170748							0.198304418559524	0.0478684896040337	0.821514168203816	0.0381343680791956
5g3d3H	aGwo0E	outcome	VTI1A	Weighted median	52	0.0525662936028416	0.26012045938176	0.839850723307966							1.05397243139234	0.633009526754955	1.75488336143969	0.873199298818904
k8NC0R	aGwo0E	outcome	VSTM4	Weighted median	16	0.543498164297209	0.428124008082595	0.204267173079195							1.7220202478973	0.744066481307745	3.98533438699787	0.256850801792651
ZG4jFF	aGwo0E	outcome	VSTM2B	Weighted median	4	1.66249510520458	0.610269152111469	0.0064457498142215							5.27244976298296	1.59419286446351	17.4374927418422	0.0104416623953828
aog790	aGwo0E	outcome	VSIG8	Weighted median	115	-0.559988	0.0911888620542351	8.20186301452436e-10							0.57121583573917	0.477725817636757	0.683001669479152	2.42516542079571e-09
H2xb0D	aGwo0E	outcome	VSIG2	Weighted median	56	0.182976760417957	0.197238050459168	0.353565783891407							1.20078650198014	0.815780611614874	1.76749508729243	0.417935838196564
OawRnr	aGwo0E	outcome	VPS53	Weighted median	915	-0.0766131	0.0124860761396882	8.46895712990072e-10							0.92624819316209	0.90385551282532	0.949195643730992	2.5015957494079802e-09
LKzPNw	aGwo0E	outcome	VPS4B	Weighted median	32	-1.01225	0.349755242398464	0.0038017173848881							0.363400990606341	0.183091605994189	0.721279816497223	0.0063410730938123
6AQbD5	aGwo0E	outcome	VPS4A	Weighted median	291	0.49777298961155	0.0762311277231499	6.586350418494869e-11							1.6450536367479	1.41674215576964	1.91015807411149	2.07675178532615e-10
0nSS88	aGwo0E	outcome	VPS39	Weighted median	42	-2.40236	0.459139013528916	1.67408281322346e-07							0.0905044885693236	0.0367996001788383	0.22258563710986	4.22739282466155e-07
nwlaGP	aGwo0E	outcome	VPS37D	Weighted median	50	0.390359110568942	0.125991443064818	0.0019463521770656							1.47751128854327	1.15420971709739	1.89137171125426	0.0033631435278084
YJ78W7	aGwo0E	outcome	VPS37C	Weighted median	130	1.0215752028716	0.110347890903002	2.08749610910616e-20							2.77756655064149	2.23735270023296	3.44821625237683	1.06044802342593e-19
wvH5ty	aGwo0E	outcome	VPS37A	Weighted median	270	0.651699958395227	0.0808435496747171	7.55190195088266e-16							1.91879993811766	1.63762431144611	2.24825265281333	3.1155458211228e-15
gaiVmY	aGwo0E	outcome	VPS35	Weighted median	166	-0.458064	0.0871448908354155	1.46945504247244e-07							0.63250717072446	0.533195192322148	0.750316819766351	3.72819882206585e-07
I2pQWA	aGwo0E	outcome	VPS33A	Weighted median	157	1.11109947768266	0.153507234562894	4.55040935090328e-13							3.03769643848776	2.24841449276906	4.10404739965756	1.62818768134044e-12
s000hO	aGwo0E	outcome	VPS25	Weighted median	18	4.62875414711285	1.07855342970772	1.77364913347813e-05							102.386426193291	12.3640049532153	847.862833143569	3.78454576690796e-05
QFsAw6	aGwo0E	outcome	VPS18	Weighted median	4	-0.613097	1.82754429223956	0.737266271232218							0.541670875165306	0.0150694838639541	19.4702976990587	0.785218936698256
5dxSBP	aGwo0E	outcome	VPS13B	Weighted median	339	-0.118716	0.0940430330396773	0.206818761300928							0.888059709624769	0.738569078511142	1.06780810462394	0.259715494383715
ZskwQf	aGwo0E	outcome	VPS13A	Weighted median	618	0.225675206537426	0.0332179357755618	1.0923614141956399e-11							1.25316857821045	1.17417767605102	1.33747346542617	3.6119356766954895e-11
EegVNl	aGwo0E	outcome	VPREB1	Weighted median	247	-0.339212	0.0671232240787657	4.33640948072736e-07							0.712331769469553	0.624519311386421	0.812491368231943	1.06181422272192e-06
MPQMpA	aGwo0E	outcome	VN1R82P	Weighted median	71	0.830352346853456	0.0779928865142441	1.8101761790990002e-26							2.29412692627883	1.96892220561547	2.67304535388302	1.17037212113634e-25
78Myin	aGwo0E	outcome	VMP1	Weighted median	400	-0.995686	0.0643056341674745	4.4730135655601e-54							0.369469743537554	0.325717294121738	0.419099304376161	6.45952321483092e-53
oumhl4	aGwo0E	outcome	VMAC	Weighted median	126	-0.12145	0.0850281005815308	0.153190895440899							0.885635368871909	0.749682843085932	1.04624243949381	0.198081236618074
8TV3Xn	aGwo0E	outcome	VIPR1	Weighted median	1368	-0.064337	0.0230249311990387	0.0052022950789592							0.937688919927319	0.896312735275628	0.980975139535508	0.0085277385289609
RiC8WX	aGwo0E	outcome	VIPAS39	Weighted median	301	0.16272505508376	0.0536677979403155	0.0024287485129746							1.1767131139192	1.05922358326595	1.30723463331516	0.004147079901375
PXsjjC	aGwo0E	outcome	VHL	Weighted median	73	-0.044101	0.107767912911806	0.682376697181557							0.956857301650584	0.774663824916537	1.18190093079496	0.735945509875357
7iWx8L	aGwo0E	outcome	VEZF1	Weighted median	91	0.112698568672971	0.14797115323162	0.446283691811395							1.11929449166949	0.837507641068208	1.49589101955386	0.512559647252316
wMmR7S	aGwo0E	outcome	VENTX	Weighted median	1052	-0.0556895	0.0328947380878666	0.0904630500356735							0.945832789166319	0.886775731627862	1.00882289981021	0.122422233630427
E9tjSd	aGwo0E	outcome	VDAC2	Weighted median	294	0.346240663641753	0.0688910393292022	5.01031888137641e-07							1.41374281137317	1.23517693442177	1.61812342913039	1.22107830741768e-06
2aRIOz	aGwo0E	outcome	VCPIP1	Weighted median	226	-0.290637	0.336492366946867	0.387738972090112							0.74778717081012	0.386678410622051	1.44612586963063	0.453340948505889
ViHqbG	aGwo0E	outcome	VCAN	Weighted median	157	-0.57258	0.138658883708076	3.63685122635894e-05							0.564068107859852	0.429835935596468	0.740219241704574	7.53844764352651e-05
gerZlq	aGwo0E	outcome	VASH2	Weighted median	135	0.472010673338401	0.120420205440138	8.86605009814846e-05							1.60321449528609	1.26615793949447	2.02999692038551	0.0001772887043628
D7J7DM	aGwo0E	outcome	VANGL2	Weighted median	10	-0.43539	0.470093335902721	0.354354039167202							0.647012539887291	0.257490477163732	1.62578916075879	0.418747371118434
XKQuGA	aGwo0E	outcome	VAMP3	Weighted median	724	-0.0264423	0.0326415980560394	0.417894982314812							0.973904274258785	0.913547603502639	1.03824861647376	0.483960379082929
FilTYm	aGwo0E	outcome	VAMP2	Weighted median	259	0.621247680943886	0.115191414899979	6.92227317460431e-08							1.86124883844599	1.4850857396707	2.33269174033325	1.79819676961288e-07
aKGeK1	aGwo0E	outcome	VAC14	Weighted median	89	-0.540817	0.199676579154211	0.0067595530511707							0.582272491414768	0.393693402972413	0.861180938513511	0.010914986135344
Tuz9kU	aGwo0E	outcome	UXS1	Weighted median	145	-0.109403	0.156832014221305	0.485439138422178							0.896369049139106	0.659156815181969	1.2189473790584	0.551047764423401
nlu70T	aGwo0E	outcome	UVRAG	Weighted median	545	-0.312382	0.0598755135015903	1.81654227101811e-07							0.731701851759635	0.650679445808849	0.822813142964654	4.57287326446409e-07
DSPcHo	aGwo0E	outcome	UTS2D	Weighted median	317	-0.398748	0.0409256773239061	1.9717632057678e-22							0.67115949577812	0.619425527398617	0.727214247473628	1.09180696765912e-21
OLwBxh	aGwo0E	outcome	UTP6	Weighted median	287	0.686714040327528	0.0624459265232878	3.95324469739958e-28							1.98717501622516	1.75825180772086	2.24590387325021	2.70501589730792e-27
5bKD5y	aGwo0E	outcome	UTP3	Weighted median	3	4.27815035219979	2.67975287715175	0.11038345923033							72.1069441346131	0.377507332357684	13773.007692221	0.146849980782442
1V76rh	aGwo0E	outcome	UTP23	Weighted median	440	0.0253045391559338	0.0311980741740495	0.417312273187007							1.02562741667659	0.964791091834341	1.09029986568254	0.483432871365608
vumrOh	aGwo0E	outcome	UTP11L	Weighted median	442	-0.050801	0.0330789181177664	0.124599246293141							0.950467784725985	0.890799691323356	1.01413260309943	0.163886490005858
3g1aWh	aGwo0E	outcome	USP8	Weighted median	1382	-0.17396	0.0165774848340898	9.22697255654904e-26							0.840330220408517	0.813465131848221	0.868082541813955	5.822456574418091e-25
kwP7RL	aGwo0E	outcome	USP7	Weighted median	99	0.664659142478727	0.210448581242096	0.0015869373950659							1.94382784006395	1.2868275466442	2.93626498877896	0.0027724544921297
LrpAOD	aGwo0E	outcome	USP6NL-IT1	Weighted median	88	1.06872751870259	0.084081166774492	5.1594009350941e-37							2.91167209339146	2.46928449817839	3.4333161633213	4.7465527820568694e-36
7TQJ5c	aGwo0E	outcome	USP6	Weighted median	658	-0.169463	0.0503294441141748	0.0007597278808963							0.844118401472722	0.764825008344745	0.931632553761484	0.0013771496477553
wx2WqG	aGwo0E	outcome	USP47	Weighted median	447	0.497916701658091	0.0316872592034682	1.22303851144285e-55							1.64529006776129	1.54621448133643	1.75071404371679	1.83207312252307e-54
RHvnOA	aGwo0E	outcome	USP44	Weighted median	429	0.196517089149131	0.0592268341524638	0.0009065103933974							1.21715612086293	1.08375568438953	1.36697693390979	0.0016293898101412
WLkFFT	aGwo0E	outcome	USP33	Weighted median	398	0.0535691984471286	0.0755655121189984	0.478379908176068							1.05502999567906	0.909792065250407	1.22345350580321	0.544021974209804
z21NXh	aGwo0E	outcome	USP32P3	Weighted median	779	0.0878597791062899	0.0109834392848934	1.2513284012307302e-15							1.09183501321258	1.06858168175243	1.1155943587971	5.1107289191469806e-15
jAhFNT	aGwo0E	outcome	USP32P1	Weighted median	92	0.386084976112942	0.098959390562648	9.56187649487033e-05							1.47120968318334	1.21182146490215	1.78611948589901	0.0001905855662374
EbZGQD	aGwo0E	outcome	USP31	Weighted median	107	-1.00308	0.246855800263065	4.83555946990132e-05							0.366747112873875	0.226067850187963	0.594969362912463	9.91208433224907e-05
4fkNbw	aGwo0E	outcome	USP30-AS1	Weighted median	147	0.82654752045512	0.0871984799091269	2.56925428050567e-21							2.28541475624614	1.9263721130592	2.7113767753692	1.35781845549659e-20
LZBxB2	aGwo0E	outcome	USP30	Weighted median	223	-0.666001	0.0833604208111013	1.3558423691587e-15							0.513759142167099	0.436316604020137	0.604947081381509	5.526623808873551e-15
uRxLzl	aGwo0E	outcome	USP22	Weighted median	424	0.0952678196617008	0.025223950038646	0.0001588055177977							1.09995340483001	1.04689524838585	1.15570062493129	0.0003093151315155
saqw8M	aGwo0E	outcome	USP20	Weighted median	104	-0.249821	0.169155117132459	0.139709125123408							0.778940218239674	0.559134622581614	1.08515523647922	0.181958502279651
0nSGyz	aGwo0E	outcome	USP19	Weighted median	104	0.632867049997805	0.148191599678491	1.9494775785324e-05							1.88300150700842	1.40833973068363	2.5176415875698	4.14397146474921e-05
oPMWG1	aGwo0E	outcome	USP18	Weighted median	66	-0.919006	0.124108354059937	1.31280421772126e-13							0.398915345850622	0.312778994922513	0.50877282598387	4.83895148609143e-13
4Lm2z4	aGwo0E	outcome	USP16	Weighted median	147	-0.847866	0.123236243174215	5.98498641847087e-12							0.428327947655114	0.336415195630122	0.545352389325946	2.0064894410404198e-11
qIpkRZ	aGwo0E	outcome	USP14	Weighted median	401	0.0440679903275899	0.0301719489805795	0.144135788672847							1.04505340599645	0.9850439399937	1.10871868456117	0.187299183749925
yqc9iH	aGwo0E	outcome	UROS	Weighted median	1007	0.0809316329101511	0.0079172332679301	1.57701352756874e-24							1.08429676381839	1.06760076563685	1.10125386742835	9.48608295415542e-24
jGCcaB	aGwo0E	outcome	UROD	Weighted median	1969	0.250594436791837	0.0122182365373266	1.75765324367034e-93							1.2847889155405	1.25438660629663	1.3159280792778	5.79661837096434e-92
Hv8hyF	aGwo0E	outcome	URM1	Weighted median	531	0.184235790613509	0.0425151877968194	1.46816521524654e-05							1.20229928056167	1.10617268157047	1.30677929777369	3.15643701330888e-05
ARcvgH	aGwo0E	outcome	URB2	Weighted median	51	-0.218839	0.287079384888473	0.445883904911842							0.8034508986869	0.457712143848838	1.41034786879934	0.512136207438848
AiE4KD	aGwo0E	outcome	URB1	Weighted median	307	-0.515617	0.0296470346290427	9.50855151725924e-68							0.597131878589303	0.563422507063596	0.632858070022651	1.89110696701754e-66
3saNMa	aGwo0E	outcome	UQCRQ	Weighted median	28	0.793577237518421	0.322993913713389	0.0140125398137903							2.21129261346809	1.17410853572177	4.16470443200772	0.0216412874959574
xYscaM	aGwo0E	outcome	UQCRC2	Weighted median	113	0.488214783166488	0.115286239176505	2.28749755909055e-05							1.62940478110995	1.29985634482478	2.04250258213098	4.83172610679167e-05
8NYF3q	aGwo0E	outcome	UQCR11	Weighted median	3	-0.860387	0.890107702691131	0.333739113771166							0.422998407857913	0.0739032878753541	2.42110545003235	0.397390056342177
B47zvQ	aGwo0E	outcome	UQCR10	Weighted median	854	0.0985001691696741	0.0352464407926464	0.0051961843058886							1.10351459107558	1.02985410359765	1.18244365727406	0.0085185695458375
JLn5Xp	aGwo0E	outcome	UPK3B	Weighted median	1355	0.1638981152379	0.0178213034925785	3.68931389110518e-20							1.17809427912255	1.13765412866613	1.21997195415496	1.85415233125401e-19
7F3yZc	aGwo0E	outcome	UPF2	Weighted median	43	0.688952986893828	0.303329872451749	0.0231288536345754							1.99162917936032	1.09902831221682	3.60917616405948	0.0346106123495768
wiV7SC	aGwo0E	outcome	UNC93B1	Weighted median	144	-0.204144	0.190959517541524	0.285049105721179							0.815344595035948	0.5607808488795	1.18546631894197	0.345306286350434
ov0592	aGwo0E	outcome	ULBP2	Weighted median	14	0.819084494047553	0.331109040968268	0.0133699261462618							2.26842213263683	1.18543615925594	4.34079805281665	0.0207025375773005
a10gGQ	aGwo0E	outcome	UHRF2	Weighted median	115	-1.80932	0.317727365339411	1.23695143369094e-08							0.163766195852126	0.0878555632680226	0.305266575117826	3.38292247999521e-08
w7nGUR	aGwo0E	outcome	UHMK1	Weighted median	431	0.381034816114037	0.0311195046317083	1.80349167336687e-34							1.46379856830044	1.37718365900424	1.55586093005756	1.53670057156508e-33
596Vvw	aGwo0E	outcome	UGT2B11	Weighted median	1411	-0.145992	0.0133127377618672	5.5493439283776695e-28							0.864164998862731	0.841908009134239	0.887010382556358	3.77987368114769e-27
peby59	aGwo0E	outcome	UGDH	Weighted median	2171	0.065689682398186	0.0107495276880156	9.90480993450238e-10							1.06789527904113	1.04563108071469	1.09063353990861	2.9131828611908104e-09
thg00H	aGwo0E	outcome	UFSP2	Weighted median	46	-0.688165	0.218786943909083	0.0016587840287002							0.502497150950593	0.327264122881663	0.771558411261497	0.0028917360305542
NPdLcX	aGwo0E	outcome	UFM1	Weighted median	26	0.48402662292747	0.969072358016623	0.617445370966148							1.62259484330206	0.242839341888657	10.8417936115047	0.676761113345919
C4GzFW	aGwo0E	outcome	UEVLD	Weighted median	407	-0.361175	0.0510757564836466	1.5342056340907199e-12							0.696856931405522	0.630473827335356	0.770229566705897	5.3342501893858594e-12
0KlRg3	aGwo0E	outcome	UCHL5	Weighted median	260	-0.0987967	0.0795826800939499	0.214445114186271							0.905926845570115	0.775087948922224	1.05885203178017	0.268296704640625
SPkTwd	aGwo0E	outcome	UBXN8	Weighted median	83	0.264846777789936	0.191992677670182	0.167752074368526							1.30323127650317	0.894528182193971	1.89866769305183	0.215146825805512
g9CzKv	aGwo0E	outcome	UBXN7	Weighted median	267	-0.230371	0.0835285497611508	0.0058158153240873							0.794239026409774	0.674295538501665	0.935518025929795	0.00948121450818
gpYo31	aGwo0E	outcome	UBXN2B	Weighted median	616	0.508876363356321	0.0312660714621569	1.46894935800289e-59							1.66342106360766	1.56454471274052	1.76854621815627	2.4262957249554202e-58
DuEcto	aGwo0E	outcome	UBXN2A	Weighted median	1620	-0.123564	0.0142526232131727	4.33771892960919e-18							0.883765031976904	0.859419	0.908801199531494	1.99049162436822e-17
tiraUE	aGwo0E	outcome	UBXN1	Weighted median	27	-0.0650228	0.314949769439353	0.836435903693138							0.937046101463113	0.505440807192253	1.73720717396139	0.870385941320923
3ieAeZ	aGwo0E	outcome	UBTF	Weighted median	178	0.252148893504181	0.0630356363177535	6.33155333750117e-05							1.28678761733946	1.13723405456282	1.45600843159299	0.0001283167451009
Gyd2TW	aGwo0E	outcome	UBTD1	Weighted median	302	0.354782840805349	0.108698369172829	0.0010988197419423							1.42587097966473	1.15227014681584	1.76443697362837	0.0019568505717594
MyW14G	aGwo0E	outcome	UBR2	Weighted median	220	0.649143686703766	0.0479234592666306	8.432291496921469e-42							1.91390122803878	1.74231328873733	2.10238763279075	8.891792888418599e-41
mU8bLX	aGwo0E	outcome	UBQLN1	Weighted median	158	-0.763753	0.0957919786613225	1.5482585743333602e-15							0.465914713473616	0.386159432171585	0.562142219368984	6.29121716958305e-15
oX0XiG	aGwo0E	outcome	UBN2	Weighted median	31	0.260712907880201	0.225507105351042	0.24763274157445							1.29785500799731	0.834200899778157	2.01921098650413	0.304884621741578
d8Tw8v	aGwo0E	outcome	UBN1	Weighted median	336	-0.0520055	0.0991831107219904	0.600043195506921							0.949323632998258	0.781606071506677	1.15303014270573	0.660471314030444
tfrLbg	aGwo0E	outcome	UBLCP1	Weighted median	256	0.301845190959171	0.0414560175331688	3.31122046418041e-13							1.35235185421011	1.2468138740725	1.46682321685424	1.1936969103320599e-12
sTkiuJ	aGwo0E	outcome	UBIAD1	Weighted median	153	-0.699185	0.141423873906165	7.65770964022675e-07							0.496990318211328	0.376673872200329	0.655738012708334	1.8417498143037e-06
fXFbuP	aGwo0E	outcome	UBE3D	Weighted median	315	1.06802006708112	0.0775424767748191	3.68685172447937e-43							2.90961295470417	2.49936528240772	3.38719898438651	4.0439950209692297e-42
wf7Cdi	aGwo0E	outcome	UBE2V1	Weighted median	22	0.755359962406069	0.307693876413749	0.0140920898473149							2.1283775213754	1.16448620575574	3.89011982375194	0.0217559848352156
1OA9Yg	aGwo0E	outcome	UBE2T	Weighted median	3	0.0847948447954819	1.57644120730517	0.957103451109936							1.08849373363567	0.0495372720756597	23.9177201028453	0.967403518939055
cYG8XF	aGwo0E	outcome	UBE2S	Weighted median	46	0.978389372663493	0.192578764092043	3.76515169951223e-07							2.66016824997473	1.82382326914754	3.88003335514039	9.26805129103151e-07
8DT7KH	aGwo0E	outcome	UBE2Q2P1	Weighted median	339	0.203454755501777	0.0510850723080307	6.81466354287893e-05							1.22562970338578	1.10885506917052	1.35470199089698	0.0001377853904431
FGqKaY	aGwo0E	outcome	UBE2N	Weighted median	63	0.359369370668866	0.172986030021202	0.0377602892982528							1.43242579994323	1.02052454185012	2.01057749049641	0.0545459524035551
gE8WW6	aGwo0E	outcome	UBE2L6	Weighted median	285	-0.585194	0.0569935346974419	9.849194006118281e-25							0.556997574554073	0.498126249241942	0.622826639895527	5.96298690544438e-24
EAS460	aGwo0E	outcome	UBE2K	Weighted median	677	-0.0708221	0.0342716335164112	0.0387820541147903							0.931627656877361	0.871103521476815	0.996356999667922	0.0559140202951318
SGCKIu	aGwo0E	outcome	UBE2J2	Weighted median	45	3.92289382176167	0.36464300790302	5.42326882963922e-27							50.5465059174853	24.7343638633604	103.295531454968	3.5609482986532e-26
6dAgF0	aGwo0E	outcome	UBE2I	Weighted median	695	-0.115773	0.0255194707251851	5.71489315926538e-06							0.89067697108667	0.847222754696967	0.936359962508176	1.27527380074614e-05
NCLs9P	aGwo0E	outcome	UBE2G2	Weighted median	358	0.19012731295507	0.036265728292769	1.58315193124607e-07							1.20940356059748	1.1264222793756	1.29849790719395	4.00740148892501e-07
xq1WhE	aGwo0E	outcome	UBE2FP3	Weighted median	78	0.177170788477801	0.0609550423360436	0.0036540188761808							1.19383496897392	1.05939596938356	1.34533448713635	0.0061101913938519
VClpZ6	aGwo0E	outcome	UBE2F	Weighted median	658	-0.0665663	0.011954796175962	2.5743313425777e-08							0.935600882726146	0.913933286135708	0.957782176267038	6.90106307001824e-08
1evkM8	aGwo0E	outcome	UBE2E2	Weighted median	1555	0.17021020783061	0.0211208650215452	7.70058471687994e-16							1.18555403787134	1.13747775133799	1.23566230201841	3.1758242488356303e-15
WISrhP	aGwo0E	outcome	UBE2D4	Weighted median	258	-0.517337	0.0742920846598282	3.3179670519211098e-12							0.596105952690732	0.515329209561859	0.689544276241283	1.12953091418177e-11
OFzaXw	aGwo0E	outcome	UBC	Weighted median	12	0.105913641362257	0.464852130362763	0.819767732245604							1.11172586522962	0.447000067148259	2.7649534983417	0.856577522760778
sBD8L4	aGwo0E	outcome	UBASH3B	Weighted median	305	-0.0590892	0.0706344418314721	0.402846271279718							0.942622727728511	0.820753335181929	1.08258787231536	0.468719131889589
p1nL4K	aGwo0E	outcome	UBALD2	Weighted median	341	-0.781464	0.0722056701087127	2.6859525071397e-27							0.457735436844544	0.397330431232999	0.527323642171268	1.7816073000835498e-26
uABKer	aGwo0E	outcome	UBALD1	Weighted median	36	-1.46091	0.305548494981765	1.74182464237346e-06							0.23202435377328	0.127480994297435	0.422300602851445	4.06593095857004e-06
VzaJTK	aGwo0E	outcome	UBAC2-AS1	Weighted median	441	0.217591806850169	0.0240028763085956	1.2433154878346999e-19							1.24307954748701	1.18595240524483	1.30295849525386	6.10329044569732e-19
odVtge	aGwo0E	outcome	UBAC2	Weighted median	529	-0.428426	0.0411583343457413	2.2504774548224e-25							0.651533583104611	0.601038268536778	0.706271184606205	1.3948104089899701e-24
elZCzZ	aGwo0E	outcome	UBAC1	Weighted median	128	-0.110712	0.0675416424916284	0.101178990264626							0.895196647091824	0.78419819823962	1.02190624610384	0.135642062794587
kMPRii	aGwo0E	outcome	UAP1	Weighted median	287	-0.522576	0.0439736479442025	1.43602633076302e-32							0.592990967114761	0.544022614296334	0.646367040338068	1.15094109050431e-31
xMFHts	aGwo0E	outcome	U73169.1	Weighted median	4	0.340466308370671	1.10821	0.758675209813279							1.40560288215753	0.160152045925213	12.3365234013444	0.804257910229071
70YqW0	aGwo0E	outcome	U7	Weighted median	193	0.0746007992572645	0.0301390351032996	0.0133153422661311							1.07745394460606	1.0156494808376	1.14301934343506	0.0206225422902274
KdRARO	aGwo0E	outcome	U6atac	Weighted median	11	-0.523606	0.244883214226831	0.0325016956643548							0.592380731660024	0.366565952022433	0.957303670201727	0.0474786738492008
KdQ6sJ	aGwo0E	outcome	U62631.5	Weighted median	9	-0.316245	0.280824341777119	0.260109644005399							0.728880646740062	0.420352769799265	1.26385987047477	0.318499894482693
IorjZL	aGwo0E	outcome	U47924.25	Weighted median	18	0.189187268199642	0.0990626348784479	0.0561622874393167							1.20826720132111	0.995036861115889	1.46719150499724	0.0788368894233268
BhKUb3	aGwo0E	outcome	U3	Weighted median	203	0.0961643411590277	0.0240828626931186	6.52257643491359e-05							1.10093997887984	1.05018036990691	1.15415301202343	0.0001320796998049
fsl21A	aGwo0E	outcome	U2SURP	Weighted median	17	1.07534653341216	0.257523137300386	2.97034785333592e-05							2.93100841691615	1.76933042543914	4.85540191731068	6.21296816115645e-05
Z8EfDa	aGwo0E	outcome	U2AF2	Weighted median	83	0.638772307442373	0.266106774861305	0.016375549792263							1.89415401247455	1.12434768138301	3.1910230993319	0.0250573402213705
as2Sfo	aGwo0E	outcome	U2	Weighted median	110	-0.0841643	0.0616372310583471	0.172102739402058							0.919280199269494	0.814669083964288	1.03732435832315	0.220149442911366
hIm3E7	aGwo0E	outcome	U1	Weighted median	224	-0.0417977	0.0272983943393946	0.125734188917167							0.959063750249005	0.909097814886189	1.01177591891675	0.165220931351069
BA5JvR	aGwo0E	outcome	TYW5	Weighted median	24	-2.64432	0.416779400325657	2.22915351784878e-10							0.0710533608243994	0.0313917001339554	0.160825315701248	6.83211559292035e-10
RSNx0z	aGwo0E	outcome	TYW3	Weighted median	569	-0.290648	0.0386830944841174	5.754153561403071e-14							0.747779087284166	0.693179324556323	0.80667951794068	2.1555387351683e-13
axa0G2	aGwo0E	outcome	TYSND1	Weighted median	771	-0.240636	0.0260431376919208	2.4670236876240603e-20							0.786127509211849	0.747006924515522	0.827296830133713	1.2499063812910602e-19
Ve94HT	aGwo0E	outcome	TYROBP	Weighted median	200	1.08535384295399	0.101387096434769	9.63795829368399e-27							2.96048718095706	2.42694953639269	3.61131709464312	6.28241263468624e-26
4NcA6l	aGwo0E	outcome	TYMP	Weighted median	1050	0.0338167521219586	0.0159403883394461	0.033883870796222							1.03439503866378	1.0025769055047	1.06722296328342	0.0493503793910895
OGrnRN	aGwo0E	outcome	TYK2	Weighted median	606	-0.598201	0.0399070813498816	8.555989182237899e-51							0.549799980127558	0.508434633807171	0.594530738169394	1.14395543591366e-49
3253rF	aGwo0E	outcome	TXNRD3	Weighted median	555	-0.458064	0.0979445466762473	2.91425943656252e-06							0.632506795158836	0.522027178381734	0.766367849203347	6.67036503634628e-06
sSoB6t	aGwo0E	outcome	TXNRD2	Weighted median	258	0.140872926267505	0.0573154563591698	0.0139770644677114							1.15127834145309	1.0289456444609	1.28815533321338	0.0215898732419831
eKs6xl	aGwo0E	outcome	TXNRD1	Weighted median	1147	-0.208553	0.0299343856773468	3.2375863153950098e-12							0.811757992785347	0.765501260222533	0.860809868110911	1.10262289217882e-11
zjHnVu	aGwo0E	outcome	TXNL4A	Weighted median	435	0.602614950150717	0.0553969743368022	1.46553896929949e-27							1.82688978544761	1.6389190037505	2.03641929865675	9.818554610835729e-27
LjD6nl	aGwo0E	outcome	TXNDC17	Weighted median	234	-0.26727	0.023889637113487	4.68476216767635e-29							0.765466467065738	0.730450684831674	0.80216080889448	3.3205352276860097e-28
yOsrwK	aGwo0E	outcome	TXNDC15	Weighted median	541	-0.218273	0.030748406799526	1.25962192535678e-12							0.803906085143048	0.756888216059774	0.853844702582851	4.3965735465876e-12
EGNhDb	aGwo0E	outcome	TXN	Weighted median	416	0.108034704503257	0.0539516588311672	0.0452379383764736							1.11408640853096	1.00229207599334	1.23835013306208	0.0645959266319708
ALrgsx	aGwo0E	outcome	TXLNA	Weighted median	158	1.51887130838357	0.145934016607439	2.2812348609512604e-25							4.56706747418174	3.4309618198958	6.07937552460501	1.4136960089761001e-24
qZNU1k	aGwo0E	outcome	TWSG1	Weighted median	626	0.158676765876709	0.0413385829527416	0.0001238051007109							1.17195906828883	1.08074772904806	1.2708683264634	0.0002439025158681
pfeqeo	aGwo0E	outcome	TWF2	Weighted median	325	-0.713237	0.0709928978528319	9.50945185562264e-24							0.490055295197577	0.426397560758785	0.563216618603127	5.5485467110349e-23
Lv9ku4	aGwo0E	outcome	TWF1	Weighted median	36	0.395842715618752	0.259601544729565	0.127306798456754							1.4856356318932	0.893171817273711	2.47109591689494	0.167114063083805
WAtE9c	aGwo0E	outcome	TVP23C	Weighted median	227	0.0148002057171326	0.0543879625657331	0.785527584013908							1.01491027108811	0.912287405529083	1.12907714401995	0.827503235452995
cVD7Dv	aGwo0E	outcome	TUSC3	Weighted median	158	0.132169872261673	0.171066861829757	0.439746635032278							1.14130217838342	0.816179333331464	1.59593683543289	0.5059327263441
taQeHX	aGwo0E	outcome	TUSC1	Weighted median	123	-0.187472	0.0945620613859716	0.0474196734702303							0.82905203277067	0.688793336196728	0.997871548578501	0.0674441954354337
rCANMh	aGwo0E	outcome	TULP3	Weighted median	161	0.68374776845939	0.0908831652612784	5.338167454791e-14							1.98128924858658	1.65800780560745	2.36760470806503	2.00304942100137e-13
6NpMyz	aGwo0E	outcome	TULP2	Weighted median	38	-0.473166	0.328649644920145	0.149944399625527							0.623026602989624	0.327155605417967	1.18647561467542	0.194244366863329
zrhtaG	aGwo0E	outcome	TUBGCP5	Weighted median	154	0.245851170368568	0.0798801933082318	0.0020857063819479							1.27870924955285	1.09339331279225	1.49543382583562	0.0035912502574716
fv13l1	aGwo0E	outcome	TUBGCP3	Weighted median	332	0.0798953447043719	0.0441174103010221	0.0701453617131426							1.08317370187891	0.993446787085975	1.1810046433222	0.0968256860775183
a3ak7t	aGwo0E	outcome	TUBE1	Weighted median	222	0.375071521485395	0.0418691568455698	3.30075759955227e-19							1.45509548148688	1.34045347925636	1.57954221687583	1.58966004767675e-18
VagClP	aGwo0E	outcome	TUBB6	Weighted median	1598	0.108380117783584	0.0150640134112643	6.26268660679557e-13							1.11447129524057	1.08204703672358	1.14786716821117	2.22330774960852e-12
2C5u8v	aGwo0E	outcome	TUBB4A	Weighted median	127	0.022850707372796	0.0680871750432846	0.737165308212354							1.02311378480006	0.895296656624768	1.16917873969747	0.785145259607082
Zso2ef	aGwo0E	outcome	TUBB1	Weighted median	4	-2.22794	1.03143477866614	0.0307697234857861							0.107750341981793	0.0142706465191269	0.813567639113782	0.0451448280282813
IbqQIs	aGwo0E	outcome	TUBA4A	Weighted median	110	-1.54575	0.306871589201556	4.72606598964908e-07							0.213152635325251	0.116809008152315	0.388960121011001	1.15368039374757e-06
QynHM6	aGwo0E	outcome	TUBA1A	Weighted median	118	-0.451805	0.105959562120061	2.00851560349553e-05							0.636477995946895	0.51711697452698	0.78338994711039	4.26542992561104e-05
7yqNIo	aGwo0E	outcome	TUB	Weighted median	260	-0.0751963	0.111951695016523	0.501783899133757							0.927561354374357	0.744813327844059	1.15514859088145	0.567320348977137
QGE5c9	aGwo0E	outcome	TTYH3	Weighted median	237	0.570334406193767	0.0896167004948008	1.96370138541765e-10							1.76885846976943	1.48391768254565	2.1085133783887	6.03763626735052e-10
gzD93d	aGwo0E	outcome	TTYH2	Weighted median	256	-0.324519	0.0558779939216472	6.3362516906294305e-09							0.722875090827124	0.647886530676802	0.806543078449945	1.76837360851563e-08
WxS5eq	aGwo0E	outcome	TTPAL	Weighted median	161	-0.13239	0.128069229425358	0.30125716161278							0.875998903000343	0.681536050833233	1.12594788950581	0.362655219551065
dyiRUs	aGwo0E	outcome	TTN-AS1	Weighted median	36	1.88631223370261	0.277253217489094	1.0205643092605e-11							6.59500295148296	3.83011920766148	11.355799016142	3.3792854269702594e-11
V4X2l7	aGwo0E	outcome	TTLL9	Weighted median	50	0.632312499345453	0.15037581264795	2.61218776390215e-05							1.88195757677717	1.40154599088286	2.52704109877835	5.48961681555461e-05
omv8ff	aGwo0E	outcome	TTLL2	Weighted median	152	-0.554042	0.128286654561188	1.56893666605177e-05							0.574622536038063	0.446871697508228	0.738894543476286	3.36357308249242e-05
H5z9I8	aGwo0E	outcome	TTLL10	Weighted median	3	-1.9413	1.13896126852406	0.0882978598974511							0.143517601844229	0.0153957824080865	1.33785354281833	0.119721681098742
LHYF67	aGwo0E	outcome	TTLL1	Weighted median	221	0.220388756979971	0.0788987832315212	0.0052171674218553							1.24656124578721	1.0679566414773	1.45503560645405	0.0085512664524044
MbgWaM	aGwo0E	outcome	TTL	Weighted median	352	0.348956072182627	0.0717508326305264	1.1536135918388e-06							1.41758691747502	1.23161268943549	1.63164336145108	2.73224853912518e-06
qbkKQB	aGwo0E	outcome	TTK	Weighted median	138	-0.76681	0.118707764576591	1.04948603890942e-10							0.464492407694244	0.368071787707205	0.58617151330605	3.2742506334223003e-10
HqMCxf	aGwo0E	outcome	TTI2	Weighted median	127	0.215940501633678	0.0618484621106361	0.0004804154282163							1.24102853763342	1.09934826285138	1.40096808560544	0.0008908811005657
hYmDKd	aGwo0E	outcome	TTF1	Weighted median	89	-0.446412	0.25402143181159	0.0788528899325224							0.639919790747986	0.388953902953863	1.05281714743333	0.107862701332828
w7vJ9W	aGwo0E	outcome	TTC9C	Weighted median	300	0.154790556695403	0.041445611384484	0.0001878736596208							1.16741342857186	1.07633005619801	1.26620464174716	0.0003634489146841
UvwFIZ	aGwo0E	outcome	TTC7A	Weighted median	148	1.22219952196731	0.102304911454154	6.760690944088249e-33							3.39464612689185	2.77786291237456	4.14837689631389	5.475383847717901e-32
tl7PvN	aGwo0E	outcome	TTC40	Weighted median	307	0.108895745392613	0.0679737761397581	0.109149896932174							1.11504609558859	0.975960801433443	1.27395259467514	0.145373314591438
5q2Xfo	aGwo0E	outcome	TTC4	Weighted median	536	0.0062578664575969	0.0428422576656681	0.883868010570916							1.00627748781182	0.925229967766748	1.09442454065878	0.909399602762308
6t6Skr	aGwo0E	outcome	TTC33	Weighted median	1075	-0.202724	0.0302127914997723	1.9478696462662e-11							0.816503442555997	0.769556255598305	0.866314667518978	6.3485027137148e-11
mZFu4g	aGwo0E	outcome	TTC30B	Weighted median	280	1.15903272367206	0.0980283300175509	2.95315102555422e-32							3.18684922097771	2.62977212207708	3.86193460337723	2.33505954090037e-31
9BN4l4	aGwo0E	outcome	TTC30A	Weighted median	290	1.31785315221666	0.144164741832731	6.170604166105541e-20							3.73539344183605	2.81592346195942	4.95509354348809	3.07088100753613e-19
Qb0Quv	aGwo0E	outcome	TTC24	Weighted median	321	0.0614686644833624	0.0415342800350362	0.13888654734558							1.06339717390688	0.980258933474963	1.15358657886897	0.180987552657176
sdYZql	aGwo0E	outcome	TTC23L	Weighted median	45	-0.350962	0.199159367601531	0.0780327682851527							0.704010595092846	0.476487288245192	1.04017658021538	0.106832557893623
hS29t0	aGwo0E	outcome	TTC22	Weighted median	73	-0.724942	0.175321401546317	3.55059718623186e-05							0.48435262305733	0.343498675050311	0.682964682260144	7.36584163901119e-05
6EHsFT	aGwo0E	outcome	TTC21B	Weighted median	501	-0.457395	0.0441694722320887	3.9527334542634603e-25							0.632930097144958	0.580440802631718	0.69016600152092	2.43123619074922e-24
RYGiXn	aGwo0E	outcome	TTC21A	Weighted median	672	-0.19768	0.0336183071849878	4.099820890462461e-09							0.820632819783858	0.768302773655801	0.876527129665299	1.15858283635463e-08
vo3GqU	aGwo0E	outcome	TTC18	Weighted median	1040	-0.0703545	0.0187444361089627	0.0001744832470565							0.932063317636901	0.898441553361373	0.966943286220511	0.0003387830472541
cldzUQ	aGwo0E	outcome	TTC1	Weighted median	9	4.59008012764821	1.66270651248024	0.0057693960902102							98.5023226051945	3.78549009951362	2563.13114116042	0.0094098869278526
EdfmM8	aGwo0E	outcome	TSTD1	Weighted median	447	0.144401581416963	0.0383461593313311	0.0001660579927756							1.15534798165682	1.07169671673498	1.24552864432128	0.0003230336673923
mrGfOB	aGwo0E	outcome	TSSK4	Weighted median	20	0.263358695369679	0.600059213850033	0.660742804354808							1.3012934031663	0.401415847120597	4.21847949768507	0.716303718670659
3ghO59	aGwo0E	outcome	TSSC4	Weighted median	50	-1.17867	0.362806890910749	0.0011591509814796							0.307688525768134	0.151106741604966	0.626525513579441	0.0020576908349996
Fb6mtO	aGwo0E	outcome	TSPYL1	Weighted median	707	-0.552159	0.0443053202190796	1.1944072497922201e-35							0.575705714096897	0.527821516422232	0.627933987023531	1.05634266669325e-34
FRva8w	aGwo0E	outcome	TSPY26P	Weighted median	108	-0.671021	0.114783661108456	5.0365319237292305e-09							0.511186511222391	0.40820052660659	0.640155100798199	1.41423091183355e-08
8SvmvC	aGwo0E	outcome	TSPO2	Weighted median	52	-0.459242	0.227609611066365	0.0436250181506053							0.63176205891302	0.404397375193294	0.986958184115922	0.0624209103511557
qM4EM0	aGwo0E	outcome	TSPEAR-AS1	Weighted median	169	-0.0268624	0.0508463967121175	0.597287992633587							0.973495203375574	0.881155364051221	1.07551170844392	0.65803975514199
Kyi7C0	aGwo0E	outcome	TSPAN17	Weighted median	179	-0.0576242	0.0640733489649793	0.368467656637761							0.944004638995158	0.832594989087727	1.07032202946694	0.433383511674769
JCunBi	aGwo0E	outcome	TSPAN16	Weighted median	282	0.106231711798778	0.0674784686251226	0.115416881627482							1.11207952860282	0.974309672746793	1.26933039107667	0.15298186850833
PrujSq	aGwo0E	outcome	TSPAN10	Weighted median	433	0.0132348162107604	0.0425470287334442	0.755752553141447							1.01332278404179	0.932247109858334	1.1014494481128	0.801661036001327
BJvUJ9	aGwo0E	outcome	TSHZ1	Weighted median	157	-0.3334	0.0769276165505036	1.46462627314497e-05							0.716483653985333	0.616203523878171	0.833083237170302	3.14923971849673e-05
FEuDY3	aGwo0E	outcome	TSHR	Weighted median	648	-0.0393868	0.0428561330170177	0.358070739407429							0.961378755767207	0.883923426534313	1.04562124308018	0.422654196467368
XBdHhE	aGwo0E	outcome	TSGA10IP	Weighted median	142	0.306948053838592	0.0550139153422029	2.41263550523695e-08							1.35927035736064	1.22032934809469	1.51403054206966	6.48026052657105e-08
BHNWrq	aGwo0E	outcome	TSG101	Weighted median	233	0.387992019376772	0.0979654777117054	7.4793808659389e-05							1.47401802065875	1.21650218948347	1.78604621019981	0.0001506518746361
EbSIiD	aGwo0E	outcome	TSC22D1	Weighted median	190	-0.0750126	0.140178117224452	0.592564435608712							0.927731787713486	0.704856023091631	1.22108096084492	0.653622863543297
r1g6zE	aGwo0E	outcome	TSC2	Weighted median	3	-0.137347	1.35192375660515	0.919078983293389							0.871667467865646	0.0615984953461281	12.3347846447529	0.937950773856995
04dXWm	aGwo0E	outcome	TSC1	Weighted median	208	-0.171466	0.0899279562703065	0.0565582485944432							0.842428517556262	0.706292896276348	1.00480382987509	0.0793543823041458
SadLAm	aGwo0E	outcome	TRRAP	Weighted median	220	-0.14294	0.0853008624280824	0.0937933474325569							0.866805874677131	0.733351671320021	1.02454586763587	0.126547758990895
nZqGdv	aGwo0E	outcome	TRPV5	Weighted median	464	0.170491345143496	0.0314766075677937	6.0795340512636e-08							1.18588738820424	1.11493621200406	1.26135368316187	1.58628509947489e-07
GFaG6p	aGwo0E	outcome	TRPV4	Weighted median	304	0.181651859465045	0.0658228967791794	0.0057853355973725							1.19919663224195	1.05404904550933	1.36433173475866	0.0094340155306639
G0LH74	aGwo0E	outcome	TRPC4AP	Weighted median	2234	0.0858894451758455	0.0077913320701443	2.93674004334256e-28							1.0896858516179	1.07317166225879	1.10645416476706	2.0175743062335198e-27
WtY78n	aGwo0E	outcome	TRPC1	Weighted median	477	-0.603958	0.0574975837519976	8.273939784007219e-26							0.54664356532487	0.488383866614566	0.611853109691099	5.227077329275051e-25
AhSSpH	aGwo0E	outcome	TROVE2	Weighted median	262	-0.0971377	0.0801484550939517	0.225523105878046							0.907431060630771	0.775514457320303	1.06178694932749	0.280727625471002
Z31SKf	aGwo0E	outcome	TRMT61B	Weighted median	480	-0.351925	0.0216923871889445	3.44398589803584e-59							0.703332886391207	0.674056020177507	0.733881360408468	5.632017057949831e-58
TBQdkF	aGwo0E	outcome	TRMT11	Weighted median	71	0.103951512692669	0.125557085010259	0.407714495504197							1.10954665468164	0.867499473630381	1.41912913648608	0.473691717731853
lkqhQW	aGwo0E	outcome	TRMT10C	Weighted median	88	-0.343426	0.183642849336246	0.0614735110508882							0.709336140769106	0.494916734326667	1.01665133890806	0.0856981935203228
1ZFSq4	aGwo0E	outcome	TRMT10A	Weighted median	295	-0.273348	0.123698622409412	0.0271196708085188							0.760827895659043	0.597024336283096	0.969573686755852	0.0401303868972999
Bym5oS	aGwo0E	outcome	TRMT1	Weighted median	4	-0.336924	1.10743034235165	0.760945427339189							0.713963054253315	0.0814726796677878	6.25661565223146	0.806387673412942
bf58dQ	aGwo0E	outcome	TRIT1	Weighted median	650	0.116807257033257	0.0255987307900254	5.04254827702455e-06							1.12390278445578	1.06890391473268	1.18173153966168	1.13060276177655e-05
e6UczQ	aGwo0E	outcome	TRIQK	Weighted median	188	-0.520223	0.105630890878918	8.43989982687522e-07							0.594388176162864	0.483231606376403	0.731113816439859	2.02141063240954e-06
ZYPd3P	aGwo0E	outcome	TRIP12	Weighted median	449	-0.217519	0.034382504456517	2.50868383533885e-10							0.804512210374825	0.752082808201833	0.860596585354321	7.65938492783173e-10
0Lwqy6	aGwo0E	outcome	TRIOBP	Weighted median	907	0.0268945296773672	0.0117926859522898	0.0225714739225899							1.02725945166388	1.00378802169815	1.05127971067791	0.0338257151670724
asiFCW	aGwo0E	outcome	TRIM7	Weighted median	382	0.39071202734004	0.061421325834834	2.00211396588657e-10							1.47803281907951	1.31039186845216	1.66712039876785	6.15305979823915e-10
q824WS	aGwo0E	outcome	TRIM47	Weighted median	402	0.469388207492778	0.0531709504920439	1.0665265285635499e-18							1.59901562812827	1.44076344686162	1.77465008885946	5.01566968973108e-18
1jpEGl	aGwo0E	outcome	TRIM39	Weighted median	6	-2.21315	0.813476409119711	0.0065161318624722							0.109355288975027	0.0222021326921267	0.538622995936441	0.0105463393526968
5XwJW5	aGwo0E	outcome	TRIM31	Weighted median	33	0.104424658021645	0.165645781369169	0.528426760811894							1.11007175571333	0.802325355295476	1.53585985373561	0.593018655771886
fgN9Bo	aGwo0E	outcome	TRIM25	Weighted median	18	-0.46296	0.367641371649878	0.207932993059457							0.629418073555972	0.3061939152825	1.29384384060474	0.260963380429629
sk1z1u	aGwo0E	outcome	TRIM21	Weighted median	157	0.0151358945828369	0.074291858496173	0.838560139598995							1.01525102235581	0.877677426999927	1.17438891178707	0.872210593860858
nAOzgA	aGwo0E	outcome	TRIM16L	Weighted median	708	-0.160028	0.0190344833046572	4.19720163194259e-17							0.852120148391178	0.820915309512514	0.884511153440896	1.83743333826194e-16
L7Mtbu	aGwo0E	outcome	TRIM13	Weighted median	322	0.868004855080499	0.101898625518286	1.61887750034206e-17							2.38215336797626	1.95088584530338	2.90875792769832	7.22339280612345e-17
r3fOLL	aGwo0E	outcome	TRIAP1	Weighted median	103	1.45582477305406	0.265131432487716	3.99766139249482e-08							4.28801864977703	2.55018821277544	7.21009682686299	1.05714840902163e-07
sXXKOt	aGwo0E	outcome	TRGJP2	Weighted median	534	-0.0135751	0.0139572498561738	0.330742110279849							0.986516623335583	0.959895060419893	1.01387650405423	0.394296633063595
8khVto	aGwo0E	outcome	TRGJP1	Weighted median	234	-0.121859	0.039050948795788	0.0018054036362223							0.885273416620923	0.820042922162315	0.955692685096499	0.0031317540674259
1f6TQV	aGwo0E	outcome	TRGC2	Weighted median	722	-0.00631318	0.0105925457435587	0.551174029837655							0.993706709985748	0.973288664674879	1.01455309335237	0.614595431578144
aTlI13	aGwo0E	outcome	TRERF1	Weighted median	674	-0.10768	0.0353329540784382	0.0023068385869082							0.897914538373672	0.837835939389634	0.9623011860892	0.0039490192560043
gdFACy	aGwo0E	outcome	TREML2	Weighted median	582	-0.643218	0.0563970720326571	3.940381387396729e-30							0.525598427299483	0.470595641082171	0.5870298886416	2.89467154916819e-29
ZMshZO	aGwo0E	outcome	TREM1	Weighted median	965	0.0278798301229165	0.018617945135487	0.134270785033849							1.02827210966357	0.991425629065237	1.06648799518011	0.17539343186217
nCZJqH	aGwo0E	outcome	TRDV3	Weighted median	218	-0.677219	0.0885006727758453	1.97671828721097e-14							0.50802787303368	0.427124267555445	0.604255808868602	7.609148631999661e-14
6tnMRR	aGwo0E	outcome	TRDV2	Weighted median	97	-0.486146	0.0807383934703182	1.7307280365446102e-09							0.614991869366604	0.524980855375447	0.720435794018707	5.0130837939384e-09
c3G7bl	aGwo0E	outcome	TRDJ3	Weighted median	19	0.691696385531216	0.17069362319704	5.07234137034155e-05							1.99710051373124	1.42923149548151	2.79059793641191	0.0001037205632115
x7WW9E	aGwo0E	outcome	TRDD3	Weighted median	19	0.778531413297194	0.204566447597993	0.0001413677151373							2.17827093562716	1.45875185463623	3.25268773706632	0.0002768458092887
MOyz3u	aGwo0E	outcome	TRBV7-8	Weighted median	32	-0.415758	0.123758742947889	0.0007810492219092							0.659839811812541	0.517717620789424	0.840976933697799	0.0014132576899967
O1FxoJ	aGwo0E	outcome	TRBV7-6	Weighted median	415	-0.215393	0.0237518051750895	1.2067370940509e-19							0.806224455695985	0.769552091779214	0.844644410568079	5.927265127997299e-19
baMQUv	aGwo0E	outcome	TRBV7-1	Weighted median	800	-0.018065	0.0084665824593845	0.0328691451490225							0.982097232229599	0.965934296953134	0.998530621177267	0.0479660724318203
Jx0bD3	aGwo0E	outcome	TRBV6-9	Weighted median	41	-0.450053	0.114392051230321	8.34396644818924e-05							0.63759461491458	0.509532817186653	0.797842414179876	0.0001673569787827
SAhj1M	aGwo0E	outcome	TRBV6-8	Weighted median	468	-0.129509	0.0225309417585606	9.02868590479412e-09							0.878527007675086	0.840574851035926	0.91819271331204	2.49256311681779e-08
PYpN4B	aGwo0E	outcome	TRBV6-7	Weighted median	566	-0.0709537	0.0145376273503166	1.0571424517927e-06							0.931505037284285	0.90533754144337	0.958428867428418	2.51207352313203e-06
f8SFoZ	aGwo0E	outcome	TRBV5-5	Weighted median	512	-0.0956626	0.0136352470507991	2.28585152887803e-12							0.908770585488396	0.884805278852405	0.933385002087771	7.85858894092981e-12
hzObXv	aGwo0E	outcome	TRBV24-1	Weighted median	535	0.0982761236425203	0.008736302568539	2.3379042218896e-29							1.10326738126146	1.0845367861301	1.12232146490743	1.67390554020307e-28
oCXzAM	aGwo0E	outcome	TRBV23-1	Weighted median	106	0.391444486599027	0.047168645039524	1.05143192000787e-16							1.47911581447951	1.34850145465998	1.62238133676692	4.524729193741189e-16
CvYfmX	aGwo0E	outcome	TRBV1	Weighted median	299	0.258533693059523	0.0334429516684041	1.0705065153893601e-14							1.29502978263336	1.21286521629367	1.38276052060621	4.1794083593947204e-14
8VlQth	aGwo0E	outcome	TRBJ2-6	Weighted median	46	-0.0215378	0.0879124463380024	0.806462754867669							0.978692451473452	0.823784571003311	1.16272985472954	0.845303279628444
89vKdM	aGwo0E	outcome	TRBJ2-5	Weighted median	12	-0.148694	0.177555241174577	0.402339593511135							0.861833087435594	0.608534340278465	1.22056590965579	0.468184735325182
lW5mYI	aGwo0E	outcome	TRBJ2-4	Weighted median	31	0.33584522385057	0.116674740219052	0.0039960402708623							1.3991224572651	1.11311538037017	1.75861701755711	0.0066481352921843
xUo8I5	aGwo0E	outcome	TRBJ2-3	Weighted median	447	-0.152095	0.0179217095012852	2.1272056613659e-17							0.858906792715282	0.829260101083663	0.889613376561118	9.44717199644548e-17
bGpLAd	aGwo0E	outcome	TRBJ2-2	Weighted median	248	-0.346885	0.0332731265115248	1.8987757727405001e-25							0.706886375324406	0.662257604686299	0.754522626970772	1.18142593829596e-24
PFiPF7	aGwo0E	outcome	TRBJ2-1	Weighted median	69	-0.491501	0.0597016154833339	1.83149171982214e-16							0.611707388334625	0.544157582265662	0.687642589459475	7.788687736452901e-16
eQK2HC	aGwo0E	outcome	TRAV8-2	Weighted median	298	0.775416021926261	0.0392089993712063	4.74685317375052e-87							2.17149532896417	2.0108678260762	2.34495370733258	1.38680536571731e-85
NBF48z	aGwo0E	outcome	TRAV41	Weighted median	265	-0.0050734	0.0287836449942117	0.86008973581768							0.994939444556046	0.940362962802016	1.05268341852157	0.889782849236857
IpqFBt	aGwo0E	outcome	TRAV40	Weighted median	13	0.0625943757081688	0.187392633602225	0.738358473934051							1.06459492607702	0.737348094050778	1.53707911605571	0.786195738684913
gLZkw2	aGwo0E	outcome	TRAV35	Weighted median	254	-0.0203427	0.0246046614770234	0.408359546542937							0.979862779117907	0.933730081093734	1.02827475021048	0.47427384812894
2zAfJL	aGwo0E	outcome	TRAV34	Weighted median	93	0.285857093384311	0.0656356071690899	1.32937183626924e-05							1.33090224692568	1.17024286399507	1.51361810900074	2.86877896419033e-05
MekNdW	aGwo0E	outcome	TRAV30	Weighted median	34	-0.652639	0.277079368195573	0.018501627037091							0.520669841801709	0.30248768873933	0.896225182888142	0.028087882751933
Av8mbx	aGwo0E	outcome	TRAV3	Weighted median	232	0.447025994114687	0.0988197046263254	6.07815168930327e-06							1.56365494458411	1.28832042388035	1.8978328220227	1.35333931812984e-05
qsa3bQ	aGwo0E	outcome	TRAV27	Weighted median	360	-0.141443	0.0306026990766348	3.80232559162439e-06							0.868104863696202	0.817565668416127	0.921768224236918	8.62313125243388e-06
P7KMFa	aGwo0E	outcome	TRAV24	Weighted median	101	0.266365798412711	0.0420388808046678	2.35535875945815e-10							1.30521241600336	1.20197927279761	1.41731183677089	7.20506432157962e-10
U8FZTs	aGwo0E	outcome	TRAV21	Weighted median	141	1.09124825163709	0.122204925612869	4.27325895322356e-19							2.97798903316376	2.34368996959524	3.78395555585162	2.0480385338194002e-18
qS9PtZ	aGwo0E	outcome	TRAV18	Weighted median	70	-0.0121521	0.0668965606566916	0.855853431280178							0.987921439430435	0.866520633167845	1.12633067595663	0.886483710699737
zK7HVS	aGwo0E	outcome	TRAV12-1	Weighted median	367	0.464520310602802	0.0214965774324783	1.4770074999233999e-103							1.59125069969398	1.52559884593144	1.65972778232579	5.78656633772528e-102
5N1XIO	aGwo0E	outcome	TRAV1-2	Weighted median	3	-2.04347	1.19269122648061	0.0866529561385515							0.129578751946152	0.0125110720411313	1.34206348590445	0.11768194166954
kR9ya0	aGwo0E	outcome	TRAPPC2P1	Weighted median	807	-0.155289	0.0327715327794281	2.15261476696769e-06							0.856167467277202	0.802902905628956	0.912965598810038	4.9836275051551e-06
ZvxibT	aGwo0E	outcome	TRAPPC1	Weighted median	28	-2.09151	0.557742629963561	0.0001768694045588							0.123500840873511	0.0413913702075058	0.368493664742187	0.0003431598473636
bt4y0u	aGwo0E	outcome	TRAP1	Weighted median	726	0.0397172134312001	0.0294852419749521	0.177973760997954							1.04051648849677	0.98208849179871	1.10242057805881	0.226895763066292
7zr00g	aGwo0E	outcome	TRAK2	Weighted median	85	0.25596524767009	0.200049882263174	0.200718535787162							1.29170783730277	0.872726969680502	1.9118340499552	0.252768234093631
KyCbhM	aGwo0E	outcome	TRAJ49	Weighted median	14	-0.231113	0.125141069680664	0.0647737251677321							0.793650092162324	0.621021794771975	1.01426467491458	0.0899563248660913
zqt3Ry	aGwo0E	outcome	TRAJ37	Weighted median	82	0.0114599877342951	0.0415761414024581	0.782825690147469							1.01152590495659	0.932366548331452	1.09740601293486	0.825237657271155
OkPN6s	aGwo0E	outcome	TRAJ32	Weighted median	23	0.118593141537962	0.321545426856794	0.712260140802724							1.12591173836922	0.599514034107486	2.11450803563728	0.762746574817961
boRFAv	aGwo0E	outcome	TRAJ31	Weighted median	34	-1.82609	0.242311415820327	4.8418795573270205e-14							0.161042632329044	0.100156979685392	0.258940809806093	1.8211143949038999e-13
fUqB8a	aGwo0E	outcome	TRAJ3	Weighted median	44	0.445659858838652	0.0721935251667221	6.69520393667831e-10							1.56152023888515	1.35548666134283	1.79887086017678	1.99206914047048e-09
4NM5xb	aGwo0E	outcome	TRAJ1	Weighted median	23	0.708220133340552	0.206883442083202	0.0006187010887786							2.0303742452755	1.35354704412639	3.04564188867092	0.0011331957842631
BWhQn6	aGwo0E	outcome	TRAF5	Weighted median	920	-0.0284667	0.035874899961792	0.427487646560766							0.971934691337376	0.905940660984412	1.04273611386269	0.493513730202708
KzZG4a	aGwo0E	outcome	TRAF4	Weighted median	4	-1.11	1.04452050759897	0.287925370180321							0.329560601799643	0.0425423505211619	2.55298987780462	0.348406129840997
KbCgsi	aGwo0E	outcome	TRAF3IP3	Weighted median	1121	0.399982435364588	0.0202848172922963	1.50145119982057e-86							1.49179849451448	1.43365079368207	1.55230461842105	4.33525386468356e-85
ITMrSg	aGwo0E	outcome	TRAF3IP2-AS1	Weighted median	23	0.106354986720988	0.371530498260503	0.774677618656286							1.11221662857052	0.536952957962772	2.30378808892704	0.818254476919449
d8CKs9	aGwo0E	outcome	TRAF3IP2	Weighted median	1226	-0.257936	0.0249475696715239	4.68902352407784e-25							0.772645057931841	0.735773650866866	0.811364180877032	2.87409217320121e-24
UBlCnR	aGwo0E	outcome	TRAF3IP1	Weighted median	277	0.630135145052468	0.0856890923837075	1.92739177781928e-13							1.87786434619188	1.58753821507062	2.22128479757055	7.04699052690985e-13
OJZE7d	aGwo0E	outcome	TRAF1	Weighted median	703	-0.542424	0.0314483900750078	1.15683987974571e-66							0.581337214464597	0.546586266298452	0.618297563914503	2.2491680668664802e-65
VPc0bi	aGwo0E	outcome	TRABD	Weighted median	972	0.0578013141474783	0.0365202165673444	0.113485066803112							1.05950446624824	0.986316176140764	1.13812359682902	0.150643597153831
biZF5o	aGwo0E	outcome	TRA2B	Weighted median	4	-3.69811	1.42227852219062	0.0093189173551545							0.0247704153278288	0.0015249842882814	0.402347407922852	0.0147738423110423
TtJZEm	aGwo0E	outcome	TPX2	Weighted median	3	-0.18112	0.911026555020241	0.842412003799361							0.834334852755871	0.139913276352642	4.97532946600901	0.875258790378343
yhERwT	aGwo0E	outcome	TPTEP1	Weighted median	276	0.0021180391982288	0.0498584805172212	0.966115240493981							1.00212028382771	0.908823309564596	1.10499483528877	0.974100804647621
Z0yhdD	aGwo0E	outcome	TPT1	Weighted median	7	-0.422669	1.36408953801335	0.756671520320153							0.655295216190864	0.0452168747042357	9.49671606389031	0.802412368080917
sXM2Lh	aGwo0E	outcome	TPST2	Weighted median	374	0.245887466118305	0.0697510383064301	0.000423137849405							1.27875566210604	1.11535800159092	1.46609074488712	0.0007890789360621
3mtgcG	aGwo0E	outcome	TPST1	Weighted median	4483	0.0096983115733808	0.0057886604917006	0.093856122604557							1.00974549259915	0.998353893331867	1.02126707436535	0.126622082116741
iUFUsF	aGwo0E	outcome	TPSD1	Weighted median	197	-0.277581	0.0507331136431478	4.46524874403914e-08							0.757614542654698	0.685904108643657	0.836822214663365	1.17651564640942e-07
VyF6fy	aGwo0E	outcome	TPRG1L	Weighted median	78	-0.283568	0.14233958033108	0.0463495284212088							0.753091624267437	0.569752081754597	0.995427682853203	0.0660647937851407
1APjI9	aGwo0E	outcome	TPRG1-AS1	Weighted median	37	-0.0251691	0.142807380841226	0.860101207726375							0.975144967556122	0.737070597648472	1.29011754204248	0.889782849236857
Wty8z2	aGwo0E	outcome	TPPP	Weighted median	736	-0.320317	0.0387128138730105	1.2933987765953e-16							0.725918964946241	0.672876142536943	0.783143152738084	5.54187161839874e-16
RQ6KW3	aGwo0E	outcome	TPP2	Weighted median	822	0.0141923152810786	0.012594725833867	0.259807636320838							1.01429350432317	0.989561515749153	1.03964361642876	0.318161634454374
jcYWqn	aGwo0E	outcome	TPM4	Weighted median	108	-0.147626	0.0999671006958681	0.139743261802063							0.862753557946079	0.709239712315607	1.04949523951274	0.181993366447179
wuqYev	aGwo0E	outcome	TPM2	Weighted median	2215	0.137966013456574	0.0110355645383648	7.284749820061329e-36							1.14793653521628	1.12337360697652	1.17303653984806	6.48798441248405e-35
teTSRS	aGwo0E	outcome	TPI1	Weighted median	207	0.0939326296313648	0.0372538053380517	0.0116881003209088							1.09848573803512	1.02113542623869	1.18169528317246	0.0182539506260505
1HPpBM	aGwo0E	outcome	TPGS1	Weighted median	89	0.0405953284531425	0.070529620070166	0.564900159665921							1.04143058293719	0.90697288290361	1.19582148432563	0.628086390474996
By5wYR	aGwo0E	outcome	TPD52L1	Weighted median	305	0.374011539806777	0.0536037511074651	3.00823371228324e-12							1.45355392409149	1.30858733828667	1.61458005012344	1.0264228889283e-11
XhAnTV	aGwo0E	outcome	TP73	Weighted median	10	-0.259946	0.457156720174522	0.569617053070526							0.771092891311616	0.314750945333188	1.88906262506025	0.632292079109406
udioUZ	aGwo0E	outcome	TP53TG5	Weighted median	121	1.20807905137759	0.102913262411528	8.06144081387573e-32							3.34704896411783	2.73564997113962	4.09509143581531	6.2856590992408805e-31
VigL8w	aGwo0E	outcome	TP53TG3D	Weighted median	68	-0.00689371	0.157131540823022	0.965006273192343							0.993130000318831	0.729882638616474	1.35132300091816	0.973320367377581
RkltyC	aGwo0E	outcome	TP53RK	Weighted median	139	0.758248007578886	0.192350377748026	8.08000389364866e-05							2.13453325654391	1.46410080229109	3.11196620899474	0.0001622470561955
6ccYAs	aGwo0E	outcome	TP53INP1	Weighted median	1102	0.0878117359425719	0.0206426532549634	2.10081273309841e-05							1.09178255926433	1.04849115510416	1.13686143265114	4.45492773547069e-05
8nmzBL	aGwo0E	outcome	TP53	Weighted median	201	0.0259272770152352	0.139911149126363	0.85298397801398							1.02626631261019	0.78012698187536	1.35006552634117	0.884096784397139
QZq9mw	aGwo0E	outcome	TOX4	Weighted median	87	-0.485288	0.176807654451574	0.0060562449367559							0.61552014905906	0.435251784440854	0.870450317359173	0.0098487991247424
SVAIql	aGwo0E	outcome	TOX2	Weighted median	246	0.358179449389932	0.113180469841534	0.0015525604844858							1.43072233969618	1.14607805695655	1.78606195353002	0.002716142413508
wOFrjR	aGwo0E	outcome	TOX	Weighted median	767	-0.107459	0.0333737467846967	0.0012825126501309							0.898113400256394	0.841245723585156	0.958825295756112	0.0022653642409245
HnsqXL	aGwo0E	outcome	TOR2A	Weighted median	88	-1.12897	0.228086344464637	7.43119586021603e-07							0.3233666245986	0.206796972970641	0.50564557305748	1.78892587994471e-06
kcCPJy	aGwo0E	outcome	TOR1B	Weighted median	886	-0.0274889	0.0159909940793961	0.0856101830470584							0.972885494461627	0.942865878400398	1.00386089582499	0.116361732001921
IQaPdr	aGwo0E	outcome	TOP2A	Weighted median	5	-7.52596	1.94568077272383	0.0001097164389011							0.000538911559844	1.18937988706049e-05	0.0244182428585843	0.000217264759942
IbPsfF	aGwo0E	outcome	TOMM70A	Weighted median	666	0.470439791381544	0.0441242407770996	1.53746819123295e-26							1.60069801162935	1.46808125497132	1.74529448949622	9.96399594011302e-26
ExQK7e	aGwo0E	outcome	TOMM5	Weighted median	328	-0.00575281	0.0410415358324947	0.888525247338295							0.994263701488669	0.917416029251851	1.07754854567357	0.913070620498293
AAKUQf	aGwo0E	outcome	TOMM40	Weighted median	11	-1.11917	0.749324566878826	0.135288756771876							0.326551811428166	0.0751820475013629	1.41837166040314	0.176615766477313
dyhsfO	aGwo0E	outcome	TOMM22	Weighted median	316	0.0643683937107629	0.048501654936682	0.184463007231746							1.06648521284698	0.969771453722651	1.17284408079365	0.234328257811004
quYlWH	aGwo0E	outcome	TOMM20	Weighted median	209	0.629986744258387	0.0999749065725267	2.94876397649287e-10							1.87758569030862	1.54347432010297	2.28402117128616	8.96478687573399e-10
8wT0rM	aGwo0E	outcome	TOM1L2	Weighted median	332	0.920194336631255	0.0687587600015484	7.60778572568424e-41							2.50977808436443	2.1933436647453	2.87186460289042	7.835051870043329e-40
rImCVN	aGwo0E	outcome	TOLLIP	Weighted median	228	0.55173582493676	0.083928010757124	4.9008368266894596e-11							1.73626425441117	1.47290541636322	2.0467122516186	1.55671601458844e-10
SGSVON	aGwo0E	outcome	TOE1	Weighted median	16	-0.294477	0.464099622626927	0.525746233232868							0.744920975936324	0.29995812447681	1.8499490932536	0.590533641643439
K3jiGi	aGwo0E	outcome	TOB1-AS1	Weighted median	46	-0.34688	0.113049975560652	0.0021522500449402							0.706890199618789	0.566398218514021	0.882230448443265	0.003698737571579
Y7HpM6	aGwo0E	outcome	TNS4	Weighted median	15	2.20482812865853	0.313408580514259	1.99266635818236e-12							9.06869278551078	4.90643353791457	16.761908258301	6.873119883633539e-12
o5SyTt	aGwo0E	outcome	TNRC18	Weighted median	13	0.411751092782238	0.308620324601755	0.182149089298397							1.50945867440678	0.824362644420566	2.76391161725116	0.231752336104683
40iXGf	aGwo0E	outcome	TNKS	Weighted median	514	-0.231435	0.0823236685082296	0.0049344610930562							0.793394266985437	0.675170932330228	0.932318665901157	0.0081161666460333
zEjgeB	aGwo0E	outcome	TNK1	Weighted median	35	-0.00990534	0.191822384068609	0.958817054648552							0.990143551511498	0.679853994652289	1.44205117615176	0.968620543178644
T3KQHc	aGwo0E	outcome	TNFSF9	Weighted median	15	0.661497731572296	0.376077496277749	0.078587709091846							1.93769230511385	0.927173877272474	4.04956563308569	0.107514845677618
cwckTc	aGwo0E	outcome	TNFSF13	Weighted median	653	0.0717954982532804	0.0211377822313818	0.0006824151331324							1.07443559763886	1.03083117730992	1.11988449601045	0.001243895655313
AT473P	aGwo0E	outcome	TNFSF10	Weighted median	308	-0.242086	0.0424390053531785	1.16801116925386e-08							0.784988570477827	0.72233477396726	0.853076825301439	3.20093503049029e-08
EwHkTu	aGwo0E	outcome	TNFRSF21	Weighted median	37	-0.920739	0.314011947861258	0.0033659345806274							0.398224638499898	0.215196775963618	0.736920253559865	0.0056552673983208
tIxifQ	aGwo0E	outcome	TNFRSF1A	Weighted median	72	-0.240932	0.0879326187654569	0.0061447086741889							0.785895333911982	0.661477313760367	0.933715280957276	0.0099837874969071
BjCwVz	aGwo0E	outcome	TNFRSF19	Weighted median	18	-0.108222	0.370860811774953	0.770429166680096							0.897428148951394	0.433827013917313	1.85644797740472	0.81460303316276
HWThGj	aGwo0E	outcome	TNFRSF13B	Weighted median	56	-0.473236	0.206898550368688	0.0221791148510167							0.622982886832801	0.415298646158519	0.934526709577546	0.0332770920820231
bYJcIw	aGwo0E	outcome	TNFRSF12A	Weighted median	4	0.803707651577035	0.900768839104616	0.372260937691354							2.2338077746482	0.382204576531459	13.0555662607772	0.437210134670168
s9PNUr	aGwo0E	outcome	TNFRSF10D	Weighted median	195	-1.06697	0.113736099496082	6.5282303748303e-21							0.344049145337884	0.275300094803065	0.429966486180848	3.3861606517002603e-20
W0AzIG	aGwo0E	outcome	TNFAIP3	Weighted median	97	0.102834565665988	0.172486888360922	0.551049824544101							1.10830804170604	0.790381344430352	1.55411906412792	0.614511455241996
wFt7vC	aGwo0E	outcome	TNFAIP2	Weighted median	249	0.0011447168097895	0.0662814522742354	0.986220783715351							1.00114537224815	0.879178852192959	1.14003203543152	0.98958597294383
J8aGtd	aGwo0E	outcome	TNFAIP1	Weighted median	9	1.68899427672246	1.11702150029488	0.130520706624663							5.41403294716156	0.606307580039658	48.3446912391127	0.170946831107588
ActjKf	aGwo0E	outcome	TNC	Weighted median	16	3.09397230498944	0.422912576571082	2.55724210829364e-13							22.0645512525052	9.63173768899396	50.5459	9.27777277491597e-13
YKYUjt	aGwo0E	outcome	TMX2	Weighted median	691	0.0988884378369785	0.0156343011172428	2.53077043359024e-10							1.1039431344048	1.07062780241914	1.13829515845357	7.72538629082173e-10
lTelj1	aGwo0E	outcome	TMUB2	Weighted median	208	-0.236303	0.0663141225062525	0.000366103843216							0.789541631567463	0.693309760211465	0.899130552825444	0.0006870775021427
3ID1ne	aGwo0E	outcome	TMTC3	Weighted median	57	-0.150991	0.346868527337445	0.663347159604553							0.859855706290171	0.435677494533507	1.69701635938623	0.718674723457792
LJEQyz	aGwo0E	outcome	TMPRSS9	Weighted median	470	-0.0782219	0.0268796468982113	0.0036133552723198							0.924759162969957	0.877300194936175	0.974785500371525	0.0060462874447371
H8oMtg	aGwo0E	outcome	TMPRSS6	Weighted median	37	-0.226096	0.257743955491265	0.380371958281379							0.797641625799285	0.481295416616098	1.32191610649642	0.445714427819523
APFQPm	aGwo0E	outcome	TMPRSS3	Weighted median	357	-0.489849	0.055430204781416	9.81294083905052e-19							0.612718945657863	0.549639791690799	0.68303734926688	4.62143676140718e-18
ZczDRf	aGwo0E	outcome	TMPRSS13	Weighted median	58	0.482024948513418	0.151832801113945	0.001499868738309							1.61935018517779	1.2025359977759	2.18063744211009	0.0026272309000771
cZf0r0	aGwo0E	outcome	TMOD2	Weighted median	2400	0.0560228127582516	0.0056710241028466	5.14543270089195e-23							1.0576218107321	1.04593121716975	1.06944307252157	2.9178123475914197e-22
jDFp8f	aGwo0E	outcome	TMOD1	Weighted median	570	0.109284177272377	0.0343097004677243	0.0014464060459685							1.11547929916912	1.04293323797229	1.19307163830931	0.0025384297651503
yu43qe	aGwo0E	outcome	TMIE	Weighted median	328	-0.208638	0.0771871890988929	0.0068715315356091							0.81168941452089	0.697729074448942	0.944262937825271	0.0110837884437019
u1K5Zj	aGwo0E	outcome	TMEM87B	Weighted median	728	-0.286308	0.0447429811919078	1.56444104583071e-10							0.7510310254526	0.687973775335457	0.819867880744951	4.83685343182769e-10
mD36Br	aGwo0E	outcome	TMEM87A	Weighted median	419	0.500994116735587	0.102997984426801	1.14969629870804e-06							1.65036110706699	1.34866884770736	2.01954081489273	2.72349298705697e-06
WorujW	aGwo0E	outcome	TMEM86B	Weighted median	220	0.307288749925821	0.0481487815741801	1.74713488057131e-10							1.35973353434969	1.23728212337454	1.49430372386898	5.3868629161121e-10
yZ9PwG	aGwo0E	outcome	TMEM86A	Weighted median	55	-0.418904	0.191271802652585	0.0285170790196822							0.657767253964734	0.452124876977897	0.956943053610073	0.0420420547540842
DzGd6S	aGwo0E	outcome	TMEM69	Weighted median	516	0.664309833248829	0.0467494099026279	7.94080787267403e-46							1.94314896163424	1.77301411800772	2.12960960025688	9.33158257216258e-45
wckG0w	aGwo0E	outcome	TMEM66	Weighted median	498	0.135210590262588	0.0619887987277631	0.029167884433704							1.14477783803416	1.01380699291244	1.29266843454034	0.0429400141450111
efWSCJ	aGwo0E	outcome	TMEM57	Weighted median	136	0.241555364400635	0.116488140150049	0.0381120413431282							1.27322794446822	1.01332662808479	1.59978959759372	0.0550159207352735
To3oww	aGwo0E	outcome	TMEM56	Weighted median	251	0.233745748376766	0.081619748569251	0.0041854183194963							1.26332324938443	1.07656028930388	1.48248607002513	0.0069449575534234
YzWdSS	aGwo0E	outcome	TMEM55B	Weighted median	44	0.0431379347360676	0.251817881658767	0.863983098249692							1.04408190008004	0.637357145012766	1.71035505384178	0.893092913664895
rJF4Ih	aGwo0E	outcome	TMEM52B	Weighted median	65	0.614099156666711	0.144935598300129	2.26477247709743e-05							1.8479910990319	1.39100343724474	2.45511334527367	4.78556692412508e-05
93224m	aGwo0E	outcome	TMEM50B	Weighted median	493	1.22273721494355	0.0387710594591499	2.67180970051715e-218							3.39647189507847	3.14793265822725	3.66463409053815	4.6314180573561e-216
N33Yk3	aGwo0E	outcome	TMEM5	Weighted median	814	-0.229761	0.0573145545932766	6.10344490877688e-05							0.794723381605974	0.710278807403663	0.889207514975588	0.0001238767876538
0R5PcF	aGwo0E	outcome	TMEM48	Weighted median	94	-0.430047	0.159591186170782	0.0070456183031016							0.650478368321022	0.475757998567711	0.889364149267916	0.0113460682257035
rcntFG	aGwo0E	outcome	TMEM44	Weighted median	480	0.245679882645901	0.0378054738139837	8.11103778047141e-11							1.2784902411148	1.18718048323293	1.37682291758588	2.54709890330936e-10
L9ThWd	aGwo0E	outcome	TMEM41A	Weighted median	91	-0.803784	0.145952015373542	3.64630906555794e-08							0.44763201826466	0.336267023437162	0.595878899237755	9.66720010549312e-08
xqS3mU	aGwo0E	outcome	TMEM40	Weighted median	89	-1.40303	0.176762325700104	2.06476772536567e-15							0.245850448310875	0.173863282741979	0.347643516108903	8.343343688552301e-15
OJpfxH	aGwo0E	outcome	TMEM39A	Weighted median	106	-0.22586	0.128066112901788	0.0777954822734501							0.797829522752298	0.620723270034891	1.02546815642884	0.106531313877408
Vo9USk	aGwo0E	outcome	TMEM38A	Weighted median	91	1.15988118709689	0.352431388418396	0.0009980222426473							3.18955429339739	1.59857988907836	6.36393380151614	0.0017849362072731
G3gc0j	aGwo0E	outcome	TMEM33	Weighted median	586	0.167003735352027	0.0617696515478102	0.0068581760888213							1.1817586795848	1.04700658191281	1.33385367475206	0.0110644136018562
SQuXHR	aGwo0E	outcome	TMEM30B	Weighted median	109	-0.104137	0.179725360811507	0.562304530417452							0.901102009144577	0.633561301657617	1.28161999282462	0.625566480874938
k7IAwF	aGwo0E	outcome	TMEM258	Weighted median	401	-0.255124	0.0240577195768061	2.8349702286007196e-26							0.774820486807938	0.739133269440485	0.812230772985967	1.8241622503144801e-25
6z8O1Q	aGwo0E	outcome	TMEM256	Weighted median	51	-0.0586467	0.162319219995647	0.717871699437554							0.943039892905943	0.686058509424614	1.29628045916654	0.767940227086603
n3H7nU	aGwo0E	outcome	TMEM246	Weighted median	16	0.384327751963985	0.496954205467945	0.439305489270095							1.46862670809761	0.554492226762149	3.88980098121886	0.505544120344992
afNBYj	aGwo0E	outcome	TMEM242	Weighted median	321	0.0267349872017123	0.0722498836844416	0.711356396793388							1.02709557322096	0.891477763467257	1.18334450926418	0.761943934062913
3MM0TM	aGwo0E	outcome	TMEM240	Weighted median	36	1.0104973913603	0.215808624026329	2.83566996654728e-06							2.74696699292526	1.7995065497092	4.19327601860646	6.49801026751405e-06
HFEHVY	aGwo0E	outcome	TMEM238	Weighted median	21	-0.147205	0.223382833588939	0.509907171303482							0.863116743436151	0.557085987640965	1.3372630605097	0.575214503902496
pUKdQG	aGwo0E	outcome	TMEM231	Weighted median	150	-0.201742	0.141928814266578	0.155191104063225							0.817305594295019	0.618831234524072	1.07943555075992	0.200410552959942
8lZ9fc	aGwo0E	outcome	TMEM229B	Weighted median	297	-0.179633	0.0460566985076156	9.60879646923162e-05							0.835576586178491	0.763452477563399	0.914514330476742	0.0001914821394737
oQeTsb	aGwo0E	outcome	TMEM221	Weighted median	23	0.700209059110252	0.191826651349038	0.0002620180288672							2.01417374482908	1.38296372408637	2.93347960159905	0.0004998253409578
vCL5Ry	aGwo0E	outcome	TMEM218	Weighted median	542	-0.177269	0.0363557593302207	1.0828909152257e-06							0.83755473492441	0.779949620433666	0.899414418080301	2.57115681669128e-06
BVwLhB	aGwo0E	outcome	TMEM217	Weighted median	114	-0.680238	0.112279881187434	1.3747183091445601e-09							0.506496537585171	0.406445122785043	0.631176826106098	4.00585163540574e-09
ME8AD8	aGwo0E	outcome	TMEM214	Weighted median	183	0.596188821937858	0.106701580803219	2.30439579823172e-08							1.81518759760553	1.47263560438047	2.23742112760276	6.19525825098181e-08
8OSYOq	aGwo0E	outcome	TMEM205	Weighted median	405	-0.0606743	0.0393409205975318	0.123008180370035							0.941129723591104	0.871288179710116	1.01656969215553	0.162004821582319
OpkgnB	aGwo0E	outcome	TMEM204	Weighted median	1632	0.0978903147276241	0.0102320348110988	1.1000719732061e-21							1.10284181296955	1.08094485726239	1.12518234048893	5.90919383410903e-21
agRUmO	aGwo0E	outcome	TMEM198	Weighted median	42	0.237326511489913	0.195162103039675	0.223966585980709							1.26785501943117	0.864856907605599	1.85863850558486	0.278937687427962
jLROf9	aGwo0E	outcome	TMEM192	Weighted median	37	-0.679376	0.397061080968475	0.0870791971860763							0.506933407623779	0.232790738119695	1.10391625474774	0.118199076233205
yaHoBd	aGwo0E	outcome	TMEM19	Weighted median	175	-0.541303	0.0674979355675649	1.06133219264301e-15							0.581989383707719	0.509870235323441	0.664309503247677	4.3487595847344e-15
2iAGsH	aGwo0E	outcome	TMEM183A	Weighted median	194	0.285357118309727	0.0665370638346068	1.79726634650202e-05							1.33023699529398	1.16759312658797	1.5155368966755	3.83295270089529e-05
a1thsY	aGwo0E	outcome	TMEM180	Weighted median	1844	0.500070096545036	0.0189585021085499	2.51026690135403e-153							1.64883684441554	1.58869262951104	1.71125797967536	2.0034687516574e-151
LVEu56	aGwo0E	outcome	TMEM18	Weighted median	534	-0.724813	0.0541567272035418	7.53763197234963e-41							0.48441490642004	0.435630583584314	0.538662367621671	7.7644210243951e-40
XjM3RV	aGwo0E	outcome	TMEM179B	Weighted median	212	-0.0813207	0.117960847170019	0.490579378059716							0.921897948431402	0.731598065258653	1.16169775137603	0.556243671577062
uW3uTK	aGwo0E	outcome	TMEM17	Weighted median	35	0.321993120708723	0.338141748256874	0.340973746175263							1.3798752833606	0.711226235875054	2.67714505116201	0.4048335972674
Zm77OR	aGwo0E	outcome	TMEM168	Weighted median	76	-1.56339	0.41005612162758	0.0001374957927123							0.209424428796825	0.0937519958942779	0.467815015120687	0.000269658779173
UIZUwC	aGwo0E	outcome	TMEM161B	Weighted median	37	-0.848631	0.250840235347515	0.0007165817636048							0.428000293762816	0.261772817980604	0.699783319269725	0.0013029550558472
NdP6GU	aGwo0E	outcome	TMEM161A	Weighted median	67	0.845746176407769	0.291149546708207	0.0036742746583685							2.32971554493935	1.3166532033116	4.12225064784014	0.0061421916877264
An1Vgo	aGwo0E	outcome	TMEM160	Weighted median	121	-0.0575376	0.141671176474181	0.684643406380334							0.944086369394304	0.715185642657173	1.2462485538225	0.737874696337347
1JBDyW	aGwo0E	outcome	TMEM155	Weighted median	150	0.0750936408419105	0.112277443472954	0.503608937136072							1.07798508958992	0.865048115825857	1.34333782377965	0.569097221312351
sq2YKX	aGwo0E	outcome	TMEM154	Weighted median	112	-0.558201	0.253832524727119	0.0278713048039142							0.572237394999984	0.347944221206695	0.941115317566501	0.0411550967279724
TgmjNA	aGwo0E	outcome	TMEM14E	Weighted median	173	-0.792781	0.0870831436070039	8.72824288439296e-20							0.452584254561737	0.381568726372046	0.536816812595597	4.31028971629014e-19
IpO4cv	aGwo0E	outcome	TMEM14A	Weighted median	330	-0.377284	0.0673493661409167	2.12029412050153e-08							0.685721566473161	0.60092306093037	0.782486306979806	5.71399140492784e-08
H1hpOC	aGwo0E	outcome	TMEM141	Weighted median	184	-0.378032	0.0402091318060557	5.3718486628505005e-21							0.685208688120753	0.6332805606439	0.741394850015259	2.7958853717952304e-20
odrhKc	aGwo0E	outcome	TMEM138	Weighted median	77	-1.02449	0.215954289956159	2.09530691190273e-06							0.358979909835882	0.235096488008943	0.548143346407097	4.85572977618588e-06
A6nZNO	aGwo0E	outcome	TMEM134	Weighted median	129	0.669556561656865	0.23255313653836	0.0039874211078143							1.95337092898622	1.23831602717638	3.08132811210478	0.0066342425820682
eQE7P6	aGwo0E	outcome	TMEM132E	Weighted median	3	-1.39864	0.794394294325246	0.0782995638230114							0.246932221754093	0.0520446017153479	1.17160128295171	0.107156246753324
oXjiuS	aGwo0E	outcome	TMEM132C	Weighted median	26	-0.505071	0.260044601054704	0.0521070918676355							0.603462673097085	0.362489957277348	1.00462699865323	0.07357513031716
ntM0ea	aGwo0E	outcome	TMEM129	Weighted median	299	-0.168308	0.0534341667514727	0.001633667175093							0.845093147120393	0.761062807819699	0.93840143017348	0.0028497602291981
rNXo3Y	aGwo0E	outcome	TMEM128	Weighted median	134	-0.755814	0.0740004569703973	1.72280630231289e-24							0.469628220301934	0.406222266966879	0.5429310090526	1.0345423575199201e-23
WJT7bj	aGwo0E	outcome	TMEM127	Weighted median	795	-0.0665585	0.019443415196358	0.000618906987295							0.935608168854036	0.900623833936957	0.971951454804245	0.0011335308776353
mC5a7l	aGwo0E	outcome	TMEM123	Weighted median	118	-0.181233	0.187175800418333	0.332920717217334							0.834241355493166	0.578048737902352	1.20397916919705	0.396511142543104
iugz2R	aGwo0E	outcome	TMEM120B	Weighted median	141	-0.847565	0.10759246183683	3.33857522311552e-15							0.428456868757344	0.346994472848393	0.529043840031292	1.33443067756938e-14
GjYllW	aGwo0E	outcome	TMEM120A	Weighted median	810	0.0239393700416959	0.0445918640875828	0.591367701761661							1.02422821709396	0.938511017478061	1.11777424148992	0.652614938062924
F6q8yQ	aGwo0E	outcome	TMEM119	Weighted median	703	0.20057727558479	0.0441451545675358	5.53054091532668e-06							1.22210804770528	1.12081127148472	1.33255983256444	1.23558681698496e-05
LJaD0N	aGwo0E	outcome	TMEM115	Weighted median	30	-2.2721	0.405203219914276	2.05489491314758e-08							0.103095237153812	0.0465932128043962	0.228115368828955	5.54288689021184e-08
Mf3ICf	aGwo0E	outcome	TMEM11	Weighted median	16	1.67284686407257	0.605296242852884	0.0057153054805711							5.32731236386339	1.62655816654995	17.4480431169384	0.0093278241379801
AIZwE3	aGwo0E	outcome	TMEM108	Weighted median	6	0.443474893609747	0.889931252507142	0.618255067207026							1.55811209615153	0.272316479549552	8.91504365872193	0.677408128040735
YYSD82	aGwo0E	outcome	TMEM106C	Weighted median	1411	0.0082016318593269	0.0262449243836003	0.754657870766218							1.00823535738029	0.957683032121666	1.06145614130774	0.800858436394292
ppMWDu	aGwo0E	outcome	TMEM104	Weighted median	58	0.308328452306908	0.198229079856761	0.11984730230108							1.36114798772085	0.922931239307745	2.00743431966414	0.15823021127182
tMkwdo	aGwo0E	outcome	TMEM101	Weighted median	301	0.178807587000208	0.0694721118491573	0.0100587289149313							1.19579063636726	1.04356449054396	1.3702222133663	0.0158591748447166
wYMO6h	aGwo0E	outcome	TMED9	Weighted median	522	-0.0265537	0.0145432812595334	0.0678743856121646							0.973795746896131	0.94642974797065	1.00195303318213	0.0939639710922425
W5Itkq	aGwo0E	outcome	TMED5	Weighted median	1869	-0.0415904	0.0094972275780995	1.19106626606373e-05							0.959262596808763	0.941571506651691	0.977286083038502	2.58156592836812e-05
SVDWYd	aGwo0E	outcome	TMCC3	Weighted median	417	-0.250112	0.0384946793407509	8.17729240760141e-11							0.778713891532262	0.722122022109651	0.839741	2.56692576447282e-10
qMRoSj	aGwo0E	outcome	TMC8	Weighted median	449	-0.00950655	0.0427126240724678	0.823870176102205							0.990538495033414	0.910990060301892	1.07703316742876	0.860009261309131
b51f8Q	aGwo0E	outcome	TMC5	Weighted median	116	1.53350776042091	0.215732820916066	1.17425177875619e-12							4.63440472533227	3.03639644214576	7.07341994611355	4.10614104090403e-12
Ar8qZd	aGwo0E	outcome	TMC2	Weighted median	149	1.80363688461835	0.144083027329764	5.9487102335472196e-36							6.07168939190063	4.57787149515365	8.05295913411859	5.32013272389452e-35
ynw4XR	aGwo0E	outcome	TMBIM4	Weighted median	382	0.333391521473114	0.0282000457009212	2.99106275273648e-32							1.39569363553968	1.32064391480171	1.47500829137463	2.36427957077505e-31
mVmi6P	aGwo0E	outcome	TMA16	Weighted median	9	-1.28867	0.466665251736687	0.0057546521827635							0.275637248266517	0.110434412197979	0.687972988851817	0.0093870792374386
8hZz8O	aGwo0E	outcome	TM9SF3	Weighted median	83	1.00954439812158	0.211806881282378	1.87599117871257e-06							2.74435039895022	1.81194872690087	4.15655200415075	4.36694115826873e-06
5EsyVv	aGwo0E	outcome	TM4SF19-AS1	Weighted median	444	-0.0143439	0.0173200382809334	0.407574526064399							0.985758456928336	0.952856272915762	1.01979675531993	0.47356944889622
4v7V7Q	aGwo0E	outcome	TM4SF19	Weighted median	509	-0.0249884	0.0283210207332294	0.377600790494856							0.975321264869737	0.922657154435502	1.03099137651959	0.442776384439424
5rtZHx	aGwo0E	outcome	TM2D3	Weighted median	336	0.514958232551784	0.043395066820359	1.7618822539268901e-32							1.6735685996479	1.53710980263309	1.82214169275974	1.40617558951131e-31
IE6Mzu	aGwo0E	outcome	TLR6	Weighted median	548	0.262936959714998	0.0461038483331811	1.17616433840469e-08							1.30074471704936	1.18835906314831	1.42375892219763	3.22202765943258e-08
z2DeMp	aGwo0E	outcome	TLR5	Weighted median	802	-0.073947	0.0281106065085691	0.0085240850190117							0.928720890521749	0.878935454285951	0.981326317291667	0.013588311838735
ZzIwJw	aGwo0E	outcome	TLR3	Weighted median	281	-0.322002	0.0632125892830331	3.5066073746473e-07							0.724696449039843	0.640248384091215	0.820283121833127	8.64844112274477e-07
coTyyD	aGwo0E	outcome	TLR10	Weighted median	572	-0.0216649	0.0561332349398811	0.699529479790183							0.978568057344497	0.876616137196305	1.09237715600089	0.751442811264936
odSTit	aGwo0E	outcome	TLR1	Weighted median	285	0.150721308200593	0.123646010392332	0.222853949393642							1.16267258561074	0.912447369756201	1.48151837151107	0.277705982138835
EuV9Q6	aGwo0E	outcome	TLN1	Weighted median	9	-0.750002	0.455078706721199	0.0993379293435782							0.47236541755428	0.193600858767535	1.15252116711502	0.133380217518095
0jNuAh	aGwo0E	outcome	TLK1	Weighted median	360	0.439596761218841	0.0916418655312652	1.61140904114088e-06							1.55208123296435	1.29690246854516	1.85746901725191	3.77148194331451e-06
Txvnmz	aGwo0E	outcome	TLE6	Weighted median	26	-0.05432	0.221640212446758	0.806392884184874							0.947128936481549	0.61340194350577	1.46242318241405	0.845247977115024
zy9Aay	aGwo0E	outcome	TLE4	Weighted median	296	0.313387091823848	0.0624243825483332	5.15996024179037e-07							1.36805098989919	1.21050218451039	1.54610502559411	1.2563702110654e-06
Xuq55E	aGwo0E	outcome	TLE2	Weighted median	148	-0.297414	0.0911393114366903	0.0011012582035792							0.742736288302007	0.621234112124539	0.888002096462552	0.0019610517619372
8tlS2p	aGwo0E	outcome	TK1	Weighted median	25	1.50217697548345	0.689110579422254	0.0292665078441852							4.4914562251395	1.16360185265854	17.3368398960982	0.0430787857767864
BlkU0Q	aGwo0E	outcome	TIPRL	Weighted median	366	0.134483585466294	0.0405625342793372	0.0009149142047328							1.14394588151005	1.05652055990644	1.23860550327549	0.0016439173106535
oH7m9g	aGwo0E	outcome	TINF2	Weighted median	16	0.254117455443011	0.43162304868386	0.556029946527919							1.28932323340611	0.553295136016807	3.00446234204791	0.619381002216884
1C9H3v	aGwo0E	outcome	TINCR	Weighted median	141	-0.352062	0.133050981636402	0.0081433520370619							0.703236588104773	0.54180895181534	0.91276029528909	0.0130175059274218
XgDljl	aGwo0E	outcome	TIMMDC1	Weighted median	180	-0.237922	0.156219653187784	0.127759378348213							0.788264085313944	0.58035654481656	1.07065264232047	0.167627986310168
l2Tkue	aGwo0E	outcome	TIMM9	Weighted median	43	-0.305066	0.339783084643636	0.369279217139772							0.737075082074716	0.378688859363573	1.43463337561207	0.434229532663153
1vVOHZ	aGwo0E	outcome	TIMM23	Weighted median	9	-0.885354	0.435722236465852	0.0421613784824679							0.4125679543294	0.17563102516733	0.969147203789181	0.0604492144170811
jgoVzZ	aGwo0E	outcome	TIMM21	Weighted median	465	0.129167866362509	0.0467111713987718	0.0056879933305978							1.13788112009899	1.03833032928319	1.24697642644376	0.0092860095341041
xkA6JD	aGwo0E	outcome	TIMM17A	Weighted median	45	0.933877468700362	0.213185387724319	1.18359179971985e-05							2.54435573514744	1.67537012122157	3.8640692137075	2.56618035993854e-05
DkT3LW	aGwo0E	outcome	TIMELESS	Weighted median	40	-0.69862	0.202530145804899	0.0005617039263208							0.497271002377848	0.334345894081514	0.739588713913091	0.0010329756950576
PIPG3s	aGwo0E	outcome	TIGD6	Weighted median	167	0.656992459329819	0.0806130842594973	3.6408025242490497e-16							1.92898210939158	1.64705824386728	2.25916235337006	1.52843785779636e-15
G2GHDy	aGwo0E	outcome	TIGD3	Weighted median	329	0.503007131273102	0.0905244288098698	2.75095986776081e-08							1.65368665403187	1.3848325790854	1.97473657900885	7.35977853065024e-08
AHfvHE	aGwo0E	outcome	TIGD2	Weighted median	434	-0.0825285	0.0421485346900062	0.050225484386021							0.920785234198785	0.847775358651309	1.00008267386695	0.0710726857562613
0MbiBZ	aGwo0E	outcome	TIE1	Weighted median	101	-0.573911	0.148909923748519	0.0001161661222947							0.563318214478791	0.420725764264189	0.754238123064676	0.00022951229513
pcG8qW	aGwo0E	outcome	TICAM1	Weighted median	240	0.223645078485108	0.0453989427803956	8.38365607633588e-07							1.25062706619585	1.14415131278947	1.36701154927524	2.00862153801756e-06
mODZa9	aGwo0E	outcome	TIAM1	Weighted median	635	-0.00226292	0.0233979725237343	0.922953308551556							0.997739640677809	0.953016612260403	1.04456142502989	0.940941644721655
eCDmv5	aGwo0E	outcome	TIAL1	Weighted median	157	-0.484188	0.18766420000452	0.0098778214187431							0.616197263204726	0.426556705154959	0.890149099972672	0.0155988368351287
OkFfAJ	aGwo0E	outcome	THYN1	Weighted median	248	0.183710530107431	0.0696581001081153	0.0083564563927683							1.20166792606041	1.04831137350778	1.37745887435191	0.013335724235938
Rte5V4	aGwo0E	outcome	THUMPD3	Weighted median	486	-0.0596304	0.0307166825006118	0.0522216099929404							0.942112703192881	0.887066731399686	1.00057449355237	0.0737220802537858
bOg5Ff	aGwo0E	outcome	THUMPD2	Weighted median	317	0.0105732361365154	0.0272932557738168	0.69846474546044							1.01062933032242	0.957986545780681	1.06616491411747	0.750511208212413
zckUoz	aGwo0E	outcome	THRB	Weighted median	45	1.05995998585698	0.269300294158372	8.28586244719343e-05							2.88625549591707	1.70255729054014	4.89291657555244	0.0001662320659811
pLhTPb	aGwo0E	outcome	THRAP3	Weighted median	41	0.314671141487102	0.333662089912767	0.345638302133427							1.36980876360494	0.712264067690525	2.63438257517739	0.409542933277522
xkEceM	aGwo0E	outcome	THRA	Weighted median	361	0.248356096271904	0.0686391397445079	0.0002965596065814							1.28191633655559	1.12055419778225	1.46651495945531	0.0005622000861067
PRi28y	aGwo0E	outcome	THOC7	Weighted median	233	-0.489659	0.0956196365727023	3.04073974521768e-07							0.612835331669486	0.508101781706971	0.739157305216937	7.53481795821784e-07
OpjWkm	aGwo0E	outcome	THOC3	Weighted median	80	-0.136525	0.0899514404114886	0.129072918577633							0.872384153292448	0.731374065559443	1.04058121111204	0.16923457088805
87V4Si	aGwo0E	outcome	THOC1	Weighted median	116	0.370887463076378	0.11245653090177	0.0009735817532485							1.44901999595809	1.16238352801944	1.80633921427288	0.0017430549886111
69XHjM	aGwo0E	outcome	THEMIS2	Weighted median	444	0.0912245520637598	0.0358910501614044	0.011031244017111							1.09551497778975	1.0210975658721	1.17535591766558	0.0172969990217201
DZdIlF	aGwo0E	outcome	THEM5	Weighted median	32	0.989522710239986	0.197947137905795	5.76511006747615e-07							2.68995028018408	1.82493855859535	3.96497321829388	1.39916355209041e-06
9w15dV	aGwo0E	outcome	THEM4	Weighted median	1571	0.0236112326125899	0.0104519975102075	0.0238823717422819							1.02389218461542	1.00313020638909	1.04508387748609	0.0356604246866938
lCIGEJ	aGwo0E	outcome	THBS4	Weighted median	41	0.128970796084738	0.241509810193968	0.593328478273656							1.1376568996449	0.708653610916696	1.82636933104089	0.654377970535193
ZShaZo	aGwo0E	outcome	THAP8	Weighted median	306	-0.103374	0.0545449978708917	0.0580639564367308							0.901789204016819	0.81035514200356	1.00353996208457	0.0813283898909532
B9GaR9	aGwo0E	outcome	THAP7-AS1	Weighted median	271	0.028851612968543	0.0175625110838594	0.100425265826479							1.02927185254819	0.994444579980901	1.06531884005877	0.134697401993471
WZmkcs	aGwo0E	outcome	THAP5	Weighted median	507	-0.181306	0.0480941506475451	0.0001633685450857							0.83418001507643	0.759138842767499	0.916639036695997	0.0003179646311654
3eTtyM	aGwo0E	outcome	THAP2	Weighted median	64	1.77506832386987	0.334217352541055	1.08953809023995e-07							5.90068428013158	3.06486	11.3604080762206	2.79067037910224e-07
YVieP5	aGwo0E	outcome	TGM1	Weighted median	318	0.231155705591765	0.0543439405462797	2.10389986870868e-05							1.2600554218506	1.13274238517709	1.40167763377802	4.46051691759569e-05
vE8pSU	aGwo0E	outcome	TGIF2	Weighted median	14	-0.613083	0.645374807956062	0.342130795525227							0.541678560052168	0.152892970789756	1.91909190399386	0.405963436803958
KJMxAJ	aGwo0E	outcome	TGIF1	Weighted median	223	-0.0974776	0.0764397882157551	0.202230980769778							0.907122630135267	0.780906684159836	1.05373853597993	0.254516824556803
l0zsSj	aGwo0E	outcome	TGFBR2	Weighted median	203	0.135352683581401	0.0522937754778076	0.0096447166162437							1.14494051487384	1.03340263183955	1.26851697703351	0.0152570584371531
GK9nXg	aGwo0E	outcome	TGFB3	Weighted median	417	-0.56262	0.0596245484011377	3.87092189876913e-21							0.569714280605064	0.506878260900814	0.640339873618802	2.02815945025868e-20
i9Pf4Q	aGwo0E	outcome	TGFB2	Weighted median	73	-1.77931	0.25477594340028	2.87228280749431e-12							0.168753992863253	0.102419911487202	0.278050524490536	9.81459313450281e-12
7n8OFT	aGwo0E	outcome	TGFB1	Weighted median	25	-0.452989	0.302822356968566	0.134682426893078							0.635725244520909	0.351157431208051	1.15089857312951	0.175879990901608
i6k5WQ	aGwo0E	outcome	TGFA	Weighted median	336	0.109232973694228	0.0760999465169209	0.151176475047832							1.11542218409991	0.960863498235492	1.29484224457165	0.195660878593383
VTU8lP	aGwo0E	outcome	TGDS	Weighted median	140	0.222743669883002	0.0715739637084947	0.0018577618044967							1.24950024813839	1.08595382372156	1.43767703192711	0.0032181705679565
QrSt3C	aGwo0E	outcome	TFP1	Weighted median	25	-0.807357	0.185237003763045	1.30953588651174e-05							0.44603559838801	0.310236291716748	0.641278149401662	2.82757873257603e-05
JmBsAL	aGwo0E	outcome	TFEB	Weighted median	32	-1.50006	0.371967316154867	5.51251016571486e-05							0.22311774150571	0.107624001086048	0.462550416935415	0.0001123863237523
hoIy2u	aGwo0E	outcome	TFDP1	Weighted median	11	0.745857639249339	0.84968224569602	0.380048071425249							2.10824877674464	0.39871055065062	11.1477183069079	0.445382
xZkko0	aGwo0E	outcome	TFCP2	Weighted median	1490	-0.22104	0.0202479086017498	9.59157168374514e-28							0.801684305069838	0.770491786649559	0.834139618528635	6.47162545605109e-27
TtC0Vb	aGwo0E	outcome	TFAP2E	Weighted median	9	-2.15114	1.28051961407258	0.0929769181386763							0.116350981910842	0.0094573563217174	1.43143078584553	0.125501057016531
H6qHRe	aGwo0E	outcome	TEX264	Weighted median	927	-0.046474	0.0582341730773962	0.424838878881986							0.954589339118748	0.851621566493213	1.07000672858891	0.490908806974944
6iHITA	aGwo0E	outcome	TEX14	Weighted median	666	0.417137992862378	0.0365224554862624	3.2688138428374194e-30							1.5176119180991	1.4127723507033	1.63023146143106	2.41064651855048e-29
DdS1uD	aGwo0E	outcome	TEX10	Weighted median	456	-0.0130781	0.0923631462026799	0.887400277375785							0.987007029489119	0.823567402370439	1.18288178169387	0.912160041263283
mAgkGn	aGwo0E	outcome	TET3	Weighted median	39	0.0773670187280753	0.178260529820132	0.664280502395705							1.08043854481296	0.761836266518494	1.5322812793518	0.71958623119447
RYLH04	aGwo0E	outcome	TET2	Weighted median	198	2.20939627496298	0.133886379234187	3.5479687277365e-61							9.11021466775525	7.00748575802172	11.8439072384235	6.08612149501272e-60
0EqTQB	aGwo0E	outcome	TET1	Weighted median	5	1.71268969774247	1.25877383772973	0.173639625674784							5.54385273033542	0.470242375707252	65.3584293619276	0.221897059603491
cO7ZU0	aGwo0E	outcome	TESK1	Weighted median	75	-0.772709	0.248311623365302	0.001859181777036							0.461760543772447	0.28382438136055	0.751249060291839	0.0032201787094944
hXtiYR	aGwo0E	outcome	TERT	Weighted median	5	-0.164972	1.15245547890723	0.886172919676794							0.847917235894452	0.0885856865485602	8.1160249125887	0.911201761551883
WAs7IK	aGwo0E	outcome	TERF1	Weighted median	76	-2.14563	0.140218698592456	7.40932043556387e-53							0.116994000494342	0.0888806098152629	0.153999800182735	1.03900839477196e-51
TJHdDx	aGwo0E	outcome	TENM4	Weighted median	973	-0.0979152	0.0146347896147313	2.22288851850383e-11							0.906725772214071	0.881086557971853	0.933111075817216	7.217703679240529e-11
riWXxm	aGwo0E	outcome	TENC1	Weighted median	157	-0.562908	0.118771288541361	2.14320121024434e-06							0.569550273528428	0.451265261718645	0.718839985246984	4.96299659649861e-06
H2q3Mp	aGwo0E	outcome	TEN1-CDK3	Weighted median	398	-0.126553	0.0443483375092849	0.0043225771546782							0.881127633105335	0.807771924418953	0.961144949894465	0.0071605230584638
q90WPM	aGwo0E	outcome	TEDDM1	Weighted median	166	0.190140896652864	0.0904503823861411	0.0355395327189186							1.20941998888153	1.01294116860273	1.4440095386032	0.0515808200861581
9iENKO	aGwo0E	outcome	TECTA	Weighted median	78	-0.0433601	0.171856155309256	0.8008054742144							0.957566475914042	0.683725882542121	1.34108358218829	0.840764910054489
l7eden	aGwo0E	outcome	TECR	Weighted median	23	0.0554680284548752	0.132385242694316	0.675223796105529							1.0570352214829	0.81545662445993	1.37018135108705	0.729594198098468
u5EWFr	aGwo0E	outcome	TEC	Weighted median	376	-0.883905	0.0821436135414796	5.28923138023497e-27							0.413166366530292	0.351724730428563	0.48534103992018	3.47386197657203e-26
2pECKt	aGwo0E	outcome	TEAD3	Weighted median	23	-0.231843	0.514851720972928	0.652487276758126							0.793070918699261	0.289108854228204	2.17551788154516	0.708894021236842
63UbzW	aGwo0E	outcome	TEAD2	Weighted median	606	-0.217133	0.0177275310857264	1.7146792922260099e-34							0.804823046536747	0.777338942247307	0.833278896801512	1.46253972848484e-33
uIpRTo	aGwo0E	outcome	TDRD7	Weighted median	504	0.009713030922181	0.0403022293316799	0.809551392406235							1.00976035550464	0.933066002350362	1.09275868264461	0.847982941206116
YbuQLk	aGwo0E	outcome	TDRD6	Weighted median	145	-0.389614	0.130299083960723	0.0027884062825543							0.677318414682589	0.524662547707627	0.874391047869848	0.0047314317560375
VAxWQf	aGwo0E	outcome	TDRD3	Weighted median	222	0.939926103185341	0.118597518035666	2.2751599243362103e-15							2.55979225084639	2.02886184399006	3.22966119497161	9.175487815672e-15
l3mHXl	aGwo0E	outcome	TDRD1	Weighted median	5	0.0560244888153603	1.59035622288138	0.971898226221035							1.05762358336814	0.0468373785425666	23.881943842777	0.978533628230166
zarNy5	aGwo0E	outcome	TCTEX1D4	Weighted median	14	0.491579745984972	0.527442796524006	0.35133352756481							1.63489690282506	0.581462885098609	4.5968331794964	0.415565644223533
5ks2He	aGwo0E	outcome	TCP11L1	Weighted median	1294	-0.0727384	0.0171385461366754	2.19432009232018e-05							0.929844033927351	0.899127920374705	0.961609474956543	4.64225743066521e-05
9lr0mY	aGwo0E	outcome	TCP1	Weighted median	1095	-0.0136957	0.01181567850083	0.24641165409697							0.986397696595003	0.963816464366248	1.00950798395803	0.303532512525623
4MJyOA	aGwo0E	outcome	TCOF1	Weighted median	5	-2.98159	1.23542973935406	0.0158042500920859							0.0507120243249879	0.0045028960638434	0.571123422498694	0.0242402163085787
UzFMSD	aGwo0E	outcome	TCN2	Weighted median	1258	-0.0852943	0.0184613741872863	3.83465845327428e-06							0.918242018283659	0.885610022876843	0.952076401984108	8.69286612981734e-06
eeYNUn	aGwo0E	outcome	TCL1B	Weighted median	458	-0.113908	0.0535906091930719	0.0335430177049142							0.892339994649021	0.803365377366506	0.99116876141769	0.0488813221933239
3iJyFU	aGwo0E	outcome	TCF7	Weighted median	268	1.07506150744211	0.152987686821068	2.10853127209351e-12							2.93017312244486	2.17103853640976	3.95474994271487	7.26211450329305e-12
Sy4ySc	aGwo0E	outcome	TCF3	Weighted median	57	-1.0813	0.167065141252755	9.649092582087249e-11							0.33915301511187	0.244448267264877	0.47054850887871	3.0166695407724103e-10
KLIjyD	aGwo0E	outcome	TCERG1	Weighted median	191	0.260797523171279	0.102723023098786	0.0111220045943946							1.29796483102287	1.0612637318724	1.58745903772654	0.0174304600760358
SJuHA4	aGwo0E	outcome	TCEB3	Weighted median	974	-0.0836787	0.0117167415300666	9.211398508860449e-13							0.919726744624027	0.898846069625639	0.941092488871891	3.23824607224957e-12
iB7A2i	aGwo0E	outcome	TCEA1	Weighted median	101	-0.908356	0.0866734209657074	1.0650135686665401e-25							0.403186483477856	0.340195103883739	0.477841505075845	6.70338454998513e-25
2THU50	aGwo0E	outcome	TCAIM	Weighted median	314	-0.209916	0.0736017928272459	0.004343844214892							0.810652419681915	0.701751860113359	0.936452587998825	0.0071943053990517
cX5TC6	aGwo0E	outcome	TBXAS1	Weighted median	710	0.270985276524326	0.0383912170706616	1.6828203110265899e-12							1.31125576400012	1.21620881427355	1.41373065089199	5.83535985299688e-12
8NB4dT	aGwo0E	outcome	TBXA2R	Weighted median	108	-0.195012	0.0823243581566627	0.0178444776382442							0.822824481312856	0.700214816732043	0.966903457152721	0.0271586792594633
pJeOw4	aGwo0E	outcome	TBX19	Weighted median	181	0.080972191591334	0.0367696148229079	0.0276547447192832							1.08434	1.00894350279526	1.16537233480151	0.0408594373720999
UZksCe	aGwo0E	outcome	TBRG1	Weighted median	65	-0.261975	0.537472460454468	0.625960882978171							0.76953048841338	0.268361392356897	2.20664070713343	0.684606174354576
NUGIPB	aGwo0E	outcome	TBPL1	Weighted median	81	-0.179456	0.0551565934268639	0.0011396216832836							0.835724573262714	0.750089233809143	0.9311366313156	0.0020246963001856
zj4Pw4	aGwo0E	outcome	TBL3	Weighted median	57	-1.49541	0.198459826161311	4.8814014854917e-14							0.224157776406219	0.151922254066952	0.330739620946096	1.83517103026499e-13
o2Oe2Q	aGwo0E	outcome	TBL1XR1	Weighted median	38	0.810992595776201	0.23649088306313	0.0006051929455802							2.25014035838741	1.41548250368258	3.57696518273548	0.0011096476800215
B0AELU	aGwo0E	outcome	TBK1	Weighted median	428	-0.296138	0.0387017334859653	1.9816934246645e-14							0.743684550528806	0.68935856967232	0.802291775321117	7.62770551294899e-14
gJv47b	aGwo0E	outcome	TBCEL	Weighted median	4	0.814972960112369	0.828467400714566	0.325257353755389							2.25911458531928	0.445381907716472	11.4589268696815	0.388460994743805
8KMrrO	aGwo0E	outcome	TBCC	Weighted median	48	-0.855177	0.257820565071687	0.0009100716052985							0.425207953778859	0.256531135888453	0.704794774055895	0.0016354540582941
WQltXz	aGwo0E	outcome	TBCB	Weighted median	233	0.695364225594413	0.0888853008508381	5.15122018529911e-15							2.00443900899211	1.68396147070035	2.38591	2.04062008511212e-14
bJrHlc	aGwo0E	outcome	TBCA	Weighted median	431	0.0673678817353965	0.0182700356318762	0.0002266081230287							1.06968892481724	1.03206186492657	1.10868779746849	0.0004345932104808
ra7wTS	aGwo0E	outcome	TBC1D9B	Weighted median	1086	0.191127851237575	0.0258394850162072	1.3957255331878e-13							1.21061422071375	1.1508288945462	1.27350538237248	5.13693127587552e-13
z5YHvr	aGwo0E	outcome	TBC1D5	Weighted median	302	0.392994313391758	0.0880635524061039	8.0962945580562e-06							1.48140996510719	1.24656248449053	1.76050178953992	1.78236816564168e-05
mj2S51	aGwo0E	outcome	TBC1D27	Weighted median	104	0.390560750266054	0.106443989712044	0.0002433423003406							1.47780924351074	1.1995308600928	1.82064524795703	0.0004654215897688
BmRECF	aGwo0E	outcome	TBC1D24	Weighted median	3	0.264236970859997	1.24207212063077	0.831530677277129							1.30243679930291	0.114151999974607	14.8603757845309	0.866321728621903
b4CSIe	aGwo0E	outcome	TBC1D22B	Weighted median	156	0.469963762709596	0.121598610584597	0.0001111448603642							1.59993621481363	1.26065381347361	2.03053039947493	0.0002199699357653
uJ4ttW	aGwo0E	outcome	TBC1D20	Weighted median	136	0.327925655410861	0.0881402788258895	0.0001988309927372							1.38808577178687	1.16785730774003	1.64984377549149	0.0003837799388239
apumUZ	aGwo0E	outcome	TBC1D19	Weighted median	7	-0.434785	0.615662885528972	0.480059633824974							0.647403697914646	0.193692296195417	2.16390407004465	0.54565585518717
HRq8p6	aGwo0E	outcome	TBC1D16	Weighted median	333	0.146224977878317	0.045671748118312	0.0013664264722002							1.15745656088195	1.05834710010633	1.26584717829724	0.0024053293071836
tdyR70	aGwo0E	outcome	TAX1BP1	Weighted median	565	0.605238150451942	0.0594657402311874	2.48797045059234e-24							1.83168837436138	1.63017162322613	2.05811600016131	1.48517646412051e-23
NpKfSD	aGwo0E	outcome	TATDN2	Weighted median	923	-0.00485553	0.032831447435987	0.882427491792305							0.995156239384981	0.933135212242194	1.06129950707488	0.90835258010575
Qo1saa	aGwo0E	outcome	TATDN1	Weighted median	66	-0.758088	0.166978635829447	5.62456560138063e-06							0.468561286286303	0.337777968175787	0.649982235940315	1.25596824446306e-05
EAzcUt	aGwo0E	outcome	TAS2R60	Weighted median	211	0.0445806640042633	0.0598258932842303	0.456166904194592							1.04558931472983	0.929900128944739	1.17567143077809	0.522280138525908
Bth60L	aGwo0E	outcome	TARM1	Weighted median	41	-0.590885	0.179678061586731	0.0010069493292623							0.553836759802882	0.389436563371736	0.787638309698623	0.0017999347611067
VyrmVL	aGwo0E	outcome	TARDBP	Weighted median	54	-0.614036	0.262284486010889	0.0192266291830055							0.541162225593756	0.323643144773729	0.904874888094213	0.0291196284842583
vKaSow	aGwo0E	outcome	TARBP2	Weighted median	128	0.690313936533891	0.149639934302403	3.96580305337268e-06							1.9943415316439	1.48738517964123	2.67408751901044	8.97739040715591e-06
akR6w2	aGwo0E	outcome	TARBP1	Weighted median	421	0.0209718103915796	0.0488261064726806	0.667544527263077							1.02119326419354	0.927996462378928	1.12374963171835	0.722345904728459
jWk8o6	aGwo0E	outcome	TANK	Weighted median	1466	0.468360837148094	0.0265573683251621	1.3079637181271e-69							1.59737369047469	1.51635343293649	1.68272294017855	2.7150139313711302e-68
x97Jr4	aGwo0E	outcome	TALDO1	Weighted median	183	0.482320295243971	0.105874270946909	5.223750940213e-06							1.61982852559526	1.31627624592072	1.99338433741678	1.16963817847781e-05
ehCohO	aGwo0E	outcome	TAGLN2	Weighted median	137	-0.246745	0.0564277990698212	1.22689574574043e-05							0.78134004973968	0.699532302111787	0.872714914642565	2.65552379087907e-05
D2KlxG	aGwo0E	outcome	TAF8	Weighted median	3	0.533304222077363	1.34538561663439	0.691813604417965							1.70455524285648	0.122010083438866	23.8136758377461	0.744465518723142
3v8Sp8	aGwo0E	outcome	TAF6L	Weighted median	89	0.286899191017784	0.240512547533888	0.232921937444262							1.33228989991696	0.831515447917229	2.13465231688326	0.288853138428066
8QXpZF	aGwo0E	outcome	TAF4	Weighted median	128	-0.209263	0.0679792738239563	0.0020816476835609							0.811182200505427	0.709991724066815	0.926794693672942	0.0035847615905939
9enJpy	aGwo0E	outcome	TAF15	Weighted median	95	0.317899391319404	0.107671391180385	0.0031521577906822							1.37423799400083	1.11278230993537	1.6971244485951	0.0053128876985798
PihNPa	aGwo0E	outcome	TAF10	Weighted median	60	0.139805249814231	0.200141505129164	0.484844540518252							1.15004980463338	0.776877887244391	1.70247419170165	0.550461263293408
zIqeul	aGwo0E	outcome	TADA2B	Weighted median	487	0.170231245700565	0.0284139619890327	2.08410273232776e-09							1.18557897966537	1.12135736013036	1.25347865631433	6.003202570415051e-09
orwsjv	aGwo0E	outcome	TACR2	Weighted median	214	1.01352173613331	0.086355881173512	8.27771302507519e-32							2.75528734365461	2.32626553953892	3.26343154599967	6.44920133382415e-31
vAcZDv	aGwo0E	outcome	TAB1	Weighted median	112	-2.86197	0.163835034600762	2.48446559523197e-68							0.0571559726917768	0.0414574344930138	0.0787990201104614	5.00775413305774e-67
A0ZDXw	aGwo0E	outcome	T	Weighted median	81	-0.640821	0.143093527336338	7.52279793709364e-06							0.526859931597098	0.398007725217172	0.697427135041255	1.66100016306698e-05
t8JFUG	aGwo0E	outcome	SYVN1	Weighted median	18	-0.791252	0.49009359430398	0.106421000269597							0.453277108074441	0.173455348900991	1.18451312113531	0.142079685339934
hFbPNK	aGwo0E	outcome	SYT5	Weighted median	64	0.963905130693848	0.199762080382226	1.39816689239155e-06							2.62191542967773	1.77246539000756	3.87846248459207	3.29047441810307e-06
P6kMFg	aGwo0E	outcome	SYT2	Weighted median	11	-3.15924	1.22449961972438	0.0098793853356443							0.0424581380387409	0.0038516412205986	0.468032556115548	0.0156008078547815
2T1DJ0	aGwo0E	outcome	SYNM	Weighted median	929	-0.0519707	0.0119726338550212	1.4197045485743e-05							0.949356676829541	0.927338087549168	0.971898072495641	3.05624052521749e-05
lpn9GY	aGwo0E	outcome	SYNE1	Weighted median	244	-0.344856	0.0928827670873478	0.0002049741558043							0.708322572852401	0.590428992026536	0.849756488905097	0.0003950200202537
z2rkCX	aGwo0E	outcome	SYNC	Weighted median	32	0.790227517931336	0.343828281107765	0.021543565947681							2.20389779548583	1.1233598794335	4.32378401781336	0.0323888313652353
pliXRz	aGwo0E	outcome	SYN3	Weighted median	66	0.545577109757412	0.144382744098551	0.0001576578258487							1.72560395795218	1.30028949914353	2.29003542800398	0.000307225054055
x4PTr7	aGwo0E	outcome	SYK	Weighted median	1475	0.15266671201628	0.01579967386439	4.34478640296229e-22							1.1649366548456	1.1294144936668	1.20157605326714	2.37020188455771e-21
rN4wAB	aGwo0E	outcome	SYCP3	Weighted median	287	0.271205968469782	0.0521209126461904	1.95674831827854e-07							1.31154517952033	1.18417813817368	1.45261148003959	4.91455196583196e-07
qDTUAe	aGwo0E	outcome	SYCE2	Weighted median	55	1.18527197284678	0.156789650107312	4.04212958937946e-14							3.27157648044778	2.40599673045024	4.44855661354792	1.52787550194425e-13
v62lxq	aGwo0E	outcome	SYCE1L	Weighted median	919	-0.173543	0.0208419525687325	8.31946285450163e-17							0.840681269692417	0.807031234062099	0.875734379764131	3.59648602905971e-16
hsSgug	aGwo0E	outcome	SYBU	Weighted median	121	0.267986481353718	0.131474284886851	0.0415180801325772							1.30732946657084	1.01035007830023	1.69160211977193	0.0595874066814743
1Yw3i6	aGwo0E	outcome	SWI5	Weighted median	49	-1.09702	0.289605411243738	0.0001518676377821							0.333863191420724	0.189256776063311	0.588959787354424	0.0002964211966871
uGHuFy	aGwo0E	outcome	SVIP	Weighted median	236	-0.552573	0.0680653478041407	4.72887276983383e-16							0.575467415748648	0.50359608385213	0.657595952802656	1.9739797334017803e-15
Zk7qPs	aGwo0E	outcome	SV2B	Weighted median	9	-1.49974	1.16354947487829	0.197421633027984							0.223188969491829	0.0228159953102434	2.1832629006748	0.249079881923576
wPvtBi	aGwo0E	outcome	SV2A	Weighted median	40	-0.701378	0.19426021544093	0.0003056006864701							0.495901679631817	0.338873763258845	0.725693466194416	0.0005785625872267
WtbnC8	aGwo0E	outcome	SUZ12	Weighted median	251	1.23244006647763	0.111719420202536	2.6913970409956097e-28							3.42958775695346	2.7551448073653	4.26913030168202	1.8521115477964398e-27
OZjotv	aGwo0E	outcome	SUV39H2	Weighted median	16	0.045992840902364	0.473048298018631	0.92254650606027							1.04706691487583	0.414293001158559	2.64631340901651	0.940634533236239
TKvZ7i	aGwo0E	outcome	SUSD4	Weighted median	781	-0.0410704	0.0180578369748342	0.0229429648016918							0.959761523313435	0.926386449736744	0.994339006032191	0.0343522136717072
xYgScD	aGwo0E	outcome	SUSD2	Weighted median	731	0.558789413589216	0.0378722609412909	2.87463091066983e-49							1.74855444226232	1.62346017535731	1.88328773564302	3.69639226652321e-48
jhKx4W	aGwo0E	outcome	SUSD1	Weighted median	1515	-0.0398679	0.0068133614186414	4.87348540311811e-09							0.960916325281215	0.948169369712882	0.973834647781925	1.3703175832114e-08
Uii31Y	aGwo0E	outcome	SURF4	Weighted median	61	-0.295188	0.164319727223702	0.0724266635087049							0.744391358437291	0.539423108323149	1.02724278208742	0.0997378245943011
3xpWF0	aGwo0E	outcome	SURF2	Weighted median	96	-0.140219	0.0998882902222422	0.160390715617635							0.869167817599198	0.714623030471586	1.0571345491785	0.206520603723363
c9rGaM	aGwo0E	outcome	SUPV3L1	Weighted median	1228	-0.00671333	0.0193233907089137	0.728275940411667							0.993309155001538	0.956392223121431	1.03165108786607	0.777269249371505
c4dbS3	aGwo0E	outcome	SUPT7L	Weighted median	193	-0.415552	0.109558927738243	0.0001488654839368							0.659975860103451	0.532438692970533	0.818062514369885	0.0002908487504126
MbrxVZ	aGwo0E	outcome	SUPT4H1	Weighted median	1524	0.114219172559756	0.0151348858272832	4.46260148886392e-14							1.12099778991675	1.08823247375301	1.15474962869326	1.68243209214243e-13
c0tJag	aGwo0E	outcome	SUN2	Weighted median	919	0.0182894247905767	0.0119671835866088	0.126438523764137							1.0184577006442	0.99484706710465	1.04262868364306	0.166066953515172
sfIx2A	aGwo0E	outcome	SUMO1P1	Weighted median	53	-0.0368848	0.0482984939824579	0.445055443409045							0.963787159190101	0.876735572132411	1.05948214917352	0.511267854220138
E8I0O4	aGwo0E	outcome	SUMO1	Weighted median	56	0.0863671672055092	0.223738085938148	0.699482547698732							1.09020654291758	0.703167970938391	1.69027935762513	0.75142507401845
jGqk1b	aGwo0E	outcome	SUGT1P3	Weighted median	39	1.96821727462975	0.221460216653295	6.25256360401035e-19							7.15790452927926	4.63740642572755	11.0483301541202	2.9721485589235397e-18
MqCpor	aGwo0E	outcome	SUGP1	Weighted median	139	-0.439773	0.124653861731984	0.0004187817766013							0.64418241604592	0.504546684521908	0.822463010605196	0.0007813095207491
MlmwPk	aGwo0E	outcome	SUDS3P1	Weighted median	3	-0.802284	0.496711157715511	0.106268915783049							0.448303705368079	0.169341442641841	1.18681055925463	0.141907320965238
0O8UOc	aGwo0E	outcome	SUCO	Weighted median	75	-0.64319	0.166150214533295	0.0001083285252817							0.525612842950633	0.379521208718054	0.727940505901706	0.0002146626342502
7c6Uw1	aGwo0E	outcome	STYX	Weighted median	189	0.151206598710982	0.10530114678565	0.151018144958298							1.16323695651407	0.946311342873113	1.42988903936404	0.195486687157731
zD8iAu	aGwo0E	outcome	STYK1	Weighted median	397	0.343589228017849	0.0722884360591744	2.00388916172058e-06							1.40999932831532	1.22373039382108	1.62462100793446	4.65391765026711e-06
0fa0x1	aGwo0E	outcome	STXBP6	Weighted median	31	-0.152732	0.386476107046481	0.692701943579152							0.858359839277292	0.402433648512402	1.83081513289869	0.74527536300886
VSQRZq	aGwo0E	outcome	STXBP5	Weighted median	714	-0.177273	0.0386160096672813	4.41864878202623e-06							0.837551405508278	0.776498928423229	0.903404153169089	9.95959967964421e-06
ZfsEGW	aGwo0E	outcome	STXBP4	Weighted median	450	0.188350697590109	0.0177123631047253	2.07360439407971e-26							1.20725682317728	1.16606457250858	1.24990422612069	1.33824007682194e-25
87QJTv	aGwo0E	outcome	STXBP2	Weighted median	279	-0.0909589	0.0475104161246253	0.0555556419503035							0.913055203585382	0.831869790783778	1.00216381701861	0.0780518535795371
zhk0W2	aGwo0E	outcome	STX5	Weighted median	115	0.20218602615002	0.167087683436159	0.226256091113023							1.22407569702191	0.882227046837309	1.69838514633068	0.281512357559479
UTvh8X	aGwo0E	outcome	STX2	Weighted median	864	0.0190013140015058	0.0085684150627098	0.026582143717639							1.01918298782451	1.0022096581829	1.0364437761997	0.0393868887913898
eYjPMu	aGwo0E	outcome	STX18	Weighted median	13	-0.546903	0.434439425472829	0.208077090598818							0.578739393144944	0.24699077904423	1.35608011956511	0.261109820083146
vMeYnS	aGwo0E	outcome	STX16-NPEPL1	Weighted median	233	0.303268270411386	0.053216582641847	1.20685461421272e-08							1.35427772835695	1.22013775759654	1.50316483045033	3.30390650409518e-08
7Pspky	aGwo0E	outcome	STX16	Weighted median	357	-0.374504	0.0426810141977642	1.7167397277333098e-18							0.687630049427851	0.632446850744998	0.747628175109367	8.013236278269901e-18
Svp9Ja	aGwo0E	outcome	STX12	Weighted median	73	1.96637080073732	0.658993945354068	0.0028460150903925							7.14469984024999	1.9635276321518	25.9974624096971	0.004822061990214
xbPJSU	aGwo0E	outcome	STUB1	Weighted median	62	-0.731536	0.137321712923548	9.97570056308279e-08							0.481169559964046	0.36762712094511	0.629779829194272	2.56321597190398e-07
0eD8CP	aGwo0E	outcome	STT3B	Weighted median	511	0.482067080160216	0.0562566785401266	1.04329522806576e-17							1.61941841250509	1.45034867090863	1.80819691661973	4.70101369501394e-17
4V7qPS	aGwo0E	outcome	STT3A	Weighted median	1089	0.0328578024893821	0.0208597478504736	0.11521551215637							1.0334035813763	0.992004829464276	1.07653000296186	0.152735448172946
m07wgg	aGwo0E	outcome	STRN4	Weighted median	45	-0.24124	0.328705445382107	0.463003965801096							0.785653037739129	0.412506760284746	1.49634080004566	0.528965623464976
478pyn	aGwo0E	outcome	STRIP1	Weighted median	63	0.155934098237332	0.0735428790748901	0.0339794567518989							1.16874917792091	1.01185983190586	1.34996429131687	0.0494712311949316
JCAUER	aGwo0E	outcome	STRBP	Weighted median	256	1.51431490328699	0.100179939875774	1.2712554987568999e-51							4.54630540079426	3.73580087936039	5.53265376414543	1.72965671729791e-50
C7u50M	aGwo0E	outcome	STRAP	Weighted median	3	1.42544582460487	2.04127137954102	0.484981629157879							4.15971193135432	0.0761198597306589	227.315229075262	0.550553721944132
Kl3p2V	aGwo0E	outcome	STRA13	Weighted median	640	0.0006253210391517	0.0416853152131496	0.988031389752784							1.00062551659311	0.9221218583246	1.08581248282781	0.991080683599456
k5EwTh	aGwo0E	outcome	STOX2	Weighted median	45	0.750178758171772	0.243415524409087	0.0020569399001861							2.11737848149112	1.31401105113802	3.41191318748713	0.0035443131348364
fs4uVi	aGwo0E	outcome	STOML1	Weighted median	496	0.12164108327163	0.0277219902830163	1.14454887837018e-05							1.12934868689369	1.06962271374408	1.19240966015393	2.48545706541196e-05
jjZl64	aGwo0E	outcome	STMN1	Weighted median	499	-0.423205	0.0360369676275472	7.61525378585322e-32							0.654944635993065	0.610280233167512	0.702877879543492	5.94432584582883e-31
9rHWhw	aGwo0E	outcome	STK40	Weighted median	13	-0.162022	0.361258545719663	0.653796620823384							0.85042220796615	0.418914227699609	1.72641052506963	0.710175995658355
Frib1A	aGwo0E	outcome	STK4	Weighted median	196	-0.0137675	0.0537475282340848	0.797834167631898							0.986326850091162	0.887707800452335	1.0959018887916	0.838268851202013
UQZV6j	aGwo0E	outcome	STK38	Weighted median	369	-0.322294	0.0475576398643553	1.22772700927094e-11							0.724485247738574	0.660005669694474	0.795264189827031	4.0462573341569197e-11
b8kXxy	aGwo0E	outcome	STK35	Weighted median	200	0.456262851306473	0.0859154189246246	1.09261926178428e-07							1.57816511301469	1.33358210022055	1.86760539416716	2.79812707427966e-07
8aF5VQ	aGwo0E	outcome	STK32B	Weighted median	116	-0.350784	0.0866601951078501	5.16980260777803e-05							0.704135534898846	0.594141125630318	0.834493405891213	0.0001056391439103
9IEAGg	aGwo0E	outcome	STK31	Weighted median	202	1.07256801639571	0.125572592557637	1.3258453887430002e-17							2.92287586360532	2.28518214606397	3.73852181926131	5.94003262356676e-17
HekhF1	aGwo0E	outcome	STK3	Weighted median	239	-0.0183722	0.195244663883309	0.925031099222684							0.981795555784393	0.669615424164174	1.43951659202171	0.942448162402522
xtjE4P	aGwo0E	outcome	STK25	Weighted median	314	0.10240099321904	0.0660079385632928	0.120819362833055							1.10782761403405	0.973385997953685	1.26083796664062	0.159415602319358
oH1cPi	aGwo0E	outcome	STK17A	Weighted median	266	-0.0149654	0.0914401942835735	0.869996399282427							0.985146042803404	0.82350293707863	1.17851762507866	0.898026203250031
kC4kZF	aGwo0E	outcome	STK16	Weighted median	5	-0.377215	0.915215991188008	0.680222273863729							0.685768430918115	0.11405909186041	4.12311139053639	0.734145213822668
COyTRb	aGwo0E	outcome	STAT3	Weighted median	962	-0.771081	0.0422753082617745	2.50733802589205e-74							0.462513027137113	0.425734162225512	0.502469191462778	5.721479006611771e-73
yf0p4Q	aGwo0E	outcome	STARD7	Weighted median	17	-0.239705	0.373591570958544	0.521118493086909							0.786860219363547	0.378346764528399	1.63645909748589	0.586015135071761
uBwSun	aGwo0E	outcome	STARD3NL	Weighted median	438	0.480790143933338	0.0574433368440913	5.77084079966463e-17							1.6173518381903	1.44513277581306	1.81009455482444	2.51120274839982e-16
GHsWWr	aGwo0E	outcome	STARD13	Weighted median	10	2.59197666061401	0.952050487815162	0.0064786077558311							13.3561460958405	2.06670944941043	86.3143285982091	0.0104914497971392
GPscHe	aGwo0E	outcome	STAP2	Weighted median	80	0.951220343287268	0.159352090481177	2.3827446885953203e-09							2.58886703889306	1.89437741933481	3.53796053345079	6.83751950805498e-09
QxCZvQ	aGwo0E	outcome	STAC3	Weighted median	199	0.963084832997949	0.0761467923088197	1.15139357760277e-36							2.6197655603789	2.25655004924608	3.04144443578389	1.0496825413233e-35
Y6Htkv	aGwo0E	outcome	STAC	Weighted median	158	0.191629797455608	0.116351913470273	0.0995612328205855							1.21122203647599	0.964235275000227	1.52147391791354	0.133643723101711
86vm3l	aGwo0E	outcome	STAB2	Weighted median	38	-1.25747	0.269292491684284	3.01900832157089e-06							0.28437334395977	0.167749984348439	0.482075745455138	6.90276614571975e-06
v3r5nw	aGwo0E	outcome	ST8SIA6	Weighted median	184	0.720215669314543	0.122798119124566	4.4902909338390805e-09							2.05487633662882	1.61531721578601	2.61404801333862	1.26538042897982e-08
zeW7QQ	aGwo0E	outcome	ST7	Weighted median	142	1.68077557854072	0.199119200500868	3.14493473951392e-17							5.36971899535968	3.63461047454702	7.9331422971041	1.38499920606352e-16
4awb64	aGwo0E	outcome	ST6GALNAC1	Weighted median	816	0.0114584445559259	0.0169142476686511	0.498124703441363							1.0115243439929	0.978540130351934	1.04562037544876	0.56366052186522
XS9eEE	aGwo0E	outcome	ST5	Weighted median	38	-0.746934	0.170701949659354	1.21063048756903e-05							0.473816824911946	0.339083022097824	0.662086772085184	2.6222719211405e-05
5f7JYc	aGwo0E	outcome	ST3GAL4	Weighted median	325	-0.116832	0.0563412354479338	0.0381123589912354							0.889734939870382	0.796713209502475	0.993617595119957	0.0550159207352735
72U0sU	aGwo0E	outcome	ST3GAL2	Weighted median	171	0.213208079078759	0.115917792255805	0.0658704595460027							1.23764215189122	0.986106622572446	1.55333922425351	0.0913741313233889
PB33EO	aGwo0E	outcome	ST3GAL1	Weighted median	361	0.0523488298993351	0.0508376664933089	0.303138989248017							1.05374325556363	0.953807894340033	1.16414935883304	0.36470729089009
SH8L6y	aGwo0E	outcome	ST14	Weighted median	552	0.0756505835186231	0.0397620118995066	0.0570947964217623							1.0785856327097	0.997719644166361	1.16600587538778	0.080054380615567
6kqFvU	aGwo0E	outcome	SSPN	Weighted median	83	-0.0406391	0.153776665570039	0.791569186211286							0.960175598543984	0.710318824878521	1.29792024052997	0.83292635796371
vPLmUO	aGwo0E	outcome	SSNA1	Weighted median	4	0.633659953861432	0.655367538488147	0.333605407967331							1.88449513825328	0.521596790497811	6.80855785694322	0.397240424445276
STEuqj	aGwo0E	outcome	SSH1	Weighted median	240	0.0843363187555181	0.0289919238782246	0.0036263437965249							1.08799474532277	1.02789410184188	1.15160945444559	0.00606667022355
1HPXNj	aGwo0E	outcome	SSFA2	Weighted median	94	0.279887009143361	0.207951343650678	0.178326555015701							1.32298031921233	0.880119465554534	1.98868107515424	0.22732206934436
KqG0Wy	aGwo0E	outcome	SSBP3	Weighted median	50	-0.176635	0.285031040281004	0.535452013211538							0.838085491543058	0.479363544394606	1.46524970317053	0.599771812916667
0Yf7Zu	aGwo0E	outcome	SSB	Weighted median	259	-0.54844	0.0557065997966155	7.19325109259237e-23							0.577850682031223	0.518080462967497	0.644516507747366	4.0493184107491e-22
uR8jRC	aGwo0E	outcome	SS18L1	Weighted median	449	0.0900026847451157	0.074157572344477	0.224874465714276							1.09417722128822	0.946157572146352	1.26535349589827	0.280004870190603
Wd2PM0	aGwo0E	outcome	SRSF9P1	Weighted median	11	1.19561290583722	0.325455242433527	0.0002390979646891							3.30558316096621	1.74668661546523	6.25577590010499	0.0004575872297799
JHYNnz	aGwo0E	outcome	SRSF9	Weighted median	234	0.500464021327337	0.0697619955799323	7.290276603388619e-13							1.64948649005789	1.43868645028624	1.89117349394801	2.5792146593899198e-12
LqeJAC	aGwo0E	outcome	SRSF8	Weighted median	128	-0.632674	0.131226207977235	1.42663663150421e-06							0.531169581728688	0.410706137798327	0.686965931569234	3.35507828372458e-06
CLpkgR	aGwo0E	outcome	SRSF7	Weighted median	63	0.0871367743386976	0.227934371437706	0.702247105941703							1.09104589659452	0.697945266759359	1.70555085788148	0.753755703713862
3ex7qy	aGwo0E	outcome	SRSF6	Weighted median	109	-0.609008	0.17006232454305	0.0003421643152186							0.543889913750645	0.389718508656271	0.759051037374754	0.0006440824410267
lQn7fl	aGwo0E	outcome	SRSF5	Weighted median	32	2.97675712067347	0.364902181361412	3.41506215649425e-16							19.6240748405307	9.59794338894628	40.1236283379483	1.435500006103e-15
8gSsQu	aGwo0E	outcome	SRSF2	Weighted median	159	-0.105909	0.113995777050832	0.352858678775819							0.899506710204095	0.719398028133303	1.12470744992405	0.417169868800387
azTfxt	aGwo0E	outcome	SRRM2	Weighted median	13	-0.657229	0.793693073380024	0.407634163007992							0.518285623829513	0.109386563642993	2.45569454713879	0.473609523649111
rlEzSW	aGwo0E	outcome	SRRM1	Weighted median	39	0.0974237712768308	0.133035858456118	0.463978084623363							1.1023274093496	0.849313832575977	1.43071462019866	0.529949583026564
GCOPJ1	aGwo0E	outcome	SRPK2	Weighted median	599	-0.138	0.0329088244159362	2.74798576543022e-05							0.871098675788903	0.816685409331197	0.929137332798183	5.76543681868388e-05
DTwbYJ	aGwo0E	outcome	SRP19	Weighted median	402	0.364193672234327	0.0416356474397714	2.1878926300201e-18							1.43935294986728	1.32655824611188	1.56173837097908	1.0173031491847801e-17
0v2t7x	aGwo0E	outcome	SRP14	Weighted median	607	-0.200714	0.015371240534899	5.73973882915259e-39							0.818146506945756	0.793865294810186	0.843170385710824	5.616167902092e-38
oQoHTf	aGwo0E	outcome	SRGAP2C	Weighted median	78	0.000803285415241	0.0288007313918719	0.977748969859409							1.00080360813538	0.945873775901034	1.05892338658259	0.983001940576006
UD9Elq	aGwo0E	outcome	SRGAP1	Weighted median	37	-0.563664	0.151493211282352	0.0001986528505267							0.5691197840561	0.422912048665998	0.765873967473235	0.000383496024953
HqFM2G	aGwo0E	outcome	SRFBP1	Weighted median	149	-1.75218	0.208865657596559	4.90178130253282e-17							0.173395556421092	0.115145753655613	0.261112703091978	2.14057015547626e-16
YybRjt	aGwo0E	outcome	SRF	Weighted median	84	0.0436357327434331	0.204624443375256	0.831133608953908							1.04460177135414	0.699472935892448	1.56002156012507	0.865999360592861
LSccyP	aGwo0E	outcome	SREK1	Weighted median	3	4.40338832747584	1.66097452474018	0.0080233120217025							81.7273189687882	3.1514991459879	2119.42137897431	0.012833091067704
MCRTe4	aGwo0E	outcome	SREBF2	Weighted median	28	0.194229286847708	0.283064802315074	0.492608783525901							1.21437469118222	0.697273376942507	2.11496084512847	0.558262834228663
nkfcdJ	aGwo0E	outcome	SRCRB4D	Weighted median	292	0.614130996485455	0.0586497381416405	1.17193624459263e-25							1.84804993967026	1.64736577101254	2.07318170597661	7.35669203197072e-25
F9xOuW	aGwo0E	outcome	SRCAP	Weighted median	28	1.56770307435461	0.353106929394558	9.00674859524907e-06							4.79562035018736	2.40034743807586	9.58110237639866	1.97531919049583e-05
lJzCjo	aGwo0E	outcome	SRC	Weighted median	141	0.34137603923234	0.166459804638641	0.0402862684472719							1.40688218430077	1.0152296287627	1.94962540929306	0.0579305658429554
z5Hsoc	aGwo0E	outcome	SRBD1	Weighted median	773	-0.0172765	0.0163936398224725	0.291948878809512							0.982871848914239	0.951792653635409	1.01496588327119	0.352799531819048
M0q9rU	aGwo0E	outcome	SPTY2D1	Weighted median	39	0.157567865848285	0.289310397533834	0.586006248252546							1.1706602031336	0.663995097166716	2.06393890112821	0.647581550349546
7PC1XW	aGwo0E	outcome	SPTBN4	Weighted median	8	-1.32262	0.561494247978072	0.0184958434744241							0.266435861580145	0.088641914299991	0.800840876424545	0.0280808283702205
JYbkyW	aGwo0E	outcome	SPTAN1	Weighted median	69	-1.18211	0.25649342895926	4.05139990296686e-06							0.30663154223363	0.185474928737696	0.506930523346066	9.16233963864828e-06
jUpYuw	aGwo0E	outcome	SPTA1	Weighted median	463	1.09542437187563	0.0735758963512403	3.92278770380242e-50							2.99045147765659	2.58885479808537	3.45434593196662	5.1651780631916596e-49
4vGz5B	aGwo0E	outcome	SPRYD3	Weighted median	345	0.242144563691231	0.0890974636953584	0.0065727632091786							1.27397835051751	1.0698447396862	1.51706203468682	0.0106333272351795
XwtMV0	aGwo0E	outcome	SPRY2	Weighted median	284	1.26619691170781	0.0834564896049097	5.4248774851221206e-52							3.54733604421267	3.01205386150092	4.17774501691677	7.44252214377917e-51
5lkrdB	aGwo0E	outcome	SPRN	Weighted median	46	0.248730814331441	0.232531639980966	0.284770401542854							1.28239678376822	0.812994284144792	2.02282050820198	0.34501096567726
CLEqn3	aGwo0E	outcome	SPPL2B	Weighted median	102	-0.386002	0.222460391636345	0.0827142724532404							0.679769092850598	0.439540913391781	1.05129239512466	0.112729449265137
cwUCdF	aGwo0E	outcome	SPOPL	Weighted median	4	1.96565305493984	2.05686057685746	0.339245591378259							7.13957360185346	0.126717677904552	402.260458518486	0.403053002521768
6BrjTf	aGwo0E	outcome	SPOCK1	Weighted median	27	0.57396297597018	0.29417937903838	0.0510493602304942							1.77528855510309	0.997374844817087	3.15994479934775	0.0721620516600504
bbNXEb	aGwo0E	outcome	SPNS3	Weighted median	32	-1.55101	0.274971697725052	1.69426811043169e-08							0.212032811595616	0.123692235277294	0.363465928902934	4.59395869701738e-08
iupw3l	aGwo0E	outcome	SPN	Weighted median	63	-0.406555	0.114567957153094	0.0003873006657735							0.665940717367572	0.532002111115949	0.833600148912532	0.0007250678233813
ExQjw3	aGwo0E	outcome	SPIN1	Weighted median	4	0.5835164152018	1.85494167843253	0.753085126049176							1.79232993873315	0.0472563012320279	67.9792223582229	0.799363065782418
7y8jPr	aGwo0E	outcome	SPG21	Weighted median	151	0.186050904099844	0.0722647351317456	0.0100363631196815							1.20448357196912	1.04541300061768	1.38775840197731	0.0158274474798616
eT2JV8	aGwo0E	outcome	SPG20	Weighted median	1117	0.0822578777775762	0.0146084916639892	1.7934837529349e-08							1.08573576085647	1.05508911664714	1.11727258276404	4.85604942706581e-08
RP3050	aGwo0E	outcome	SPG11	Weighted median	102	0.651472453933328	0.185607743368323	0.0004482040855402							1.91836345222337	1.33333227263993	2.76009094682746	0.0008332753711642
5bwx2y	aGwo0E	outcome	SPEN	Weighted median	212	-0.0407419	0.0750730960259846	0.58733842523757							0.960076850023216	0.828709826202329	1.11226816529319	0.648770938446321
d3CJhf	aGwo0E	outcome	SPEG	Weighted median	27	-0.468378	0.134489264981738	0.0004964906642602							0.626016814960811	0.480957193977066	0.814827301725245	0.0009190117466382
DERVPz	aGwo0E	outcome	SPEF2	Weighted median	613	0.473168661336086	0.0395828991523321	6.197397287771939e-33							1.60507207374856	1.48525456082923	1.73455542899605	5.02990008555605e-32
Cn4QqD	aGwo0E	outcome	SPCS2	Weighted median	306	-0.19027	0.0391044637605159	1.1406640593469e-06							0.826736182454679	0.765738624064951	0.892592712316628	2.7035226695411e-06
xK6CVj	aGwo0E	outcome	SPATS2L	Weighted median	869	0.560274251422817	0.03620520192628	5.1200698502540705e-54							1.75115269056362	1.63119366340255	1.87993358144344	7.3874652690450305e-53
OPWisq	aGwo0E	outcome	SPATS2	Weighted median	15	0.0702731931413673	0.414542567062249	0.86538776149177							1.07280122316009	0.476051023484701	2.4176	0.894259362051914
p11mwL	aGwo0E	outcome	SPATC1L	Weighted median	1884	-0.206434	0.0116755874958896	5.89068283304247e-70							0.813479744912477	0.795075338969133	0.832310176090821	1.2299974809839301e-68
KBwpF7	aGwo0E	outcome	SPATA7	Weighted median	898	-0.239748	0.0270797198680322	8.48947064418892e-19							0.786826492300111	0.746153621503755	0.829716443294353	4.01037787564415e-18
epDZjq	aGwo0E	outcome	SPATA6	Weighted median	187	-0.157226	0.176826277106467	0.373918951711426							0.854510710624449	0.604226745367193	1.2084677816242	0.438927861317292
lwVLSB	aGwo0E	outcome	SPATA24	Weighted median	433	0.350163967288362	0.0418584129506458	5.98919088923737e-17							1.41930024832825	1.30750596345331	1.54065316045235	2.60461265405804e-16
68PLer	aGwo0E	outcome	SPATA20	Weighted median	1585	0.0218812918417896	0.0127522054300629	0.0861834683701191							1.0221224429958	0.996891809655118	1.04799164599128	0.117082961305898
DYLIjS	aGwo0E	outcome	SPATA2	Weighted median	84	-0.715982	0.233753590760935	0.0021914619214487							0.488711912567593	0.309084945027708	0.772730400906662	0.0037615451777267
YFUhpQ	aGwo0E	outcome	SPATA1	Weighted median	379	0.0204220503557662	0.0707464307877036	0.772837403704725							1.0206320072405	0.888481943552754	1.17243766377332	0.816754034019412
235wmu	aGwo0E	outcome	SPAST	Weighted median	346	1.20184353685282	0.114306470823698	7.42919224860936e-26							3.32624332602929	2.65860846921511	4.16153592831242	4.69881429596785e-25
qDra89	aGwo0E	outcome	SPAG8	Weighted median	367	0.257464261753687	0.0660467168574192	9.69046079193576e-05							1.29364557752988	1.13656743327612	1.47243254668907	0.0001930022233261
nrjho9	aGwo0E	outcome	SPAG5	Weighted median	42	-1.26023	0.370360243558188	0.0006671769884843							0.283587772576154	0.13722413368536	0.58606327177917	0.0012176041655741
DGyNH9	aGwo0E	outcome	SPAG4	Weighted median	4	-2.35539	1.05675446196741	0.0258212805374986							0.0948566413800588	0.0119547413848817	0.752653873824816	0.0383388549993702
NvmqUZ	aGwo0E	outcome	SPAG16	Weighted median	4	0.798223835116391	0.784802569106622	0.309105168097477							2.22159150929638	0.477119068220463	10.3443126944933	0.371080934572309
B2sKfa	aGwo0E	outcome	SPACA3	Weighted median	350	1.1960322901278	0.0573593823392045	1.47550230478767e-96							3.30696976135401	2.95532285104526	3.70045830987361	5.08682765969472e-95
IGQpRC	aGwo0E	outcome	SPA17	Weighted median	114	0.0782372644660148	0.128904073837907	0.543889568248714							1.08137920109339	0.839948481766239	1.39220559586988	0.607624801343055
FXg32d	aGwo0E	outcome	SP3	Weighted median	30	0.973110315319739	0.255575517239614	0.0001403642332554							2.64616207147633	1.6034896757045	4.3668342956081	0.0002750005637499
4CztZS	aGwo0E	outcome	SP2	Weighted median	262	-0.5231	0.0879625146747565	2.7335053873927903e-09							0.592680422998898	0.498821745898057	0.704199619793522	7.8154619279684e-09
w8IFb3	aGwo0E	outcome	SP140	Weighted median	864	0.0650191806671332	0.0325904687472527	0.0460388791490576							1.06717949340252	1.00114251409505	1.1375723786621	0.0656598945323583
3mKPGK	aGwo0E	outcome	SOX8	Weighted median	517	0.451145828394944	0.0404719767734191	7.39647603334986e-29							1.57011023205412	1.45037298431877	1.69973252911833	5.20302015485666e-28
SvUjH1	aGwo0E	outcome	SOX6	Weighted median	101	0.944274196479359	0.162172789317435	5.79243287280109e-09							2.57094669908342	1.87089238715117	3.53294875478792	1.62031346591355e-08
ncQcwE	aGwo0E	outcome	SOX4	Weighted median	300	-0.353658	0.0931916949596549	0.0001476704911459							0.702114874808936	0.584900242966003	0.842819443753628	0.0002886281561197
NBX1IT	aGwo0E	outcome	SOX15	Weighted median	93	1.03793061551363	0.168815555140077	7.8312132392446e-10							2.82336833022876	2.02800414059239	3.93066688996513	2.31862296331296e-09
F6o3hh	aGwo0E	outcome	SOX13	Weighted median	17	1.01477426043109	0.483274592006221	0.0357474813140988							2.75874057017351	1.06989023606918	7.11348629695233	0.0518521629924666
YLVdhU	aGwo0E	outcome	SOS2	Weighted median	465	-0.114926	0.0441793895063617	0.009285796798069							0.891432102835693	0.817489182593428	0.97206325280671	0.0147265326703799
6v7ibX	aGwo0E	outcome	SOS1	Weighted median	940	0.343188630235474	0.037131152801119	2.40564569437321e-20							1.40943459883349	1.3105037047415	1.51583385930279	1.21918459416413e-19
kYdGpn	aGwo0E	outcome	SORCS2	Weighted median	163	-0.0915702	0.0835716914968961	0.273206221138962							0.912497220488849	0.774629247122651	1.07490283963941	0.33273855987891
TDZsms	aGwo0E	outcome	SORBS3	Weighted median	195	0.235013044854604	0.110766383387186	0.0338629316377625							1.26492526939149	1.0180722961296	1.57163292157933	0.0493227906038204
YILQgy	aGwo0E	outcome	SORBS1	Weighted median	388	-0.839084	0.152898098311458	4.06815165614577e-08							0.432105937463202	0.32021431663413	0.583095544114254	1.07538603600283e-07
4pbaOa	aGwo0E	outcome	SOD1	Weighted median	120	0.253696400598556	0.123310939071096	0.0396505130736458							1.28878047188681	1.01207933293316	1.64113133295895	0.0570795004772225
IYDGe5	aGwo0E	outcome	SOBP	Weighted median	69	1.19577534002588	0.192916503104481	5.70368591201182e-10							3.30612014429607	2.26519080032474	4.82539060592744	1.70372570960227e-09
3wZNYk	aGwo0E	outcome	SOAT2	Weighted median	283	-0.528552	0.0655056696334934	7.09927693267686e-16							0.589457821762145	0.518433650811624	0.670212134363986	2.9339599992055804e-15
JGuIVB	aGwo0E	outcome	SNX9	Weighted median	131	1.23104962586736	0.156866997934218	4.2363975091403605e-15							3.42482243257773	2.51831571226333	4.65764027821033	1.68470374421686e-14
1mSOCy	aGwo0E	outcome	SNX3	Weighted median	155	0.249560241548797	0.297055962197588	0.400845662225364							1.28346087979823	0.717007165751046	2.29742729034927	0.466666154139736
J6vUcY	aGwo0E	outcome	SNX29P2	Weighted median	400	0.150361940275554	0.0314026536604678	1.68290461438171e-06							1.16225483344401	1.09287598422413	1.23603804765001	3.9325213942091e-06
B0e5bm	aGwo0E	outcome	SNX24	Weighted median	65	-0.93882	0.28791435081311	0.0011111416348469							0.391089239214829	0.222432489955588	0.687627931783586	0.0019772973916267
aSJ76H	aGwo0E	outcome	SNX20	Weighted median	39	-0.68316	0.389747189439331	0.0796313104572966							0.505018459381883	0.235259812969639	1.08409354363197	0.108866319834172
le73yB	aGwo0E	outcome	SNX2	Weighted median	645	-0.960539	0.0539150369366206	5.32968162649051e-71							0.382686501341816	0.344310080185143	0.425340316003794	1.1388506115636299e-69
bREkqR	aGwo0E	outcome	SNX18	Weighted median	503	0.266217718788489	0.0400696396595975	3.05539573576266e-11							1.30501915494863	1.20644886837411	1.41164291287206	9.8393661126317e-11
AKXpYM	aGwo0E	outcome	SNX14	Weighted median	117	0.191157495110091	0.182988209059347	0.296187635655958							1.2106501085393	0.845777129283063	1.73293132973296	0.3573274179319
T9J4Bi	aGwo0E	outcome	SNX10	Weighted median	216	0.179043801690158	0.0768341112777376	0.0197921759584476							1.19607313304529	1.02885747971986	1.39046560655058	0.0299229693324108
Rja5j1	aGwo0E	outcome	SNURF	Weighted median	100	0.0613440145635117	0.0498456548328822	0.218442840837112							1.06326462979536	0.964299383385178	1.17238659741244	0.27279402593215
okuGz9	aGwo0E	outcome	SNUPN	Weighted median	1404	-0.132278	0.017853481486456	1.27156906049397e-13							0.876097164261169	0.845970237881533	0.90729697908586	4.69010947406179e-13
NCAa3o	aGwo0E	outcome	SNRPN	Weighted median	15	0.545899357293898	0.329674985180512	0.0977478780473331							1.72616011918256	0.904598921969362	3.29386724292079	0.131380956011873
atnq27	aGwo0E	outcome	SNRPD3	Weighted median	9	-0.121289	0.828391028415502	0.883594045151527							0.885778286090893	0.174656338322415	4.49226852942345	0.909213444432326
OUJ3MS	aGwo0E	outcome	SNRPA1	Weighted median	51	-0.406877	0.139060979976384	0.0034347586350595							0.665726276297868	0.506902698375986	0.874312715977486	0.0057632503769265
7e1o3a	aGwo0E	outcome	SNRNP70	Weighted median	154	-0.737773	0.0941686426963872	4.703817418631761e-15							0.478177853130793	0.397586373089869	0.575105372570427	1.8662278504068802e-14
GAZ4X0	aGwo0E	outcome	SNRNP35	Weighted median	708	0.732454466582021	0.0530504468918465	2.32054904060821e-43							2.08018007936197	1.87475051269665	2.30812000491211	2.5618342849869898e-42
x9c3Zv	aGwo0E	outcome	SNRNP200	Weighted median	27	-0.705953	0.325102779920297	0.0298950895493402							0.493637715524567	0.261020886784176	0.93355821900106	0.0439464132176646
qKVUy6	aGwo0E	outcome	SNORD15B	Weighted median	27	-2.29738	0.398874404803056	8.427947349379661e-09							0.100521444306578	0.0459970492415396	0.219678456163992	2.3315370304704e-08
EAiqbC	aGwo0E	outcome	SNORD14E	Weighted median	12	-0.888292	0.645806889068587	0.168984092787184							0.411357949928004	0.1160106801685	1.45861883339701	0.216586357140102
cyryCk	aGwo0E	outcome	SNORD12	Weighted median	10	0.877737886934073	0.538911597862206	0.103371603709547							2.40545214251643	0.836499927792829	6.91715542068749	0.138348748085032
eaj4Xm	aGwo0E	outcome	SNORD104	Weighted median	22	0.0814220528165146	0.257984062252585	0.752299420609169							1.08482865495012	0.654275534811539	1.79871193096019	0.798595764334317
tyHISc	aGwo0E	outcome	SNORA77	Weighted median	12	1.57535453478135	0.288173835092348	4.58539229710257e-08							4.83245458766932	2.74706705752563	8.50092729913942	1.2070126580017e-07
2BP2Bx	aGwo0E	outcome	SNORA73B	Weighted median	4	-0.166257	1.4231633963534	0.90700085839139							0.846828363377856	0.0520444299884559	13.7789630356271	0.928020947044773
FOm4UX	aGwo0E	outcome	SNORA66	Weighted median	304	0.0119347773187327	0.0704439373680066	0.865464445901452							1.01200628095039	0.881495537172183	1.16183992940964	0.89431169409665
4IOIDk	aGwo0E	outcome	SNORA63	Weighted median	189	0.121207550593435	0.0283509488394785	1.90918200768906e-05							1.12885918344838	1.06784189465651	1.19336304600191	4.06216110624327e-05
3i62ci	aGwo0E	outcome	SNORA5C	Weighted median	188	-0.316246	0.0881750729288512	0.0003350557126934							0.72888004966751	0.613196865090235	0.866387545417625	0.0006314472180588
yBJLUn	aGwo0E	outcome	SNORA5A	Weighted median	43	0.008401103689743	0.172692596015688	0.961200027749512							1.00843649199219	0.718868820898547	1.41464496555908	0.970373564746438
klzxR6	aGwo0E	outcome	SNORA45	Weighted median	76	-0.707452	0.207295417302212	0.0006430543909114							0.492898385315177	0.328325015902475	0.739964384311409	0.0011754473701928
lyfDas	aGwo0E	outcome	SNORA42	Weighted median	365	0.0004059732011455	0.016977446579693	0.980922403115567							1.00040605561942	0.967664519930124	1.0342554216954	0.985530575960269
5ntwbx	aGwo0E	outcome	SNORA16B	Weighted median	47	2.38838078053063	0.230704241206521	4.0741926218833e-25							10.8958369003421	6.93236113827224	17.1254	2.50469559605402e-24
mdTkte	aGwo0E	outcome	SNHG8	Weighted median	1248	-0.10751	0.0289118684414208	0.0002003658682691							0.898067213290556	0.848591275036789	0.950427777556986	0.0003865914856512
Vq0eTN	aGwo0E	outcome	SNHG7	Weighted median	272	0.256731697707979	0.0316199716721601	4.68921509083236e-16							1.29269824632465	1.21501515896678	1.37534807176551	1.9579216796179103e-15
lcrfhN	aGwo0E	outcome	SNHG6	Weighted median	12	-0.431163	0.837859287741875	0.606831695394358							0.649752711671803	0.125761548651608	3.35697668207318	0.666814925603724
SMFsb3	aGwo0E	outcome	SNHG3	Weighted median	512	-0.225293	0.0485159190567662	3.42228965327316e-06							0.79828209671433	0.725869929485282	0.877918040201096	7.79382177387425e-06
fDtOjs	aGwo0E	outcome	SNHG12	Weighted median	804	0.0383660959920879	0.0204171005720654	0.0602286850947213							1.03911157783685	0.998349941716399	1.08153747105772	0.0841100669870679
8kP7GP	aGwo0E	outcome	SNHG11	Weighted median	67	1.32000826796885	0.214298262340616	7.28930581212905e-10							3.74345232788013	2.45956295546629	5.69753065273928	2.16388399853751e-09
noWUjv	aGwo0E	outcome	SNCG	Weighted median	8	0.615953277722725	0.711766245315849	0.386826396866533							1.8514206766835	0.458814833533099	7.4708973457893	0.452402454533339
EIKieA	aGwo0E	outcome	SNAPC5	Weighted median	377	-0.376117	0.0537442353465436	2.591464010183e-12							0.686522313009151	0.617883560307137	0.762785930127602	8.882682057522429e-12
gziJjH	aGwo0E	outcome	SNAPC4	Weighted median	346	-0.520967	0.044502142062987	1.1798002154359402e-31							0.59394612819208	0.544334759066471	0.648079141224352	9.15577600426983e-31
eVQc0h	aGwo0E	outcome	SNAPC2	Weighted median	33	0.504324285074623	0.376741602518928	0.180685385134445							1.65586624881041	0.791291185366316	3.46508729612619	0.230073717248234
l1QHPO	aGwo0E	outcome	SNAI1	Weighted median	89	-1.33126	0.199608766810806	2.5698162550878e-11							0.264145325924115	0.178621000537338	0.390618980957795	8.31194398651975e-11
4AB1eH	aGwo0E	outcome	SMYD5	Weighted median	53	-0.915332	0.334081326315851	0.006146765661045							0.400383692702666	0.208017855447961	0.770641063657758	0.009986472768765
oWP3BM	aGwo0E	outcome	SMYD2	Weighted median	364	0.250317006027166	0.0385729870455422	8.61571804323368e-11							1.28443252500835	1.19090551105266	1.38530462407641	2.70231933521601e-10
edqrsb	aGwo0E	outcome	SMPDL3B	Weighted median	306	0.309464860964216	0.0460155856117751	1.75329316082472e-11							1.36269568732102	1.24517279713474	1.49131071648555	5.7286998693269496e-11
cLaARl	aGwo0E	outcome	SMOX	Weighted median	752	-0.127489	0.0272294728243334	2.84049828017768e-06							0.880302948821205	0.834553074564929	0.928560813351864	6.50847068946793e-06
Ej1xpn	aGwo0E	outcome	SMN1	Weighted median	6	0.644086308521175	0.224935053588626	0.0041907829669978							1.90424634051187	1.22533417594896	2.95931852430751	0.0069531586149447
u9asc4	aGwo0E	outcome	SMKR1	Weighted median	87	0.113329089996787	0.107864827554636	0.293415496390609							1.12000045325265	0.906570960675539	1.38367658980761	0.354329155907731
Nccvt7	aGwo0E	outcome	SMIM8	Weighted median	886	0.39189488789039	0.0305741633914868	1.30271000785922e-37							1.47978216020265	1.39371037822534	1.57116950254924	1.22632969737556e-36
o9aXKU	aGwo0E	outcome	SMIM5	Weighted median	105	-0.0474845	0.135232178152698	0.725488348197703							0.953625234455648	0.731586664934946	1.24305312190382	0.774729284006898
IO1gWZ	aGwo0E	outcome	SMIM16	Weighted median	295	-0.112196	0.0310240597941477	0.0002986948934567							0.893868758032073	0.841134691999196	0.949908931572834	0.000566052545991
MZM3Gf	aGwo0E	outcome	SMIM15	Weighted median	63	-0.563535	0.258856254728446	0.0294791917937866							0.569193496071975	0.342702313769118	0.945372187329047	0.0433802130402848
y61Lmo	aGwo0E	outcome	SMIM12-AS1	Weighted median	93	-0.0952568	0.0517404830106266	0.0656143859637651							0.909139472181814	0.821463224710397	1.00617356324188	0.0910598210508424
r3YjBh	aGwo0E	outcome	SMIM12	Weighted median	337	0.167068805103218	0.0397133038309344	2.58929146492017e-05							1.18183557882992	1.09333289148095	1.27750234742901	5.44404673964553e-05
YdMqqa	aGwo0E	outcome	SMG7-AS1	Weighted median	35	-0.163219	0.0886910766462812	0.0657234974727192							0.84940547428009	0.713870913452469	1.01067244251159	0.0911881918062389
tCiHXT	aGwo0E	outcome	SMG1P1	Weighted median	284	0.163479316892872	0.0308066131998339	1.11670147894186e-07							1.17760099848793	1.10860044013383	1.25089623045104	2.858614599936e-07
gVEMpK	aGwo0E	outcome	SMC5	Weighted median	367	0.0853905347203575	0.0480477685265546	0.0755352008455963							1.08914233154853	0.991255367079557	1.19669568283484	0.103677535281166
RC4xL4	aGwo0E	outcome	SMC1B	Weighted median	410	0.128492095113556	0.0323912193650607	7.28194929175639e-05							1.13711243251103	1.06716468584649	1.21164493289574	0.0001468181973645
AoCvmK	aGwo0E	outcome	SMARCE1P6	Weighted median	114	-0.975148	0.0623525518961226	3.9328384702243794e-55							0.377136666575082	0.333751475557142	0.426161607339511	5.82241591083294e-54
y02lOU	aGwo0E	outcome	SMARCD1	Weighted median	561	-0.0472159	0.0415881257416681	0.256240676464241							0.953881442477998	0.879212537525755	1.03489175537064	0.314175120724763
fairia	aGwo0E	outcome	SMARCC2	Weighted median	297	-1.14194	0.0762528598820657	1.05824451125622e-50							0.319198837158314	0.274886591266162	0.370654302102956	1.41222186897868e-49
KWhMAS	aGwo0E	outcome	SMARCC1	Weighted median	57	-0.922324	0.320981608930438	0.0040601598987632							0.397593782466772	0.211940777344525	0.745872586846574	0.0067482196029674
MWBoWU	aGwo0E	outcome	SMARCA4	Weighted median	504	-0.0157335	0.0344372667968173	0.647762322047934							0.984389666420252	0.920139030010052	1.05312673818911	0.704550802407126
iCOxGD	aGwo0E	outcome	SMAP2	Weighted median	111	0.148568979465916	0.138627121669771	0.283847368548151							1.16017282311605	0.884139716046376	1.52238492974392	0.344052984650481
cGmeCV	aGwo0E	outcome	SMAD7	Weighted median	108	-0.853334	0.147424874417402	7.111740933514521e-09							0.425992238754616	0.319088461576619	0.56871184430339	1.9766038668828e-08
XKrbmw	aGwo0E	outcome	SMAD2	Weighted median	133	0.518860441464486	0.064507861753234	8.74026741371405e-16							1.68011197245419	1.48056686661748	1.90655099991048	3.5976956427238405e-15
QPfw1O	aGwo0E	outcome	SLX4IP	Weighted median	441	-0.186526	0.0365250298162437	3.27643161417283e-07							0.829836668984814	0.772506048589508	0.891422013392846	8.09935206579836e-07
yl2owW	aGwo0E	outcome	SLX4	Weighted median	164	0.671439953084117	0.229163597313211	0.0033900668887767							1.95705335768693	1.24892015548948	3.06669551932452	0.005694450188917
7o72nL	aGwo0E	outcome	SLU7	Weighted median	80	0.225415992585548	0.152688553284327	0.139860067870437							1.25284378152866	0.92880768747417	1.6899273790288	0.182126283225346
tGOcHH	aGwo0E	outcome	SLTM	Weighted median	33	-1.85666	0.476016943313199	9.60316004123392e-05							0.156193566464702	0.0614425652360995	0.397060736497858	0.000191377537522
R8lWfM	aGwo0E	outcome	SLPI	Weighted median	584	-0.248072	0.0427744877996882	6.650268336397291e-09							0.780303955950526	0.717552083184901	0.848543649918085	1.85251314701458e-08
Poougi	aGwo0E	outcome	SLMO2	Weighted median	25	-0.11241	0.305288983180109	0.712717859897584							0.893677807639197	0.491262647816467	1.62572918461567	0.763154025586726
KON0L5	aGwo0E	outcome	SLMO1	Weighted median	623	0.173682261818473	0.0457788099940821	0.0001482728631439							1.18967749979515	1.08758081539886	1.30135851375769	0.0002897252801446
HF1T5l	aGwo0E	outcome	SLFNL1	Weighted median	233	0.290919339245348	0.124357667668201	0.0193159841360786							1.33765668320088	1.04830891702374	1.70686843644532	0.0292450985067328
kjDB9c	aGwo0E	outcome	SLFN12L	Weighted median	674	0.0705207567596195	0.0249238218866791	0.0046627799250139							1.07306684259006	1.02190656698115	1.12678838347014	0.0076928705795974
SS2VEw	aGwo0E	outcome	SLFN12	Weighted median	406	0.0391188270758726	0.040128281107609	0.329637486869831							1.03989404387731	0.961238613356828	1.12498562528104	0.393122046199885
Q8mGm8	aGwo0E	outcome	SLFN11	Weighted median	769	0.468566792040083	0.0436067995793099	6.23798117235779e-27							1.59770271128114	1.46682098661057	1.74026277026046	4.09154253661699e-26
K1U1Jb	aGwo0E	outcome	SLCO5A1	Weighted median	45	-0.170818	0.196364608048971	0.384354868138561							0.842975284556625	0.573674984787212	1.2386932482979	0.449799444525627
MbNifF	aGwo0E	outcome	SLCO3A1	Weighted median	974	-0.0443671	0.0198309510794934	0.0252689160306334							0.956602699329913	0.920134163150364	0.994516627045111	0.0375808374574442
ntLIhy	aGwo0E	outcome	SLC9B2	Weighted median	427	0.810869695818909	0.0699654432864805	4.65440633580687e-31							2.24986383322628	1.96155480568358	2.5805484778671	3.53430120208833e-30
JINqdq	aGwo0E	outcome	SLC9A8	Weighted median	213	0.28520601963841	0.134431819687668	0.0338741740266162							1.33003601343589	1.02195724171147	1.73098807350677	0.0493377110008232
Omufto	aGwo0E	outcome	SLC9A5	Weighted median	69	-2.23416	0.505229363271574	9.77600844892478e-06							0.107082120125139	0.0397792916226978	0.288255018698018	2.13625329707285e-05
yBO04Q	aGwo0E	outcome	SLC9A3R2	Weighted median	6	4.56510831538391	1.39832425910084	0.00109580317681							96.0729996368127	6.19902962401608	1488.94614464437	0.0019518302691067
YsU9Dz	aGwo0E	outcome	SLC8A1-AS1	Weighted median	444	-0.0931685	0.0196849703317831	2.21252924387741e-06							0.911040005102026	0.876559221389318	0.946877142631374	5.11682343578671e-06
4zIKf8	aGwo0E	outcome	SLC6A9	Weighted median	45	-0.609263	0.24091434473535	0.0114401085645443							0.543751615513823	0.339101827294614	0.871908658625468	0.0178953097636574
FkIcWv	aGwo0E	outcome	SLC6A6	Weighted median	171	0.114521240912115	0.05841689458674	0.0499475349220103							1.12133645902018	1.00002412781318	1.25736511685729	0.0707198804239388
Ir26TZ	aGwo0E	outcome	SLC6A20	Weighted median	295	-0.602642	0.0775710061140349	7.91624888427649e-15							0.547363369949309	0.470160302621081	0.637243631782599	3.10885991873332e-14
emQ3u5	aGwo0E	outcome	SLC6A19	Weighted median	70	-0.715573	0.158751451713204	6.55940064794892e-06							0.488911808232742	0.358177715983278	0.667363561614115	1.4560955749747e-05
wwqB7v	aGwo0E	outcome	SLC6A16	Weighted median	348	-0.0871907	0.0357283766207907	0.0146719027266952							0.916502262980522	0.854517445393112	0.982983323016882	0.0226023978735243
nP53gZ	aGwo0E	outcome	SLC5A9	Weighted median	54	0.598142191433609	0.280844943786836	0.0331885315588508							1.81873679500618	1.04884137402955	3.15376911267441	0.0484061473961356
aUqEVx	aGwo0E	outcome	SLC5A5	Weighted median	7	-0.00145634	0.782002265054336	0.998514082020166							0.998544719077056	0.215632269017505	4.62403684077421	0.998797124745232
P9SFB9	aGwo0E	outcome	SLC5A2	Weighted median	32	1.23144	0.281878675655169	1.25002673875583e-05							3.42614698234565	1.97181432629521	5.95313817741215	2.70333877494109e-05
qUp5OZ	aGwo0E	outcome	SLC5A10	Weighted median	103	0.74978366205836	0.176300328431303	2.11041238721668e-05							2.11654207872308	1.49815599971273	2.99017617114935	4.47325649015624e-05
lRBe0k	aGwo0E	outcome	SLC52A1	Weighted median	8	1.33091312277985	0.996920037789855	0.181868180932513							3.78449752120163	0.53630612549537	26.705683204256	0.231418769931975
GgmBVq	aGwo0E	outcome	SLC50A1	Weighted median	14	-0.36823	0.408175680620529	0.366984443668708							0.691957932142144	0.310909175101157	1.54001817314863	0.431813758647291
IVcMCf	aGwo0E	outcome	SLC4A5	Weighted median	13	0.173294061473611	0.539456670006179	0.748029925107417							1.18921575620976	0.413110151165304	3.42338262767999	0.794695333320754
7UI5me	aGwo0E	outcome	SLC4A2	Weighted median	146	-0.00450159	0.0548257710719231	0.934561457824771							0.995508525744768	0.894079928314557	1.1084436563728	0.950081070477348
FMxT0a	aGwo0E	outcome	SLC4A11	Weighted median	291	-0.123122	0.0655309507467412	0.0602666747031035							0.884155777850382	0.777584720147428	1.00533282001477	0.0841536045889605
CzQkCz	aGwo0E	outcome	SLC4A10	Weighted median	9	7.56135857996895	2.30549807397209	0.0010391488119318							1922.45554960152	20.9592977580901	176333.929831554	0.0018552661181696
fR3f92	aGwo0E	outcome	SLC4A1	Weighted median	222	-0.194447	0.0599259181051581	0.0011753848962604							0.82328994114964	0.732053528037344	0.925897220952403	0.0020854597051412
4IAEIM	aGwo0E	outcome	SLC47A1	Weighted median	924	-0.265358	0.026229517655311	4.65549927738629e-24							0.766931445714179	0.728499954366811	0.807390362757773	2.7478569988138e-23
cxRaoR	aGwo0E	outcome	SLC46A3	Weighted median	525	-0.115434	0.0318066712568428	0.0002842431289657							0.890978982381413	0.837130324551707	0.948291471188229	0.0005401362912644
IsOyWl	aGwo0E	outcome	SLC46A1	Weighted median	72	-1.45388	0.176234248626108	1.58797383534114e-16							0.233662140107469	0.16541493900994	0.330066897502659	6.77116100356969e-16
QKa1xd	aGwo0E	outcome	SLC45A1	Weighted median	19	-1.1135	0.328737953247077	0.0007061227589681							0.328408127702266	0.172419547833255	0.625520132121043	0.0012851200096262
oHW2jX	aGwo0E	outcome	SLC44A5	Weighted median	1492	0.0350893605435564	0.0166071078556065	0.0346082847579097							1.03571225647471	1.00254265622783	1.06997928870985	0.0503120116497959
HeJdIC	aGwo0E	outcome	SLC44A1	Weighted median	295	-0.324064	0.102553736271642	0.0015780176549335							0.723204224838985	0.591514577352936	0.884212107105667	0.0027576514399251
CV76De	aGwo0E	outcome	SLC43A2	Weighted median	61	0.252908060770051	0.132503545478752	0.0563022219932014							1.28776487528085	0.993224171782492	1.66965164674855	0.079020893207253
O1JmcJ	aGwo0E	outcome	SLC43A1	Weighted median	131	0.797038710452771	0.10288149532016	9.3975517644553e-15							2.21896020592546	1.81373994171221	2.71471354974551	3.67794700007435e-14
hqPRmE	aGwo0E	outcome	SLC41A2	Weighted median	428	-0.551656	0.055577829207322	3.2140806258302904e-23							0.575995031205713	0.516547107192716	0.642284646170502	1.83566734286582e-22
31tE9r	aGwo0E	outcome	SLC3A2	Weighted median	15	-1.3901	0.412963339773128	0.0007622269056958							0.249050307401113	0.110857630267147	0.559510928270042	0.001381324816481
2ywuRX	aGwo0E	outcome	SLC3A1	Weighted median	349	0.0169247970284559	0.0833653444628436	0.839119730054658							1.01706883285066	0.863750540518974	1.19760157850053	0.872659179650487
FOARZQ	aGwo0E	outcome	SLC39A9	Weighted median	394	0.665822180670641	0.0682052632475975	1.63833863194937e-22							1.94608990125725	1.70257168640184	2.2244384386418	9.104481826118649e-22
q8APpt	aGwo0E	outcome	SLC39A8	Weighted median	277	-0.0506235	0.0495967024342394	0.307394889845462							0.950636486848542	0.862575093151684	1.04768818077712	0.369279003575415
ieub3a	aGwo0E	outcome	SLC39A4	Weighted median	95	-0.189305	0.0946981331885717	0.0456042051639186							0.827533905257888	0.687348704048249	0.996309966568729	0.0650794230830778
ZKfRRT	aGwo0E	outcome	SLC39A14	Weighted median	134	-0.23579	0.113810282181192	0.0382862145948231							0.789946893561493	0.632005165129334	0.987359169002605	0.0552475131331945
UFPBvO	aGwo0E	outcome	SLC38A9	Weighted median	363	0.824839158482402	0.115451468940556	9.03460515371064e-13							2.28151377367857	1.81948642892565	2.86086503132569	3.17681930374911e-12
1y3srI	aGwo0E	outcome	SLC38A6	Weighted median	322	0.0237809288588747	0.0739200076504937	0.747671138666769							1.02407	0.885943335237588	1.18372251167404	0.794416665165915
ViWMkF	aGwo0E	outcome	SLC38A2	Weighted median	166	2.6450940392855	0.22979190469095	1.16362003473273e-30							14.0847695425121	8.97732457214541	22.0979793558102	8.708729067702029e-30
9HKeco	aGwo0E	outcome	SLC38A11	Weighted median	276	-0.249832	0.071444395304601	0.0004707520966249							0.778931846543824	0.677149813617568	0.8960126833954	0.0008736829268403
2fg1Y4	aGwo0E	outcome	SLC38A10	Weighted median	482	0.113833312656466	0.0352682805839097	0.0012481595286468							1.1205653252587	1.04572	1.20076534692961	0.0022087121281516
ErKspD	aGwo0E	outcome	SLC37A4	Weighted median	487	0.233042170525456	0.0507745214226599	4.43785120090255e-06							1.26243471574007	1.14284881821606	1.39453389293736	9.99923209332247e-06
zmdgSO	aGwo0E	outcome	SLC35F6	Weighted median	447	-0.529619	0.0298586572794529	2.1519860500553498e-70							0.588829418428556	0.555358339003501	0.624317777651532	4.5298068526154497e-69
AH10jW	aGwo0E	outcome	SLC35F3	Weighted median	519	0.0878695040126966	0.0323247897350713	0.0065612004759437							1.09184563125753	1.02481582767818	1.16325963192531	0.0106154572494857
Ws8Ji4	aGwo0E	outcome	SLC35F2	Weighted median	480	0.181865213277713	0.0649432996895805	0.0051044196224453							1.19945251271115	1.05609310169967	1.36227225415418	0.008375913993678
Lq3X4S	aGwo0E	outcome	SLC35E4	Weighted median	169	0.349545192415255	0.0900154187117091	0.0001031033403873							1.41842229265366	1.18900279894694	1.69211	0.0002047437223714
ayIFMR	aGwo0E	outcome	SLC35E2	Weighted median	162	-0.200028	0.0626502360233346	0.0014091450759154							0.818707931341501	0.724102488780321	0.925673764732537	0.0024761157455256
wtXjbZ	aGwo0E	outcome	SLC35D3	Weighted median	509	0.336713817230708	0.0377370629556565	4.55347515157468e-19							1.40033825370942	1.30050047849442	1.50784044852649	2.17937737757454e-18
8CmcgU	aGwo0E	outcome	SLC35B3	Weighted median	1060	-0.305243	0.0302973865151263	7.13339815806706e-24							0.736944192805272	0.694456336385752	0.782031518548553	4.18242664613087e-23
kglypF	aGwo0E	outcome	SLC30A6	Weighted median	195	-1.00025	0.107362770767921	1.20230493706452e-20							0.367788850593819	0.297995375292215	0.453928650699621	6.1660407770994e-20
dZqJt5	aGwo0E	outcome	SLC30A5	Weighted median	29	-1.42638	0.321721331691062	9.26768995375959e-06							0.240176694433684	0.127842759729068	0.451217141051557	2.03065457393704e-05
h7eGaE	aGwo0E	outcome	SLC30A4	Weighted median	256	-0.267352	0.0830006707432399	0.0012770541571306							0.765403315759377	0.650487180354484	0.900620724694671	0.0022563680313552
KdwQm0	aGwo0E	outcome	SLC30A1	Weighted median	27	-0.2303	0.358651950689651	0.520790444402213							0.794295074133039	0.39327031456531	1.60425193925293	0.585699561209309
lv4n7b	aGwo0E	outcome	SLC2A5	Weighted median	467	0.457427833802917	0.0349774415948188	4.41045548475717e-39							1.58000471909423	1.47531577006123	1.69212243441039	4.32492521463792e-38
Na4KhS	aGwo0E	outcome	SLC2A4	Weighted median	34	-0.133978	0.268490259705452	0.617774591650905							0.874608898175159	0.516737962622845	1.48032616160907	0.677027827412366
sZ0enz	aGwo0E	outcome	SLC2A13	Weighted median	34	-0.129095	0.286136067252158	0.651870807866836							0.878890898176373	0.501615594212797	1.53992264157876	0.708426791637416
4KyfUe	aGwo0E	outcome	SLC2A12	Weighted median	16	0.792321955761334	0.323293755326573	0.0142546942073187							2.20851855966465	1.17194668009598	4.16192503568827	0.0219905276643819
SQTUmW	aGwo0E	outcome	SLC2A11	Weighted median	62	-0.0450522	0.0995532824002895	0.650877390297064							0.955947575494608	0.786488924739246	1.16191816356091	0.707518388330528
DTnkLR	aGwo0E	outcome	SLC29A2	Weighted median	150	1.50034801659364	0.146268343327982	1.0950126942814001e-24							4.48324904393469	3.36578784064525	5.97171388737566	6.61493178473761e-24
KoIatL	aGwo0E	outcome	SLC28A3	Weighted median	207	-0.0918979	0.0782757243085646	0.240383515952763							0.912198234960842	0.782455388826925	1.06345439209408	0.297040191060889
xjMEXB	aGwo0E	outcome	SLC27A4	Weighted median	44	-2.71511	0.417139469982946	7.57147612851081e-11							0.0661977080277149	0.0292258174896574	0.149940597886556	2.3806875965938103e-10
GqDGwn	aGwo0E	outcome	SLC27A1	Weighted median	330	-0.361497	0.0620979575352296	5.8354216304518405e-09							0.69663234127958	0.616800595316015	0.786796612393068	1.63196906203913e-08
Jsm0wh	aGwo0E	outcome	SLC26A2	Weighted median	46	1.22775880438194	0.227481819916716	6.76989919510606e-08							3.41357047757492	2.18560884503367	5.33144960126273	1.7600027886956e-07
gZb6aC	aGwo0E	outcome	SLC26A11	Weighted median	144	-0.386427	0.0959584389965488	5.64874406765594e-05							0.679480415232404	0.562983246653587	0.820084145360878	0.000115045101692
TVI9F1	aGwo0E	outcome	SLC25A45	Weighted median	253	0.0490535001571035	0.0979822454947729	0.616626885502022							1.05027653919682	0.866761262106389	1.27264664102149	0.675968979373728
oMt7cr	aGwo0E	outcome	SLC25A42	Weighted median	239	0.490407292107755	0.115845245764596	2.30290401807916e-05							1.63298118487742	1.30128288230302	2.04922971509794	4.86343637862458e-05
BaEnSA	aGwo0E	outcome	SLC25A35	Weighted median	79	0.4651099554879	0.222226259361164	0.0363530131746494							1.59218924920823	1.02998731552353	2.46126002435837	0.0526732728140311
luFWut	aGwo0E	outcome	SLC25A25	Weighted median	178	1.08448387412657	0.0661000682602633	1.7126977181203202e-60							2.95791276938691	2.59848281064179	3.36706016121046	2.89273180746319e-59
MfOPsU	aGwo0E	outcome	SLC25A19	Weighted median	172	-0.136184	0.168239965789808	0.418247815137657							0.872681749127466	0.627548279752544	1.21356947318934	0.484312226027697
bPSY2e	aGwo0E	outcome	SLC25A11	Weighted median	703	0.0626135290778637	0.0344189589627252	0.0688873083785592							1.06461531685249	0.995164100308423	1.13891344404973	0.0952248159105168
KddIJd	aGwo0E	outcome	SLC23A2	Weighted median	236	-0.54636	0.0554231770533114	6.331417764035181e-23							0.579053605479301	0.519447438916392	0.645499530651353	3.57475464910434e-22
400ZN9	aGwo0E	outcome	SLC22A17	Weighted median	167	-0.1645	0.103207840909632	0.110965295550811							0.848317912490122	0.692957101140154	1.0385105794681	0.147564427889548
UU1I7N	aGwo0E	outcome	SLC22A16	Weighted median	1663	0.102109904532518	0.0188122247963551	5.70374489892787e-08							1.10751	1.0674129786104	1.14910326098027	1.49138408617409e-07
j6HFKb	aGwo0E	outcome	SLC22A15	Weighted median	1056	-0.168783	0.010801576273522	4.86292716065733e-55							0.844692559430668	0.826997470740211	0.862766266163913	7.18001167118811e-54
UfVa8W	aGwo0E	outcome	SLC22A14	Weighted median	10	-0.580502	0.349775386275655	0.0969861699013395							0.559617097037497	0.281939649021201	1.11077422556175	0.130442332343349
F19v0o	aGwo0E	outcome	SLC22A1	Weighted median	312	-0.096058	0.057853512732479	0.096840747988758							0.908411296132391	0.811029444927103	1.01748597181339	0.130260930976057
opedFE	aGwo0E	outcome	SLC19A1	Weighted median	263	-0.195641	0.0779466832454809	0.0120752966906151							0.822307222251009	0.705804703836671	0.958040041516423	0.018823547974456
rHyfDa	aGwo0E	outcome	SLC18A1	Weighted median	446	0.0736569641505928	0.0251539528496088	0.0034088012257788							1.07643748550767	1.02465422740879	1.13083772965667	0.0057233893065915
QtKdBK	aGwo0E	outcome	SLC16A4	Weighted median	300	0.317070812241339	0.057827280346377	4.18016259576069e-08							1.3730998007574	1.22596629189796	1.5378914373911	1.10375506530393e-07
1pcP7Q	aGwo0E	outcome	SLC16A3	Weighted median	1022	-0.011986	0.0128309448724278	0.35022881545345							0.988085575478903	0.963546411997311	1.01324969125846	0.414417718613848
aIJ5Li	aGwo0E	outcome	SLC16A14	Weighted median	6	-0.572164	0.732786886870896	0.434916685083194							0.564302796825205	0.134199658921994	2.37286479759122	0.501252513546367
W1DTnu	aGwo0E	outcome	SLC16A13	Weighted median	15	-0.43006	0.522265089693486	0.410250945929582							0.650469880144152	0.233704014279314	1.81045698457307	0.476118912452831
EPeWGN	aGwo0E	outcome	SLC16A11	Weighted median	47	-0.0701142	0.183791156448984	0.702840918278175							0.932287361526538	0.650284804920077	1.3365831676921	0.754278356990413
bYKepI	aGwo0E	outcome	SLC14A1	Weighted median	837	0.0523064064089061	0.0455373491049757	0.250700961728494							1.05369855304494	0.963727406367886	1.15206917781185	0.308163011924879
3yCUK1	aGwo0E	outcome	SLC12A9	Weighted median	449	-0.128893	0.0587747845478537	0.0283078077796177							0.879068238092093	0.78341608119748	0.986399163572369	0.0417547137532157
uLW1hX	aGwo0E	outcome	SLC12A8	Weighted median	12	1.76667976455623	0.753777580238106	0.019090042305396							5.85139307021868	1.33545987379811	25.6382101281908	0.0289296122703522
hjEexV	aGwo0E	outcome	SLC12A3	Weighted median	202	0.140234343009796	0.0807571497653449	0.0824764434476392							1.1505433890684	0.982112249110558	1.34786027903413	0.112439531310881
5SwMw2	aGwo0E	outcome	SLC12A1	Weighted median	735	-0.00249041	0.004521603612878	0.581784227099469							0.997512687888734	0.988711445639829	1.00639227641902	0.643628765930559
jfguDl	aGwo0E	outcome	SLAMF7	Weighted median	309	0.550941806555365	0.051019238817024	3.49085052366575e-27							1.73488617586046	1.56979352578677	1.91734135333705	2.30806328186107e-26
guJFpd	aGwo0E	outcome	SLAMF1	Weighted median	167	0.41942544297071	0.0625445310666666	1.99991909945774e-11							1.5210873530722	1.34559751312291	1.71946418829689	6.512557067464949e-11
8KYYmR	aGwo0E	outcome	SLA2	Weighted median	33	-0.671593	0.391633389371363	0.0863723392400142							0.510893893112832	0.237118609958031	1.10076796615071	0.117329868991268
uZWJ2h	aGwo0E	outcome	SKIV2L2	Weighted median	14	-1.21464	0.318855684748532	0.0001393180246932							0.296816506631226	0.158881236516547	0.554502473296079	0.0002730699612744
ABpP6C	aGwo0E	outcome	SKI	Weighted median	74	-1.64438	0.151171090148348	1.47423030256576e-27							0.193133077623268	0.143607536232902	0.259738358102195	9.87544401866524e-27
yHNpQc	aGwo0E	outcome	SKAP2	Weighted median	2039	-0.0354488	0.0051226925712873	4.51772333072322e-12							0.965172124830437	0.955529823544078	0.974911727081985	1.5248280775276297e-11
tXxZNF	aGwo0E	outcome	SKA1	Weighted median	53	1.54108312083463	0.23578520451039	6.32019910704158e-11							4.66964532301755	2.94157196371266	7.41290293481655	1.99461349485866e-10
Hn03X2	aGwo0E	outcome	SIRT6	Weighted median	50	-0.465418	0.151885707076432	0.0021820399584314							0.627872363652665	0.466212210287017	0.845588546031614	0.0037462839293271
0e3Pit	aGwo0E	outcome	SIRT5	Weighted median	396	-0.0639949	0.0349163973682398	0.0668318747302604							0.938009804558995	0.87596335925872	1.00445113845102	0.0926141685076873
r1wv7E	aGwo0E	outcome	SIRT3	Weighted median	161	0.197774719607432	0.0392266723777736	4.61069751070725e-07							1.21868781642465	1.12850126896685	1.31608181111005	1.12629692010221e-06
pjjItb	aGwo0E	outcome	SIRPB1	Weighted median	1457	-0.0283175	0.012456498866275	0.0230076202577658							0.972079721707521	0.948634025083568	0.996104883832023	0.0344406709570161
tsmQCq	aGwo0E	outcome	SIRPA	Weighted median	367	0.352651893455269	0.0408134882231556	5.5932159812727005e-18							1.42283575877558	1.31345025396112	1.54133100233152	2.5568765533711e-17
3THq5a	aGwo0E	outcome	SIPA1L1	Weighted median	457	0.861741049501604	0.0590850123433342	3.51126424809197e-48							2.36727865720271	2.10841066707567	2.65793013114478	4.391569307556651e-47
jzNdq1	aGwo0E	outcome	SIPA1	Weighted median	388	-0.00935563	0.0692952828910627	0.892603077258157							0.99068799358479	0.864871456179384	1.13480759900289	0.916364029462298
gur0xI	aGwo0E	outcome	SIN3A	Weighted median	130	1.87596640837982	0.158185282554275	1.92582915460434e-32							6.52712394059618	4.78709260140427	8.89962874823151	1.53479170390254e-31
7OAAXu	aGwo0E	outcome	SIMC1	Weighted median	323	0.21940612519566	0.0512218473065159	1.84019027340204e-05							1.24533693670703	1.12638265138078	1.3768536687117	3.92077112506496e-05
lZw9HM	aGwo0E	outcome	SIM2	Weighted median	181	-0.385509	0.0799317729749899	1.41433356455183e-06							0.680104463930507	0.581482068449798	0.795453732720111	3.32677813119812e-06
uGScm8	aGwo0E	outcome	SIL1	Weighted median	619	-0.071961	0.0213925486640044	0.0007686767278321							0.930567197053018	0.892355766260519	0.970414873722349	0.0013922472644483
SwosJi	aGwo0E	outcome	SIK3	Weighted median	560	-0.408012	0.0678019854283334	1.7691343731052702e-09							0.664970925684545	0.582221772459543	0.759480927925083	5.1219260099929505e-09
eegvOJ	aGwo0E	outcome	SIK2	Weighted median	538	-0.122956	0.0243404090381357	4.38320780938639e-07							0.884302634813478	0.843105542963109	0.927512760964348	1.07258217547732e-06
jT0XvW	aGwo0E	outcome	SIGMAR1	Weighted median	837	0.380605994349583	0.0445031434621657	1.20618317277567e-17							1.46317099418391	1.34095203176483	1.59652941157301	5.4132510251305103e-17
sykfAH	aGwo0E	outcome	SIGLEC9	Weighted median	39	0.243418271692904	0.202063581144531	0.228333899453509							1.27560206078339	0.85845042416758	1.89546253536149	0.283804554675867
7VOVnx	aGwo0E	outcome	SIGLEC7	Weighted median	110	-0.101493	0.150382837207319	0.49974016450638							0.903487348024008	0.672842816373148	1.21319477324516	0.565255474210882
zrQGWA	aGwo0E	outcome	SIGLEC20P	Weighted median	32	4.60450822207389	0.448741455294855	1.05675270368032e-24							99.9338255135571	41.4701947202578	240.818003125884	6.38849165686719e-24
wQyM9P	aGwo0E	outcome	SIGLEC18P	Weighted median	67	-0.0786744	0.0458167032472098	0.0859506993291778							0.924340822204367	0.844952253026265	1.0111884458954	0.1167891752988
K7RPg3	aGwo0E	outcome	SIGLEC17P	Weighted median	87	0.668754678607545	0.157925975040152	2.2895020822434e-05							1.95180518180619	1.43221152057455	2.6599028237095	4.83575337191409e-05
NbawQs	aGwo0E	outcome	SIAH3	Weighted median	52	0.268312953797884	0.182478667128189	0.14145890768144							1.30775634329508	0.914529792497321	1.87006116964038	0.184086990390279
ZDnnFM	aGwo0E	outcome	SIAE	Weighted median	89	-0.165825	0.25820494783833	0.520729614613784							0.847194756724041	0.510734000424658	1.40530874236674	0.585644481771229
mHKgNZ	aGwo0E	outcome	SHISA7	Weighted median	45	-1.05389	0.237300299607274	8.94659032269944e-06							0.348577768064108	0.218930158699396	0.555001015439772	1.96299698753029e-05
ZdIE7T	aGwo0E	outcome	SHISA4	Weighted median	160	0.680220710842628	0.107415453932198	2.41040559407825e-10							1.97431343652854	1.59949254751193	2.43696886973338	7.368434352097501e-10
ygFpBj	aGwo0E	outcome	SHANK1	Weighted median	6	-0.204349	0.550489408587266	0.710478571866379							0.815177774869335	0.277118989046796	2.39794034658774	0.761130898898885
ccOdAq	aGwo0E	outcome	SH3TC2	Weighted median	103	-1.18229	0.155040835392495	2.42754260833164e-14							0.306575398396279	0.226237127466261	0.415442310262951	9.296735463519999e-14
1LBoIn	aGwo0E	outcome	SH3RF3-AS1	Weighted median	65	0.169110211835472	0.148141923282013	0.253644488133172							1.18425065016971	0.885814287799738	1.5832320857128	0.311331924948274
7FQTwq	aGwo0E	outcome	SH3PXD2B	Weighted median	451	0.271240571552985	0.0306288624972794	8.314678232216181e-19							1.31159056381251	1.23516924485392	1.39274015625726	3.9308138632169895e-18
VgSj6R	aGwo0E	outcome	SH3GLB2	Weighted median	858	-0.0419773	0.0183106939591929	0.0218768083409069							0.958891580101756	0.925088171187465	0.993930190686349	0.0328614418944275
tnnjgH	aGwo0E	outcome	SH3GL1P3	Weighted median	625	-0.226146	0.0135929272076042	3.75984913314346e-62							0.79760201098558	0.776632761807311	0.819137434336153	6.60084672084884e-61
EfohZp	aGwo0E	outcome	SH3GL1P1	Weighted median	27	-0.602581	0.263182016983164	0.0220445903388195							0.547396867795768	0.326796391609119	0.916911381417641	0.0330883179348818
2C36tp	aGwo0E	outcome	SH3D19	Weighted median	218	-1.32979	0.0955588664930353	5.066754062246581e-44							0.264531654066849	0.219349322935647	0.31902079781606	5.678603696396729e-43
5fMNP3	aGwo0E	outcome	SH3BP4	Weighted median	115	0.472804122215113	0.163858233583902	0.0039085922362142							1.60448706882076	1.16374352349502	2.21215302344414	0.006509006345503
ReJuWu	aGwo0E	outcome	SH3BP2	Weighted median	178	0.817798275892488	0.140797750213813	6.3103123405679906e-09							2.26550632249244	1.71915808491454	2.98548396583806	1.76129017266147e-08
z0bl8z	aGwo0E	outcome	SH3BP1	Weighted median	896	0.147585164796249	0.0428169160372688	0.0005670811351906							1.15903198934984	1.06573426186625	1.26049729318436	0.0010422824257534
Eb2EA6	aGwo0E	outcome	SH3BGRL3	Weighted median	666	0.946819467984356	0.0594127900496051	3.54800945741041e-57							2.57749879134707	2.29416834168565	2.89582063298557	5.53115529266162e-56
Nn6goF	aGwo0E	outcome	SH3BGRL2	Weighted median	593	-0.162922	0.0429307815460296	0.0001476540925512							0.849657842591216	0.78108923329002	0.924245807916174	0.0002886075226235
pi8SPT	aGwo0E	outcome	SH3BGR	Weighted median	84	3.9512575583236	0.402640117677335	9.8616168755498e-23							52.000719671573	23.6197429427376	114.483669569018	5.52185717446205e-22
FiRqFW	aGwo0E	outcome	SH2D3A	Weighted median	30	-0.760082	0.332528466380946	0.0222679587978492							0.46762797589308	0.243694955889988	0.897334633124605	0.0334053190966278
VDN1uB	aGwo0E	outcome	SH2D2A	Weighted median	44	-0.92589	0.327471799977173	0.0046929258820065							0.396178577334341	0.208516950337048	0.752732403216888	0.0077402803508419
07bzsz	aGwo0E	outcome	SH2B2	Weighted median	124	-0.0815539	0.131935088820036	0.536485486651731							0.921683057954551	0.711665953895459	1.19367753181184	0.600738740611879
AnaSei	aGwo0E	outcome	SGOL2	Weighted median	149	-0.177848	0.108466210974522	0.101074716951386							0.837069385581013	0.676757622275067	1.03535613521643	0.135505949567146
ki7ynY	aGwo0E	outcome	SGOL1	Weighted median	49	-1.37256	0.457414912944244	0.0026936144505729							0.253456244128025	0.103405481348039	0.62124431751609	0.0045781840147726
JISHCs	aGwo0E	outcome	SGK3	Weighted median	55	-1.11603	0.447366515511954	0.0126074293431041							0.327577091634262	0.136303640972137	0.787262542645484	0.0195998751286227
SIOlXR	aGwo0E	outcome	SGK2	Weighted median	27	-0.298986	0.374003102394971	0.424045876925765							0.74156961973844	0.356282147777025	1.54351124340695	0.490187389329237
03TJcY	aGwo0E	outcome	SFXN3	Weighted median	275	-0.226244	0.0907261239359186	0.0126418302890884							0.797523482263293	0.66759925520428	0.952732795615154	0.0196495020580326
xqkFAM	aGwo0E	outcome	SF3B5	Weighted median	159	-0.382947	0.101390169168218	0.0001587499246102							0.681848834373736	0.558962983168016	0.831750664957851	0.000309219040552
LKUMna	aGwo0E	outcome	SF3B3	Weighted median	708	0.0710440299843837	0.0276513619606342	0.0101910729155691							1.07362849667363	1.0169900776626	1.13342123407824	0.0160570746371507
sYAW2Y	aGwo0E	outcome	SF3B2	Weighted median	849	0.358946504345551	0.0367680971647469	1.63173993818236e-22							1.43182020336401	1.33226570959546	1.53881397681838	9.06985240391801e-22
NMyYGq	aGwo0E	outcome	SF3B14	Weighted median	33	0.313476213813048	0.251156453651487	0.211983002576294							1.36817291875793	0.836281136003392	2.23835867513218	0.265580892107632
2Tt8s4	aGwo0E	outcome	SF3A3	Weighted median	706	-0.0405636	0.023448032485349	0.0836416960955605							0.960248093280245	0.917115609485318	1.00540912302846	0.113889827247918
pz3eHY	aGwo0E	outcome	SF3A2	Weighted median	189	1.56720845385587	0.15588144344799	8.83479997767088e-24							4.79324892458418	3.5313520856233	6.50607322519984	5.16160860095641e-23
NhfDDo	aGwo0E	outcome	SETP9	Weighted median	18	0.161428442566706	0.140739501715876	0.251380933471308							1.17518836168675	0.891882411471576	1.54848628886544	0.308868191809666
jJiNMo	aGwo0E	outcome	SETP17	Weighted median	6	-0.0851024	0.223029497281701	0.702776744396602							0.918418191085173	0.59319015758831	1.42195881527348	0.754227839526048
RvxjrM	aGwo0E	outcome	SETMAR	Weighted median	271	0.67660985176178	0.0884536875986037	2.02057486018248e-14							1.96719732429887	1.65407282303354	2.33959790575083	7.77009884156574e-14
LAXm6T	aGwo0E	outcome	SETD7	Weighted median	15	-4.14964	0.592429128379098	2.47952682601155e-12							0.0157700616097102	0.0049379596329431	0.0503638874475425	8.508443688646849e-12
YI5IQR	aGwo0E	outcome	SETD5-AS1	Weighted median	173	-0.278453	0.0905354932669189	0.0021006444668212							0.756953924259254	0.633875662038764	0.903930025659266	0.0036157110512984
XqR2te	aGwo0E	outcome	SETD1B	Weighted median	37	2.13263182172597	0.304658573279701	2.55831761040809e-12							8.43704240904552	4.64365150067012	15.3292478132263	8.77211027949688e-12
sXGo6w	aGwo0E	outcome	SETD1A	Weighted median	450	0.685287941134734	0.0417132883346574	1.1952449271188701e-60							1.98434312729579	1.82856205557337	2.15339568862012	2.02916443761008e-59
rnqqNa	aGwo0E	outcome	SESN2	Weighted median	719	0.0742901507571142	0.0576447833041069	0.197482381729889							1.0771192871373	0.962045411124971	1.20595758298613	0.249143801031735
Qzb4e0	aGwo0E	outcome	SERTAD1	Weighted median	493	-0.239973	0.0604236009802405	7.14175122656306e-05							0.786648994094294	0.698791130735504	0.885553082590267	0.0001441156506191
eJH6rn	aGwo0E	outcome	SERPINI2	Weighted median	24	0.165025275520332	0.290437506184424	0.569902246648614							1.17942292886287	0.667489087870347	2.08398679529826	0.632566013417095
FhSLCu	aGwo0E	outcome	SERPINF1	Weighted median	263	0.124879881625808	0.0616883997767848	0.042932536498267							1.13301234929137	1.00397851141091	1.27862993984076	0.0614834942349735
AFpZpk	aGwo0E	outcome	SERPIND1	Weighted median	55	-0.507151	0.38043960133897	0.182510285838959							0.602208869083214	0.285700118817364	1.26935726699614	0.232181996479943
I0PngV	aGwo0E	outcome	SERPINB8	Weighted median	998	-0.00494424	0.0115668539533821	0.669052617745285							0.995067967121695	0.972762546491143	1.01788485048413	0.723847216623181
t43Rqp	aGwo0E	outcome	SERPINB2	Weighted median	1021	0.120836704146187	0.0326196616183173	0.0002118806670501							1.12844062764552	1.05855224438399	1.20294322446224	0.0004075668961677
ybjIoW	aGwo0E	outcome	SERP2	Weighted median	247	0.71771886074671	0.0866710833643369	1.22197048785052e-16							2.04975210356226	1.72951934968078	2.42927821931186	5.23991042542134e-16
uCpuR2	aGwo0E	outcome	SERP1	Weighted median	142	-0.0921126	0.0855656495039607	0.281697519822368							0.912002447801435	0.77118940204147	1.07853	0.341748994936016
SkG6WN	aGwo0E	outcome	SERINC5	Weighted median	511	0.0920159560244777	0.0689900956285717	0.182283825641396							1.09638231584432	0.957715391365428	1.25512672484293	0.231911818860237
wrq3r9	aGwo0E	outcome	SERINC1	Weighted median	1370	-0.172002	0.0181130628385531	2.18093912253528e-21							0.841977687397029	0.812610505072676	0.872406179404544	1.1556895363146e-20
pD1Ewb	aGwo0E	outcome	SERHL	Weighted median	145	0.5479993609595	0.124018898453287	9.93072775087298e-06							1.72978887062235	1.35651962445682	2.20576944334814	2.16929493755031e-05
AsNtKe	aGwo0E	outcome	SEPT7P8	Weighted median	4	1.18587807492761	0.494317271875873	0.0164389211140365							3.27355999080432	1.24236425567049	8.62564659638521	0.0251469108299826
GT6cBW	aGwo0E	outcome	SEPT5	Weighted median	40	1.2175127315892	0.351346101871908	0.0005296790695641							3.3787733573142	1.69702101860905	6.72714673236836	0.0009771007458152
DqVJLU	aGwo0E	outcome	SEPT3	Weighted median	14	-0.166836	0.919023990712544	0.855947166319645							0.846338736030701	0.13971891506903	5.12664484799466	0.886531317283163
0iCX6I	aGwo0E	outcome	SEPT11	Weighted median	287	-0.0558127	0.0278834502515864	0.0453233087385783							0.945716280789914	0.8954183569359	0.998839566805009	0.0647103468473494
BIioXX	aGwo0E	outcome	SEPT10	Weighted median	270	-0.406162	0.0447211526316516	1.0650037222586601e-19							0.666202262673683	0.610293423096794	0.727232898135202	5.24047598513393e-19
lwDglA	aGwo0E	outcome	SEPT1	Weighted median	72	-1.73123	0.164284132777526	5.77171855499018e-26							0.177067348304856	0.128320784645555	0.2443317808749	3.66739822215022e-25
5wWxhh	aGwo0E	outcome	SEPHS1	Weighted median	20	-0.673252	0.220212181365936	0.0022335085559118							0.510047367914541	0.331254752441931	0.785342144071291	0.0038303892521856
8ESiMy	aGwo0E	outcome	SEMA7A	Weighted median	58	1.12734930622086	0.234203695222038	1.48278475042851e-06							3.08746172841083	1.95093757279287	4.88607121895522	3.48132378221745e-06
ypcCI3	aGwo0E	outcome	SEMA5A	Weighted median	276	0.784291057867505	0.0654900993471277	4.7628775074909e-33							2.19085320190189	1.92693462515759	2.49091883534514	3.88605181672292e-32
9cdaDU	aGwo0E	outcome	SEMA4G	Weighted median	63	-0.105619	0.119514845031958	0.376839959041414							0.899767122699888	0.711863999354142	1.13726902305237	0.441997052438268
YBGHuu	aGwo0E	outcome	SEMA4B	Weighted median	540	-0.149993	0.0366543929981133	4.27482362849323e-05							0.860713589555165	0.801046654116154	0.924824889334742	8.80284738937314e-05
jNhqIP	aGwo0E	outcome	SEMA3C	Weighted median	351	0.247560764846829	0.0607188302683613	4.55879001036992e-05							1.28089719354077	1.13718039111802	1.4427769184514	9.36301250861832e-05
wOVBqd	aGwo0E	outcome	SEMA3B	Weighted median	5	-0.569266	0.653846091878155	0.383949610354473							0.565940729658146	0.15711075692021	2.03861858834183	0.449431645547733
vXkEXp	aGwo0E	outcome	SELT	Weighted median	234	-0.107071	0.0346811303348772	0.0020198745300317							0.898462006595543	0.83941851199954	0.961658535946289	0.0034845780426426
43LrL8	aGwo0E	outcome	SELPLG	Weighted median	341	0.146797263387654	0.0795987546304728	0.0651517287754758							1.15811914607529	0.990826044192908	1.35365835846462	0.0904482340441419
cDVcCJ	aGwo0E	outcome	SELK	Weighted median	226	0.210004911427177	0.0760196879262111	0.0057359351694336							1.23368411909157	1.06290563501585	1.43190181287923	0.0093599473220654
hFdOND	aGwo0E	outcome	SEL1L3	Weighted median	338	-0.398639	0.0478986013342228	8.60799767088763e-17							0.671232826900403	0.611084228457343	0.737301810334902	3.71959161143061e-16
BlmaAL	aGwo0E	outcome	SECISBP2L	Weighted median	535	0.307376670454113	0.0602747013689774	3.40377875417023e-07							1.3598530880959	1.20832880950177	1.53037849189944	8.4028024081687e-07
yWT7QG	aGwo0E	outcome	SEC62	Weighted median	290	-1.4234	0.0853707375814426	2.0528427034022197e-62							0.240892657342278	0.203776699370231	0.284768928639843	3.6310987495947004e-61
ZCcYIT	aGwo0E	outcome	SEC61G	Weighted median	25	-1.23218	0.610943756280956	0.0437112187265653							0.291655599862429	0.0880692900276824	0.965864365482859	0.0625370055529381
9EkrzV	aGwo0E	outcome	SEC31A	Weighted median	54	1.44245712522197	0.248969557745233	6.884878126053441e-09							4.23108	2.5973112934151	6.8925247750449	1.91581409294479e-08
cWo5gX	aGwo0E	outcome	SEC24C	Weighted median	10	2.46009784293609	0.643750571915555	0.0001326382086904							11.7059568291366	3.31463238139475	41.3407610613971	0.0002605457425023
MCr41c	aGwo0E	outcome	SEC24B-AS1	Weighted median	7	0.0001106542335895	0.482858630905038	0.999817152892907							1.00011	0.38817761932625	2.57671046232331	0.999847587609917
igHrpI	aGwo0E	outcome	SEC24B	Weighted median	237	0.040568696340125	0.126966242284928	0.749329584780581							1.04140284780953	0.811975478199363	1.33565596565899	0.79583945029647
QAl3LP	aGwo0E	outcome	SEC24A	Weighted median	56	2.00819931569662	0.262232917992052	1.88740872610755e-14							7.44989036143015	4.45587208704091	12.4556686801544	7.27272859339298e-14
5xDvOA	aGwo0E	outcome	SEC22C	Weighted median	322	-0.153748	0.0707295541781262	0.0297238753606204							0.857487732568008	0.746486062770753	0.984995230554534	0.0437181402971428
adALZ1	aGwo0E	outcome	SEC22B	Weighted median	3	0.117641470136598	0.236145808690796	0.618362098717182							1.12484075006266	0.708075668280144	1.78690889926319	0.67749534858231
aZDCSK	aGwo0E	outcome	SEC14L5	Weighted median	761	0.0509898019387257	0.0203825802497169	0.0123620859319605							1.05231216168458	1.0111011097173	1.09520291787523	0.0192444975987598
OqXPfi	aGwo0E	outcome	SEC14L1P1	Weighted median	37	-0.34957	0.4386082809572	0.425452253606246							0.704991257585388	0.298423366572268	1.66546165261984	0.491502611657221
aPYZvk	aGwo0E	outcome	SEC14L1	Weighted median	296	-0.304958	0.0669611400524859	5.25725535427118e-06							0.737154452662146	0.646487333209129	0.840537252883572	1.17676673583915e-05
AoDjzh	aGwo0E	outcome	SEC13	Weighted median	1148	-0.270996	0.0241482022015342	3.17221095190931e-29							0.762619290725821	0.727365037799642	0.799582262499889	2.2610985089767097e-28
S81M0v	aGwo0E	outcome	SDSL	Weighted median	370	0.607602255337433	0.0519676794121468	1.40171530842932e-31							1.83602380047772	1.65822143567278	2.03289097788858	1.0848964653350099e-30
wqfCO0	aGwo0E	outcome	SDS	Weighted median	116	-2.18063	0.210995809562766	4.897717145112871e-25							0.112970694718438	0.0747072139346995	0.170831934333971	2.9990322275658302e-24
Xc7gzY	aGwo0E	outcome	SDR42E1	Weighted median	56	0.23492890445761	0.322957611158845	0.466962867909848							1.26481884255462	0.671616347188098	2.38196510728045	0.532952145343766
m4A4SZ	aGwo0E	outcome	SDPR	Weighted median	23	0.232701957360568	0.316146614903596	0.461695955155209							1.26200529188193	0.679128168981196	2.34514989876982	0.527708980693909
o4sXyi	aGwo0E	outcome	SDK2	Weighted median	539	-0.0833077	0.0461700754818306	0.0711741383766069							0.920068036703363	0.840464127766685	1.00721156822315	0.0981470428800177
SeAGtE	aGwo0E	outcome	SDHDP6	Weighted median	535	-0.013887	0.0061251940247954	0.0233783331943708							0.986208972128928	0.97444	0.998120141882759	0.0349542943768991
iYAMqM	aGwo0E	outcome	SDHB	Weighted median	59	-0.0215604	0.230183998696182	0.925374425937456							0.978670334670615	0.623303906707293	1.53664306232895	0.942704212294679
abHP33	aGwo0E	outcome	SDHAP3	Weighted median	223	-0.739694	0.0920525705436513	9.3148427225591e-16							0.477259723483415	0.398472225472344	0.571625395946887	3.82878088878099e-15
c4Pudb	aGwo0E	outcome	SDHAF2	Weighted median	15	0.73224522127282	0.535765565511493	0.171710916618174							2.07974485697378	0.72770808952157	5.94378258588905	0.219733575446501
hTYqVv	aGwo0E	outcome	SDHAF1	Weighted median	208	-0.0878893	0.0668346133236623	0.188500827662935							0.915862237635349	0.803413974243749	1.04404910197883	0.238996699320723
LFbXDK	aGwo0E	outcome	SDF4	Weighted median	452	-1.10265	0.0570184070737512	2.55184538986416e-83							0.331991541662777	0.296887539973644	0.371246242753778	6.93829487041601e-82
9SHlnG	aGwo0E	outcome	SDF2	Weighted median	5	-0.588231	1.53967965295266	0.702426075998958							0.555308824828505	0.027160189513505	11.3536722849111	0.753915041225673
anYtl7	aGwo0E	outcome	SDCBP2	Weighted median	263	-0.760582	0.0640794865347014	1.70779662515025e-32							0.467394249875807	0.412228301635216	0.529942713662302	1.3638906671887701e-31
foTthI	aGwo0E	outcome	SDCBP	Weighted median	112	1.41007348401323	0.373645309030119	0.0001607610052485							4.09625640237141	1.96939950860055	8.52001660439741	0.0003130622390435
t17rTF	aGwo0E	outcome	SCYL1	Weighted median	107	1.21281451175106	0.155469454763477	6.1426981941687305e-15							3.3629363692552	2.47959	4.56096691169747	2.4259950346671802e-14
StgKnC	aGwo0E	outcome	SCUBE3	Weighted median	13	0.336700006034178	0.470293718936465	0.474031127994454							1.40031891349614	0.557063699919436	3.52005176388016	0.539884266231182
y155Ez	aGwo0E	outcome	SCUBE1	Weighted median	6	3.34327575557758	0.996750659089404	0.000796021135062							28.3117172362866	4.01342288203217	199.718134975497	0.0014393467584902
0AVVCS	aGwo0E	outcome	SCRT2	Weighted median	28	-0.378356	0.262153114355399	0.148945863441532							0.684986336016607	0.409762935553473	1.14506764721336	0.193046999805913
zEQkTG	aGwo0E	outcome	SCRN1	Weighted median	1017	0.10035150274862	0.0158484732584485	2.42105462941787e-10							1.10555945697329	1.07174535790296	1.14044040768661	7.40052975232835e-10
P5voUq	aGwo0E	outcome	SCRG1	Weighted median	96	-0.00192873	0.116860584257878	0.986831870623462							0.998073127219496	0.793758931358396	1.25497796361541	0.990138813607598
GUL8yQ	aGwo0E	outcome	SCPEP1	Weighted median	112	0.181604569120716	0.081330770184112	0.0255546536859719							1.1991399231612	1.02244442927423	1.40637135295437	0.0379749302465956
Bm8EEu	aGwo0E	outcome	SCNN1A	Weighted median	57	0.549444674594329	0.191593763950642	0.0041339074528216							1.7322907656384	1.18996143287686	2.52178870155584	0.0068638646868235
eYQfcY	aGwo0E	outcome	SCNM1	Weighted median	714	-0.776297	0.0300576241277864	4.41530118198363e-147							0.460106450761784	0.433783227762698	0.488027043194985	3.26052502680922e-145
Keezzi	aGwo0E	outcome	SCN9A	Weighted median	1196	0.379154103658329	0.0168795582271264	9.6981063563923e-112							1.46104817126407	1.41350179709911	1.51019387674992	4.34374930484904e-110
B5KbuJ	aGwo0E	outcome	SCN4B	Weighted median	60	0.121774745213883	0.193694044023811	0.529547845438009							1.12949964792131	0.772699090509308	1.65105598068384	0.594074351299452
soEooc	aGwo0E	outcome	SCN2B	Weighted median	209	-0.0667971	0.0890378091014748	0.453128040240207							0.935384986793962	0.785597118617199	1.11373253896299	0.519165207263317
7MmAXn	aGwo0E	outcome	SCML4	Weighted median	744	-0.143503	0.0233407101070438	7.838076092490311e-10							0.866318450537707	0.827579168809442	0.906871132125928	2.32051580989572e-09
wOrlGx	aGwo0E	outcome	SCLY	Weighted median	249	1.04804896962274	0.0970182625516744	3.3461170384737e-27							2.85208118924122	2.35818716874097	3.44941538901108	2.21296144647545e-26
FvFvhj	aGwo0E	outcome	SCIMP	Weighted median	1371	0.0823512005105791	0.0172943365428429	1.91927208205622e-06							1.08583708941305	1.04964740276858	1.12327452212535	4.46348437931664e-06
VcxE43	aGwo0E	outcome	SCGB2B2	Weighted median	34	0.806260107348622	0.307556728431656	0.0087543642266459							2.23951675305315	1.22562255077976	4.09215323593289	0.0139288842476326
hQwud3	aGwo0E	outcome	SCGB1C1	Weighted median	207	0.0749907090073045	0.0204253165739404	0.0002411699261881							1.07787413631738	1.03557526978115	1.12190073251505	0.0004614453084226
6BjlXj	aGwo0E	outcome	SCGB1B2P	Weighted median	52	0.642675594433126	0.248202917199263	0.0096167015132472							1.90156188731536	1.16905750947251	3.09303655465325	0.0152156643882576
XZii7f	aGwo0E	outcome	SCG5	Weighted median	28	-0.243251	0.321549478736651	0.449352482805124							0.784075026963877	0.417492982224219	1.47253648344736	0.515473011378385
d7jKz9	aGwo0E	outcome	SCD5	Weighted median	863	0.0645554227596475	0.0084124684799053	1.67001899953721e-14							1.0666846952159	1.04924093589101	1.08441845918032	6.45318331123481e-14
WZt8il	aGwo0E	outcome	SCD	Weighted median	176	0.0526150321196796	0.0822977495834065	0.522611343537451							1.05402380169728	0.897009741346905	1.2385218613972	0.58752439199374
x5VmF3	aGwo0E	outcome	SCARNA13	Weighted median	81	0.0872076524310034	0.127953884879878	0.495520168033686							1.0911232305869	0.849096902525583	1.40213667107391	0.561163186809284
I7Opyo	aGwo0E	outcome	SCARF2	Weighted median	24	-1.25063	0.378087852029351	0.0009403890501021							0.286324026202608	0.136465514035884	0.600748464255329	0.0016869295658024
S9aDnH	aGwo0E	outcome	SCARF1	Weighted median	5	-0.682124	0.720312679764136	0.343647073111779							0.505541886041518	0.123201107844872	2.07443425642096	0.407469011231039
ImeX3p	aGwo0E	outcome	SCARB1	Weighted median	349	-0.0336019	0.0348600058807921	0.33509081938045							0.966956349867387	0.903094991337472	1.03533359338438	0.398759285796757
f5tcKq	aGwo0E	outcome	SCAI	Weighted median	311	1.37250736015819	0.0923882192086805	6.37352607405019e-50							3.9452304178479	3.29177341184819	4.72840657679817	8.34538321326004e-49
EKj0vR	aGwo0E	outcome	SCAF8	Weighted median	206	0.0551734760614343	0.0506051518086818	0.275592510106376							1.05672391507873	0.956941879370606	1.16691040153219	0.335248123135657
VRMz8Y	aGwo0E	outcome	SCAF11	Weighted median	9	2.04883598781331	0.501139330762671	4.34441100653484e-05							7.75886	2.90549246600599	20.7193713381506	8.93980910345888e-05
gH5CWA	aGwo0E	outcome	SBSPON	Weighted median	25	-3.67752	0.370495041014968	3.21010179103049e-23							0.0252856650809837	0.0122321454216169	0.0522692329554698	1.83360687689073e-22
i7DbPn	aGwo0E	outcome	SBNO2	Weighted median	7	0.332166323680759	0.553106072766067	0.548141589826478							1.39398468189551	0.471459734661257	4.12165271071451	0.611711106241332
YWeOCI	aGwo0E	outcome	SBF1	Weighted median	362	-0.223054	0.0320093056544802	3.2057389185665998e-12							0.800072019811315	0.75141906788663	0.851875157607171	1.0920777809539799e-11
nF8c0v	aGwo0E	outcome	SBDS	Weighted median	852	-0.432611	0.0421467090191034	1.01936957351966e-24							0.648812629093576	0.597369839506764	0.704685439122427	6.1677789394478405e-24
u3Z5Fx	aGwo0E	outcome	SASH1	Weighted median	614	0.363628814848745	0.0619123751188064	4.27251741604382e-09							1.43854015030262	1.27415161816286	1.6241377670708	1.20593714166036e-08
PzbQ9n	aGwo0E	outcome	SART1	Weighted median	239	0.440566854954245	0.0706535708909226	4.50072194590209e-10							1.55358762779925	1.35267735720221	1.78433867056302	1.35199541708258e-09
UXZrDt	aGwo0E	outcome	SARDH	Weighted median	213	0.224871370275522	0.0690619001612362	0.0011296019934289							1.2521616406257	1.09363831990343	1.4336629813711	0.0020082671398218
57z9iV	aGwo0E	outcome	SAR1B	Weighted median	330	-0.419723	0.0532211494949724	3.11023673569799e-15							0.657228598530391	0.592125406601164	0.729489776845817	1.24447254761228e-14
j8jHMY	aGwo0E	outcome	SAP30L	Weighted median	161	0.147165930715862	0.100928079651071	0.144805614950243							1.15854618547953	0.950608374254419	1.41196869314548	0.188105277152503
k1wq0L	aGwo0E	outcome	SAP18	Weighted median	119	0.597822384062804	0.0855950151600703	2.8625307375329397e-12							1.81815524257092	1.53734384966763	2.15025967469984	9.78330031313317e-12
PDlj7o	aGwo0E	outcome	SAMSN1	Weighted median	236	0.230255708714343	0.0836078552601452	0.0058872466689352							1.2589218860714	1.0686373288407	1.48308904476407	0.0095910188684387
AI7FM0	aGwo0E	outcome	SAMM50	Weighted median	738	-0.14254	0.0221239679495327	1.17315084343095e-10							0.867153248662682	0.830354519377633	0.905582783158508	3.64969591423295e-10
4gpd5O	aGwo0E	outcome	SAMHD1	Weighted median	489	-0.0684062	0.0441287227431506	0.121105116298506							0.933881041581335	0.856502099543254	1.01825062692797	0.159752255849546
QW59BB	aGwo0E	outcome	SAMD9	Weighted median	28	0.445394326942523	0.482754328605931	0.356210098236465							1.5611056604996	0.606043109820666	4.02125004599928	0.420699198737177
ORDrl5	aGwo0E	outcome	SAMD8	Weighted median	93	-0.598923	0.221052075669061	0.0067401190803203							0.549403210902909	0.356227848397838	0.847333776704974	0.010887104885567
QOVKUk	aGwo0E	outcome	SAMD4B	Weighted median	162	0.0528731343759096	0.11942412901038	0.657958073847425							1.05429588272947	0.834270024631466	1.3323501690371	0.713911460813168
SqxLZe	aGwo0E	outcome	SAMD3	Weighted median	1529	-0.0135211	0.0188838769201921	0.473983855406122							0.986569914226367	0.950722094341761	1.02376940795776	0.539855317778182
0lUK5J	aGwo0E	outcome	SAMD1	Weighted median	84	-0.195444	0.169150362883122	0.247909150604361							0.822469757499496	0.590386260624218	1.14578632179899	0.305186586521632
nXqoit	aGwo0E	outcome	SALL4	Weighted median	464	0.288075153041784	0.0540071468333867	9.60624091943876e-08							1.3338575438084	1.19987951219455	1.48279550495908	2.4713696825654e-07
xv6h5z	aGwo0E	outcome	SAFB2	Weighted median	89	0.551100713825316	0.194419488814225	0.0045883663486964							1.73516188379176	1.18535050510421	2.53999703041345	0.0075771848751386
BSydG6	aGwo0E	outcome	SAFB	Weighted median	27	-0.186682	0.255176332763072	0.464423710595082							0.829707190182271	0.503169576458117	1.36815509849782	0.530397257721781
ER24sh	aGwo0E	outcome	SACS	Weighted median	234	-0.995175	0.0787634588500697	1.3542495557110398e-36							0.369658788092273	0.31677888488246	0.43136593420534	1.2314373421828202e-35
3bV5r1	aGwo0E	outcome	S1PR4	Weighted median	168	0.127339077301496	0.0815540622766149	0.118427769853017							1.13580207719871	0.968015785251359	1.33267078721648	0.156607165985401
qn107x	aGwo0E	outcome	S100A9	Weighted median	229	0.114094719401978	0.0409584850789002	0.0053425685664335							1.12085828688291	1.03439435236915	1.21454965062081	0.0087489695998249
cFHlKw	aGwo0E	outcome	S100A4	Weighted median	19	0.618951878465856	0.768355331160339	0.420499932044758							1.85698068004945	0.411879449557831	8.3723	0.48668052343463
nB0Kt4	aGwo0E	outcome	S100A3	Weighted median	20	-0.666609	0.436293671191131	0.126539850265174							0.51344686076078	0.218330712718585	1.20746951055347	0.166177947915957
fI2ftc	aGwo0E	outcome	S100A10	Weighted median	688	-0.226834	0.045830804640819	7.44521269675243e-07							0.797053206013118	0.728576811034604	0.87196545867779	1.79212552551969e-06
0YTZA2	aGwo0E	outcome	S100A1	Weighted median	138	0.061508772876173	0.0449948020256282	0.171619185719615							1.06343982591379	0.973671755225975	1.16148410105321	0.219627567923172
gtKq3n	aGwo0E	outcome	RYK	Weighted median	567	0.293513050375863	0.0369514131513907	1.9700569102129203e-15							1.34113068155545	1.24743354988446	1.44186558488504	7.966499266206851e-15
Ku2DmQ	aGwo0E	outcome	RXRB	Weighted median	26	1.51449863875055	0.415237581097029	0.0002650039651431							4.54714079506799	2.01502777576092	10.2611436223819	0.0005051507076424
BENmPP	aGwo0E	outcome	RWDD2B	Weighted median	1899	0.042809216126036	0.0143628789860963	0.002877353720788							1.04373874733253	1.01476592822593	1.07353877616664	0.0048724859761463
YvjbFA	aGwo0E	outcome	RUSC1-AS1	Weighted median	211	-0.116748	0.0868419216659521	0.178828211126065							0.889809553162048	0.750543257873745	1.05491726505074	0.227905829785452
qbV0De	aGwo0E	outcome	RUNX2	Weighted median	2328	0.103683803333239	0.0201165557582809	2.54780059283132e-07							1.10924965841357	1.06636466453062	1.15385931812755	6.34580250504893e-07
j16kEy	aGwo0E	outcome	RUNX1	Weighted median	48	0.11375522274487	0.294060396028527	0.698872398652428							1.12047782382804	0.629642454356914	1.99394203012042	0.750851251780569
pnufqi	aGwo0E	outcome	RUNDC3A	Weighted median	554	0.100205089807999	0.0315715725745572	0.0015040425905868							1.10539760061139	1.03906867543666	1.17596063121036	0.002634340782201
iGtayx	aGwo0E	outcome	RUFY2	Weighted median	713	-0.736293	0.0666610887569138	2.3094537035944197e-28							0.478885856924659	0.420231832246182	0.545726540363837	1.59349080054015e-27
XQE4vO	aGwo0E	outcome	RTP4	Weighted median	453	0.0399185336990883	0.0379920305082655	0.293392680630985							1.04072598664238	0.966044049321929	1.12118135817201	0.354310264274672
LzlRef	aGwo0E	outcome	RTN4RL1	Weighted median	23	-0.295588	0.249333434176603	0.235815453201138							0.744094275150601	0.456447738168243	1.21301135708075	0.292008994247439
sO4qAM	aGwo0E	outcome	RTN4	Weighted median	1341	-0.160699	0.0229324821349081	2.4264566687599e-12							0.851548391249562	0.814120723599463	0.890696725460676	8.32864856574344e-12
ddk9iw	aGwo0E	outcome	RTN2	Weighted median	164	0.394593793848869	0.0975326628764351	5.21535355670213e-05							1.48378134737959	1.22559908644652	1.79635176884383	0.0001065302703058
x4Pa3b	aGwo0E	outcome	RTKN	Weighted median	153	-0.247535	0.182949862790921	0.176049177363913							0.780723004450635	0.545465025183188	1.11744728174593	0.224639241400661
1z0Ols	aGwo0E	outcome	RTDR1	Weighted median	199	0.497722480948837	0.0535089719561169	1.38264532788802e-20							1.64497054938695	1.48118863310379	1.82686259391569	7.07402932204348e-20
qTB24q	aGwo0E	outcome	RTCA	Weighted median	539	-0.265951	0.0448245038298089	2.9713744388166203e-09							0.766476310699853	0.702010081140742	0.836862533240851	8.47838809061206e-09
OpxCjw	aGwo0E	outcome	RSPH10B	Weighted median	185	-0.113263	0.0750143407951657	0.131071504135088							0.892915434974213	0.770826850681661	1.03434120556402	0.171627276598525
g83WIU	aGwo0E	outcome	RSPH1	Weighted median	12	0.126245784806169	0.295655087200032	0.669376709990476							1.13456099186979	0.635566732431267	2.02532413763771	0.724150992727744
3iRTVS	aGwo0E	outcome	RSL1D1	Weighted median	29	-1.69351	0.937415004045634	0.0708292137455762							0.183873612482439	0.0292803084924234	1.15468405587635	0.0977150417948256
IjUqPf	aGwo0E	outcome	RSAD2	Weighted median	29	-1.69864	0.422255445821862	5.75154004104739e-05							0.182932061648823	0.0799574135475826	0.418524533177579	0.0001170614809244
aaRTEL	aGwo0E	outcome	RSAD1	Weighted median	376	-0.268186	0.043879749732514	9.84856739884592e-10							0.764765338586874	0.701741238781089	0.833449697383891	2.8976759883579604e-09
BgeBIS	aGwo0E	outcome	RRS1	Weighted median	16	1.96846273198341	0.381242501319848	2.42656510121348e-07							7.15966170522984	3.39134782000094	15.1151572926308	6.05269088636018e-07
bC3uef	aGwo0E	outcome	RRP7B	Weighted median	553	0.0501555318780422	0.02456699259682	0.0411930042287869							1.05143461525984	1.00200623619246	1.10330126723311	0.0591552231822207
HRiTrn	aGwo0E	outcome	RRP7A	Weighted median	1494	0.043255056542118	0.0191897364747255	0.0241916097548722							1.04420419199923	1.00565912574652	1.08422661980953	0.0360883563342075
FdUh6S	aGwo0E	outcome	RRP1B	Weighted median	460	-0.307253	0.027341779952163	2.66808785574033e-29							0.735464165038713	0.697088188263906	0.775952809361493	1.90534177995287e-28
qwh2Vh	aGwo0E	outcome	RRP1	Weighted median	239	0.0627917253923422	0.0697891572980887	0.368261460867489							1.06480504428215	0.928676315933615	1.22088801326743	0.433192555627328
FQijo5	aGwo0E	outcome	RRN3P3	Weighted median	85	0.0742624202094048	0.126950704700014	0.558567536775955							1.07708941844366	0.839825656054659	1.38138387052062	0.621829146164511
oSKUmQ	aGwo0E	outcome	RRN3	Weighted median	436	0.236767431106596	0.0463841532665861	3.31688394907879e-07							1.26714638467127	1.15702781749828	1.38774533844591	8.19606951114587e-07
gFDYR5	aGwo0E	outcome	RREB1	Weighted median	363	-0.00477175	0.053213017076005	0.928547394752308							0.995239617416417	0.896668309624262	1.10464693069195	0.945153537507949
5NZwnc	aGwo0E	outcome	RRBP1	Weighted median	476	-0.0148836	0.0496147325856235	0.764190192362384							0.98522664108692	0.893929426972678	1.08584806028215	0.809045261299478
u4c7KH	aGwo0E	outcome	RRAS	Weighted median	71	-0.379008	0.222789972210872	0.088907635174006							0.684540346572253	0.442340187307675	1.05935544526802	0.120498858755629
jtzcky	aGwo0E	outcome	RRAD	Weighted median	10	0.8432106373536	0.70969594060353	0.23478241900078							2.3238159426867	0.578224309872253	9.33914476317664	0.290875610540063
flgRsE	aGwo0E	outcome	RPUSD3	Weighted median	379	0.425180760763609	0.0785106473189024	6.10900479698601e-08							1.52986693458642	1.31166837028314	1.78436325108276	1.59363799760006e-07
9uJoKF	aGwo0E	outcome	RPUSD2	Weighted median	158	2.30271572546391	0.117664259851548	2.7746849969188e-85							10.0013064100266	7.94143330646558	12.5954756587582	7.81960997734052e-84
cHscIV	aGwo0E	outcome	RPSA	Weighted median	410	-0.725562	0.0920227105571868	3.15540229265151e-15							0.484052249777686	0.404167074123666	0.579727037445773	1.2621353693131101e-14
OkWEFk	aGwo0E	outcome	RPS7	Weighted median	55	1.68094364524473	0.320837550712946	1.6124273179995e-07							5.37062154217459	2.86366434955906	10.0722613506401	4.07878887819403e-07
Cj9VTP	aGwo0E	outcome	RPS6KB1	Weighted median	349	0.864335066890192	0.0691860748405413	8.1617981295177e-36							2.37342739071609	2.07244767454411	2.71811812099939	7.25341451686567e-35
HVHnim	aGwo0E	outcome	RPS4XP16	Weighted median	193	0.119389194792012	0.0506576901640338	0.018434003932048							1.12680838091258	1.02030348981089	1.24443083844608	0.0279929639521399
DzC3Xs	aGwo0E	outcome	RPS3A	Weighted median	664	0.316115272052739	0.0729400668049545	1.46487848463784e-05							1.37178837537443	1.18904770768728	1.58261383008134	3.14964493957276e-05
fZXJbB	aGwo0E	outcome	RPS3	Weighted median	26	-1.93042	0.367959702868233	1.55208927203512e-07							0.145087806886191	0.0705370501806648	0.298431415165912	3.9307872202979e-07
ZPbuG1	aGwo0E	outcome	RPS2P32	Weighted median	3	-1.48841	1.38303710461801	0.281842849250383							0.22573151439338	0.0150081528771967	3.39513576435838	0.341891722278561
uNys4d	aGwo0E	outcome	RPS29	Weighted median	419	-0.0802072	0.0376989734111106	0.0333727433936887							0.922925088494422	0.857188701175095	0.993702690906612	0.0486575859366782
7pXg8E	aGwo0E	outcome	RPS28	Weighted median	115	0.281971826156769	0.0483708691903891	5.56361072430161e-09							1.32574136823115	1.20582613656551	1.45758175423651	1.55824627593782e-08
Xx92pz	aGwo0E	outcome	RPS25	Weighted median	154	-0.235779	0.052821087154688	8.05472616680324e-06							0.789955423695193	0.712262973015131	0.876122436610494	1.77377033439681e-05
20lTtc	aGwo0E	outcome	RPS21	Weighted median	3	0.347032429080287	0.438854686772196	0.429079139056895							1.41486260731956	0.598623301898523	3.34406661291384	0.495183066408798
Az7mHy	aGwo0E	outcome	RPS20	Weighted median	139	1.07348105796803	0.264815433530849	5.04148900896285e-05							2.92554578947068	1.74097065997772	4.91611855561034	0.0001031281029811
5J8hnH	aGwo0E	outcome	RPS19BP1	Weighted median	45	0.607744979302697	0.254612785853259	0.0169893479227275							1.83628586377575	1.11483222086634	3.0246217416306	0.0259395109381743
r7VUWq	aGwo0E	outcome	RPS16	Weighted median	342	-0.0862788	0.0367303191218261	0.0188248299542522							0.91733839672184	0.853619039406777	0.985814157431403	0.0285557318297077
DVutlC	aGwo0E	outcome	RPS15AP24	Weighted median	88	0.230788181087845	0.226580807356463	0.308407638771453							1.25959240569688	0.80790548498555	1.96381019559191	0.370396562008656
PxoYNW	aGwo0E	outcome	RPS15	Weighted median	16	-0.476608	0.568646973334778	0.40194978690281							0.620885809081029	0.203689976523844	1.89257809587443	0.467764188315262
S4xCC4	aGwo0E	outcome	RPS14	Weighted median	165	0.213958121658555	0.0432039435805417	7.33481227115431e-07							1.23857078441712	1.13800689235947	1.34802135058342	1.76641186814778e-06
dCCMrv	aGwo0E	outcome	RPS10	Weighted median	761	-0.0528685	0.0317088097981091	0.0954524955500477							0.948504769716681	0.891350341792417	1.0093240065025	0.128537074104151
hfUVHQ	aGwo0E	outcome	RPRD1A	Weighted median	168	1.21877826152614	0.196109869544624	5.1399000936204e-10							3.38305200295404	2.30343829426501	4.96867699177643	1.539228249531e-09
otmU4p	aGwo0E	outcome	RPP25	Weighted median	152	0.958501425736091	0.182576792262971	1.52220158350265e-07							2.60778558341436	1.82330522711257	3.72979002524623	3.85786307032171e-07
yRH458	aGwo0E	outcome	RPP14	Weighted median	564	-0.268614	0.0417945621000544	1.30143921559954e-10							0.764438430702195	0.704313905328503	0.829695551817733	4.0388844505473903e-10
wHujiw	aGwo0E	outcome	RPN1	Weighted median	779	-0.246495	0.0259013607176457	1.78765644481982e-21							0.781534893606545	0.742849250690072	0.822235183460428	9.49834279882055e-21
dTUB1Y	aGwo0E	outcome	RPLP1	Weighted median	86	0.330107232788794	0.230683932821897	0.152432047762384							1.39111729385289	0.885118915200844	2.18638116531207	0.197167106236714
IaZxDn	aGwo0E	outcome	RPL9P33	Weighted median	57	0.628358064559732	0.093490363004875	1.80357945161791e-11							1.87453019350055	1.56067271062468	2.2515056631821	5.89066743674992e-11
YmnfeP	aGwo0E	outcome	RPL9	Weighted median	930	-0.023755	0.0411797451703646	0.564033365750769							0.976524940276023	0.900804263089757	1.05861061948157	0.627249693143014
xfeoem	aGwo0E	outcome	RPL7AP64	Weighted median	113	0.0132738754017002	0.0324170743929624	0.682193511970747							1.01336236438288	0.950978722590888	1.07983833618267	0.735764006285002
pxCxcS	aGwo0E	outcome	RPL4P1	Weighted median	273	0.0029098964577513	0.0401784834797515	0.942264288230618							1.00291413431603	0.926964572826176	1.08508651818723	0.956121400609141
YkIzct	aGwo0E	outcome	RPL39P38	Weighted median	306	0.125338296885153	0.0165619809102128	3.79502961219211e-14							1.13353185850769	1.09732655200374	1.17093172666392	1.43656308276091e-13
THM6r8	aGwo0E	outcome	RPL39L	Weighted median	76	-0.0895735	0.0630924557324172	0.155689746413581							0.914321054812043	0.807966469899208	1.03467535153642	0.201007200890373
Mdf89O	aGwo0E	outcome	RPL37AP1	Weighted median	10	1.07024674074336	0.385560297942714	0.0055062352236918							2.91609893163491	1.36964085628454	6.20865896345285	0.0090035593537897
RaKum3	aGwo0E	outcome	RPL37A	Weighted median	212	0.357035527652748	0.0823693028048562	1.4604516041112e-05							1.42908664104591	1.21603029168058	1.67947183683509	3.14040002602418e-05
9kK3gF	aGwo0E	outcome	RPL37	Weighted median	182	0.624307671586755	0.0985797128832253	2.40402403895918e-10							1.8669529653122	1.5389362551382	2.26488482745831	7.34983597974507e-10
ZwfnWf	aGwo0E	outcome	RPL36AL	Weighted median	803	-0.018959	0.014058287444317	0.177466508859914							0.981219629227128	0.95455195576039	1.00863232741865	0.226295793748712
58ld4u	aGwo0E	outcome	RPL36	Weighted median	270	-1.08478	0.163863995109369	3.5926523548466004e-11							0.337977764034553	0.245134410899065	0.465985042911133	1.15162084276205e-10
C6tRMY	aGwo0E	outcome	RPL35P2	Weighted median	64	-0.134684	0.167391219581202	0.421046179525751							0.873991839474953	0.629536760576741	1.21337113780141	0.487210015625396
Lhv0rx	aGwo0E	outcome	RPL35AP26	Weighted median	41	-0.69993	0.106742844908625	5.4842296822014296e-11							0.496620128508791	0.40286818693199	0.612189197460069	1.73677819865254e-10
cOsEX9	aGwo0E	outcome	RPL35A	Weighted median	8	-1.00429	0.3668834245207	0.0061933187343506							0.366302962725125	0.178460849376531	0.751861604211607	0.0100554924882716
S0WImb	aGwo0E	outcome	RPL32	Weighted median	182	0.21913834295083	0.0972023426076115	0.0241675355289347							1.24500350223245	1.02903528973617	1.50629792392104	0.0360588536216095
g7wJZb	aGwo0E	outcome	RPL31P52	Weighted median	46	-0.467723	0.138315006503753	0.0007207007589225							0.626426801766926	0.477676878734148	0.821497869044519	0.0013101552690995
J7fVQS	aGwo0E	outcome	RPL31P11	Weighted median	41	-0.330766	0.258829374497358	0.201273484974462							0.718373047112007	0.432543727076968	1.19308130603212	0.253402496895855
nThXpx	aGwo0E	outcome	RPL30	Weighted median	55	-1.11909	0.176771780097329	2.4407655991012903e-10							0.3265780519724	0.230948856998175	0.461804511251295	7.45810155909202e-10
mHhtRN	aGwo0E	outcome	RPL26L1	Weighted median	17	-1.03361	0.318950341632203	0.0011925573831405							0.35572128019074	0.190376717681892	0.664669665079401	0.0021150928881454
Xbcuk3	aGwo0E	outcome	RPL23AP82	Weighted median	42	0.470456948053062	0.175403563111601	0.007315279477137							1.60072547451492	1.1350378113626	2.25747725680168	0.0117611080946802
YqR6tk	aGwo0E	outcome	RPL23AP64	Weighted median	4	0.869076824167868	0.979480517251078	0.374926329198018							2.38470833192463	0.34969113356282	16.2624478648074	0.439964024735622
ipbhaa	aGwo0E	outcome	RPL23A	Weighted median	9	-2.19498	0.906125925428047	0.0154193257682883							0.111360899545591	0.0188548365244686	0.657722485766963	0.0236843873684279
MNhQGU	aGwo0E	outcome	RPL23	Weighted median	8	5.04148729192272	1.04889216514907	1.5360492756551e-06							154.699927962987	19.799538873865	1208.71843855633	3.60158720290408e-06
tY2vCV	aGwo0E	outcome	RPL22	Weighted median	63	-0.0231586	0.223002911676925	0.917289120013365							0.977107456983923	0.631129408175074	1.51274678398245	0.936567904244187
8P6vys	aGwo0E	outcome	RPL21P44	Weighted median	132	0.256394892248252	0.0318510905716352	8.292979549898879e-16							1.29226293180977	1.21405592066582	1.37550787941774	3.4172830820223e-15
RxeexI	aGwo0E	outcome	RPL21	Weighted median	39	-2.45778	0.378614092920663	8.497521442782879e-11							0.0856247790740676	0.0407677404859248	0.179838340415607	2.66592399719186e-10
a8XT0P	aGwo0E	outcome	RPL18A	Weighted median	29	-4.63958	0.496173394929366	8.7042599905477e-21							0.0096617082728054	0.0036534452202494	0.0255508434152526	4.48775366638518e-20
iJYScP	aGwo0E	outcome	RPL15	Weighted median	133	0.536285104812774	0.156339007519371	0.0006029795373718							1.70964390273264	1.25842463633168	2.32265182178183	0.0011057945018294
KmIMyA	aGwo0E	outcome	RPL13P5	Weighted median	110	-0.141833	0.0613848929744144	0.0208578098728279							0.867766361931619	0.769397791516236	0.978711489951225	0.0314234685638972
3KCETN	aGwo0E	outcome	RPF2	Weighted median	1080	0.230781299265234	0.031673084408586	3.18455992529973e-13							1.25958373743521	1.18376738741022	1.34025587162205	1.1498816985059399e-12
ddAF53	aGwo0E	outcome	RPF1	Weighted median	337	0.621656589135258	0.099519322345824	4.19505337488506e-10							1.86201007396932	1.53203775816647	2.26305226296291	1.26240008454314e-09
zo2yAw	aGwo0E	outcome	RPE	Weighted median	86	-1.32318	0.276106288399719	1.64892079896405e-06							0.26628712249648	0.154997162338473	0.457484708349751	3.85580698779859e-06
mvsmiA	aGwo0E	outcome	RPAP3	Weighted median	1149	-0.107972	0.0222446813801283	1.21105577578857e-06							0.897653015195217	0.859356643893457	0.937656026068923	2.86280628218013e-06
8MWvXD	aGwo0E	outcome	RP6-65G23.3	Weighted median	160	-0.00755815	0.0295840915319962	0.79835211942298							0.99247033699384	0.936558798750864	1.0517197330551	0.838670361398603
2DpNqI	aGwo0E	outcome	RP6-109B7.3	Weighted median	56	0.0566687796694131	0.121042669696365	0.63966164751101							1.05830522013252	0.83479019186188	1.34166638501312	0.697259358541221
ssx8s5	aGwo0E	outcome	RP5-997D24.3	Weighted median	28	-0.297789	0.128027498471949	0.0200198145711198							0.742458035056284	0.577687146805954	0.954225720387721	0.030242138553603
Z7tp0G	aGwo0E	outcome	RP5-995J12.2	Weighted median	642	0.0115242701182353	0.0145700095719642	0.428968321106216							1.01159093034315	0.98311129191846	1.04089559215174	0.495066740664152
rGlD6x	aGwo0E	outcome	RP5-991G20.4	Weighted median	139	0.722803289760165	0.0983731973846862	2.01852790238628e-13							2.06020046208789	1.69891841631249	2.49831063294946	7.37365675551534e-13
m0soxC	aGwo0E	outcome	RP5-968P14.2	Weighted median	215	0.747811285916864	0.0740685878485284	5.74243099025224e-24							2.11237157587673	1.82692980131796	2.44241112677287	3.37569393397705e-23
C6TSm5	aGwo0E	outcome	RP5-968J1.1	Weighted median	38	0.0983967530342329	0.0887736007087031	0.26768864777874							1.10340047576195	0.92718746675307	1.31310296306663	0.326735571740904
gMr4Rr	aGwo0E	outcome	RP5-955M13.3	Weighted median	6	0.617138002569165	0.687600937964814	0.369439637754625							1.85361540057564	0.481639275669975	7.13374142603248	0.43438195073403
bvG0uj	aGwo0E	outcome	RP5-940J5.8	Weighted median	21	-0.389496	0.101773256726304	0.0001296630046151							0.677398056711407	0.554897542418858	0.826942078777526	0.0002549650301305
UCSs3r	aGwo0E	outcome	RP5-931K24.3	Weighted median	116	-0.119649	0.108185873819652	0.268745855201672							0.887232027937811	0.717707584896141	1.09679859592476	0.327865775624842
emPjoh	aGwo0E	outcome	RP5-894D12.3	Weighted median	182	-0.102019	0.0620038647210823	0.099895625684137							0.903012693070873	0.79967791073891	1.01970044801368	0.134063446584631
QotFkt	aGwo0E	outcome	RP5-894A10.2	Weighted median	373	0.0968835820870052	0.0313638713141232	0.0020081886112165							1.10173210480244	1.03604480846008	1.17158410605479	0.0034652651749889
P1ybMQ	aGwo0E	outcome	RP5-837J1.2	Weighted median	18	0.0913208212653555	0.170890146432898	0.593076448069361							1.09562044721865	0.783782386231628	1.53152735433997	0.654143818266407
QVhkVo	aGwo0E	outcome	RP5-836N10.1	Weighted median	68	0.514588961227055	0.152561652051304	0.0007435659205696							1.67295071284504	1.24056649141186	2.25603714672604	0.0013497349784649
cnnHvP	aGwo0E	outcome	RP5-823G15.6	Weighted median	312	0.490442290974863	0.0297787108900946	6.0709486138773005e-61							1.63303833836904	1.54045221223708	1.73118918808284	1.03707840377379e-59
GZ0sKB	aGwo0E	outcome	RP5-1180C10.2	Weighted median	685	-0.106327	0.0182139257715174	5.29285348077387e-09							0.899130306613108	0.867598175161511	0.931808447060973	1.4840115806508e-08
Nq62Va	aGwo0E	outcome	RP5-1160K1.3	Weighted median	112	-0.244973	0.0626746631910209	9.28134907303707e-05							0.782725441994047	0.692244796929652	0.885032462883267	0.0001852557424973
GSTOJ5	aGwo0E	outcome	RP5-1157M23.2	Weighted median	1127	-0.188255	0.0168734269863203	6.62613567749255e-29							0.828403311962296	0.80145450702398	0.856258267007996	4.66977148181404e-28
KD1s2Z	aGwo0E	outcome	RP5-1154L15.2	Weighted median	358	-0.00715907	0.0085117309647289	0.400301502314265							0.992866493867909	0.976439912663268	1.00956941831351	0.466131502353077
eZ2ycg	aGwo0E	outcome	RP5-1142A6.9	Weighted median	434	0.0801971591686975	0.0294254318298486	0.0064216440079178							1.08350066870869	1.02277887770772	1.14782747735593	0.0104060248277353
QGuARa	aGwo0E	outcome	RP5-1142A6.2	Weighted median	8	0.161920344538049	0.430629055772936	0.706910301991062							1.1757665813606	0.50554784063263	2.73451282496719	0.757961809060209
Wjuw2s	aGwo0E	outcome	RP5-1129J21.3	Weighted median	287	0.0233542339592639	0.0412412438648212	0.571201107446645							1.0236290795131	0.944142091019591	1.10980804943595	0.633737161138758
NgfFfL	aGwo0E	outcome	RP5-1119A7.14	Weighted median	76	0.237162607860278	0.0680174383431257	0.0004888527966024							1.26764723042079	1.10943228408601	1.44842504030549	0.0009056434811021
PWBM2T	aGwo0E	outcome	RP5-1115A15.1	Weighted median	356	-0.158508	0.0291667962270589	5.49345682729733e-08							0.853415758307325	0.805996915279114	0.903624372154145	1.43799739118831e-07
FjYRMQ	aGwo0E	outcome	RP5-1112D6.4	Weighted median	877	0.0969715483640607	0.0129232168862694	6.205565057843191e-14							1.10182902433678	1.07427073278893	1.13009426936465	2.3211200072125e-13
83P6Eg	aGwo0E	outcome	RP5-1109J22.2	Weighted median	34	0.398787131003638	0.148638369619788	0.007297910432957							1.49001640654927	1.11344178644293	1.9939514744445	0.0117343749103133
e5naRz	aGwo0E	outcome	RP5-1107A17.4	Weighted median	12	0.0155548468883899	0.152966150480845	0.91900419776402							1.01567645322374	0.7525718478443	1.37076434706947	0.937913202266943
QAXisR	aGwo0E	outcome	RP5-1096D14.3	Weighted median	92	-0.286265	0.0833953382018424	0.0005977643847766							0.751063505652206	0.637806755735698	0.884431506016123	0.0010968412531986
xE3vPT	aGwo0E	outcome	RP5-1074L1.1	Weighted median	344	-0.296172	0.0218063456021673	5.12696496615337e-42							0.743659590344706	0.71254491794839	0.776132945981817	5.4505584295863e-41
QOwITM	aGwo0E	outcome	RP5-1071N3.1	Weighted median	33	0.0318144666451075	0.148549491860126	0.830416474229041							1.03232595663826	0.771558690066109	1.38122594492168	0.865398157961805
SBhgIA	aGwo0E	outcome	RP5-1068B5.3	Weighted median	22	0.956507498826343	0.322620950607711	0.0030287700742265							2.60259103006561	1.38288297957449	4.89808622264058	0.0051164413738078
9zLX2a	aGwo0E	outcome	RP5-1050D4.4	Weighted median	140	0.033817926834111	0.0754068628529727	0.653812013030019							1.03439625378092	0.89227622562418	1.19915288462103	0.710177100385252
lid9QK	aGwo0E	outcome	RP5-1042K10.12	Weighted median	40	-0.241999	0.123901504838074	0.0508014560899515							0.785057269782551	0.615792293486907	1.00084870070161	0.0718321742239868
7qCphE	aGwo0E	outcome	RP5-1042I8.7	Weighted median	97	0.408597460956902	0.0808614411313665	4.3479435518667e-07							1.50470589568828	1.28416542975202	1.76312161974044	1.06448017886353e-06
j0JBEu	aGwo0E	outcome	RP5-1028K7.2	Weighted median	52	-0.918091	0.169022225127707	5.57959591915142e-08							0.399280599445074	0.286684086394299	0.556099918549188	1.45984947142166e-07
0EoHr3	aGwo0E	outcome	RP5-1024G6.8	Weighted median	131	-0.194587	0.0428112960902658	5.48763469755796e-06							0.823174546478803	0.756920420812649	0.895227972899815	1.22644477251054e-05
C3mIOD	aGwo0E	outcome	RP5-1022P6.5	Weighted median	81	-0.153601	0.0760032359098746	0.0432819717759313							0.857614209703764	0.738918785405921	0.995376145812517	0.061958774061787
EYolgL	aGwo0E	outcome	RP5-1022P6.3	Weighted median	87	-0.00723761	0.0556151531339293	0.896457810870067							0.992788523293041	0.890258592364723	1.10712669378942	0.919576114084299
t1fHv6	aGwo0E	outcome	RP5-1021I20.5	Weighted median	139	0.617586671789554	0.104544120157673	3.4749396795306104e-09							1.85444724735038	1.51086176945101	2.27616759040439	9.8685010915067e-09
Tiqryk	aGwo0E	outcome	RP4-800J21.3	Weighted median	16	-0.270084	0.243789764112089	0.267924343638694							0.763315552577877	0.473354025294718	1.23089823191955	0.326966961068067
9WmNqZ	aGwo0E	outcome	RP4-799D16.1	Weighted median	134	0.110840369073277	0.0408438215797649	0.0066524146400157							1.11721655030595	1.03126528335188	1.21033146410267	0.0107514145662359
lshwzl	aGwo0E	outcome	RP4-794H19.1	Weighted median	146	0.151709739850904	0.0343846296840088	1.0235471906668e-05							1.16382237614437	1.08797249270104	1.24496026535712	2.23329661074604e-05
2uUPna	aGwo0E	outcome	RP4-781K5.8	Weighted median	12	0.679898736627914	0.603404542770588	0.259839317102626							1.97367786083519	0.604850374023533	6.44027757218419	0.318192543509928
3mnrIg	aGwo0E	outcome	RP4-778K6.3	Weighted median	289	-0.166931	0.0346948291526112	1.49878750406563e-06							0.846258333692065	0.790624236978245	0.905807251850005	3.51739105331597e-06
Y7w5wQ	aGwo0E	outcome	RP4-777O23.2	Weighted median	70	-0.228704	0.0785913348005419	0.0036137889192848							0.795563847724496	0.681988018476233	0.928054186670819	0.006046603467433
rpXkaH	aGwo0E	outcome	RP4-773N10.5	Weighted median	49	0.0086110656604515	0.161174235970112	0.957391644816204							1.00864824753491	0.73543697189504	1.38335618976802	0.967559057941116
ZKHrJ9	aGwo0E	outcome	RP4-773N10.4	Weighted median	135	-0.094039	0.044929201087305	0.0363447345494307							0.910247223111686	0.833517753773588	0.994040023060623	0.0526628221424117
xUb5jV	aGwo0E	outcome	RP4-773A18.4	Weighted median	250	0.0465712209935234	0.0385776062847438	0.22735179016818							1.04767269270154	0.971376746658308	1.12996123780857	0.282719001451838
JpN4oa	aGwo0E	outcome	RP4-742C19.12	Weighted median	216	-0.0735584	0.0383244019716059	0.0549385844247242							0.929081898543962	0.861849847631134	1.00155865499612	0.0772508364073162
AJXgFh	aGwo0E	outcome	RP4-740C4.6	Weighted median	248	0.374104661378824	0.0391368312097387	1.19026495912995e-21							1.4536892876205	1.34634898359955	1.56958750716532	6.3811893408461204e-21
CFFQ3f	aGwo0E	outcome	RP4-738P15.1	Weighted median	7	1.22591583748627	0.57288353947479	0.0323625173498667							3.40728517377115	1.10856246578091	10.4726550048061	0.047293488714227
qa89ub	aGwo0E	outcome	RP4-724E16.2	Weighted median	163	0.0578363332979815	0.0330503361569323	0.0801274768244645							1.05954156984427	0.993081716703949	1.13044910539092	0.109475863203048
X3tdPq	aGwo0E	outcome	RP4-714D9.5	Weighted median	10	0.439886574883971	0.209260140163481	0.0355441677430518							1.55253111250253	1.03018325115918	2.33973213268238	0.0515860316982958
MSyKJL	aGwo0E	outcome	RP4-704D21.2	Weighted median	14	0.202383270386109	0.161506141541001	0.210169486337843							1.22431716271075	0.892107384859475	1.68023776100029	0.263554755141346
mq66Ke	aGwo0E	outcome	RP4-673D20.3	Weighted median	152	-0.0447682	0.0386788870322116	0.247096158777396							0.956219148208996	0.886407256750071	1.03152930262996	0.304277064036484
K5epbQ	aGwo0E	outcome	RP4-669P10.19	Weighted median	563	0.20391529368828	0.021927299836655	1.4096438598671002e-20							1.22619428266188	1.17461188924644	1.28004188668418	7.20768325491766e-20
zAClyY	aGwo0E	outcome	RP4-669P10.16	Weighted median	6	-0.506907	0.257272486808355	0.0488027190059037							0.602355874555058	0.363796392636684	0.99735073506719	0.0692299202880613
i7Jt1K	aGwo0E	outcome	RP4-666F24.3	Weighted median	5	-1.52649	0.488822643894815	0.0017914907187391							0.217297561914539	0.0833605591186574	0.566433705738362	0.0031092575435751
26pDd6	aGwo0E	outcome	RP4-655J12.4	Weighted median	36	0.123059398219091	0.11152089228986	0.269825295228466							1.13095159546309	0.908898774065943	1.40725408348688	0.329010244352154
ZWdlhv	aGwo0E	outcome	RP4-639F20.1	Weighted median	4	0.426174772049439	0.528497286159668	0.420018179637364							1.53138839563467	0.543524818731818	4.31470714392832	0.486191291469451
4xP4ZX	aGwo0E	outcome	RP4-610C12.4	Weighted median	284	0.0066955503539009	0.029572902185052	0.820883877160093							1.00671801566238	0.95002465895584	1.06679458633538	0.857526139375372
6XkJUV	aGwo0E	outcome	RP4-607I7.1	Weighted median	93	0.278337239913893	0.0706855587671264	8.22725867135255e-05							1.32093159295893	1.15003634328271	1.51722185430803	0.0001650898700815
MI43hL	aGwo0E	outcome	RP4-594I10.3	Weighted median	23	-0.0286635	0.145685190464729	0.844023317045628							0.971743366333541	0.730368184908542	1.29288924343205	0.876527378697214
VigLmt	aGwo0E	outcome	RP4-575N6.5	Weighted median	99	-0.312051	0.0555049187274855	1.88704356396264e-08							0.731943874575142	0.656494421411871	0.816064566665918	5.10126474366326e-08
YOBlFg	aGwo0E	outcome	RP4-575N6.4	Weighted median	86	-0.434803	0.0844779396558514	2.64770908424392e-07							0.647392300579505	0.548603351055882	0.763970526324641	6.58700633945526e-07
FjG0Ua	aGwo0E	outcome	RP4-575N6.2	Weighted median	40	-0.331339	0.0828414217130752	6.34275739380001e-05							0.717961474556385	0.61035864342806	0.84453408581562	0.0001285332636801
u9lXPE	aGwo0E	outcome	RP4-561L24.3	Weighted median	260	-0.00490934	0.0248090004189395	0.843134766278881							0.995102693363129	0.947872785198646	1.0446859386632	0.875770296843605
0Xl9jv	aGwo0E	outcome	RP3-510O8.4	Weighted median	42	-0.102533	0.0832987201291338	0.218358446892266							0.902548545615476	0.766593740365899	1.06261483012345	0.272709314453033
nKGz6U	aGwo0E	outcome	RP3-508I15.9	Weighted median	258	0.0354790534737616	0.0247576559968645	0.151842457589632							1.03611594487094	0.987038777295793	1.08763330875103	0.196461067289123
S1R6hI	aGwo0E	outcome	RP3-508I15.19	Weighted median	132	0.0674772520025002	0.064578169829275	0.296072608671248							1.06980592337863	0.942616310542402	1.21415755371074	0.357223540423623
H19WOH	aGwo0E	outcome	RP3-508I15.14	Weighted median	450	0.0339499926045248	0.0233314095102521	0.145636138142744							1.03453287114013	0.988289537481106	1.08293998962819	0.189104584662811
B0RKiI	aGwo0E	outcome	RP3-476K8.3	Weighted median	15	-0.791759	0.169142669776557	2.85458091637121e-06							0.453047016708349	0.325211674663446	0.631132321927695	6.53922197029986e-06
IGWLK7	aGwo0E	outcome	RP3-475N16.1	Weighted median	88	0.42703587333542	0.0429958115094671	3.02029858774375e-23							1.53270764407323	1.40883635395713	1.66747026054666	1.7269885547489e-22
D27mUq	aGwo0E	outcome	RP3-467N11.1	Weighted median	223	1.24782966079502	0.101219173774164	6.401838924265621e-35							3.48277594376598	2.85605151048176	4.24702713867685	5.53500259670099e-34
AFEBVU	aGwo0E	outcome	RP3-467L1.6	Weighted median	65	-0.0381848	0.0949269097954939	0.68749673258185							0.962535069963188	0.799122106803129	1.15936444883921	0.740384555080027
biG15X	aGwo0E	outcome	RP3-455J7.4	Weighted median	316	0.106447425884357	0.0290246929144398	0.0002449545144889							1.11231944569724	1.05080761721671	1.17743203323302	0.0004684144718134
qWcFdA	aGwo0E	outcome	RP3-449O17.1	Weighted median	61	-0.357407	0.11702734734519	0.0022577546444496							0.699487599875055	0.556114643324499	0.879823806569796	0.0038691498785815
g4bTO3	aGwo0E	outcome	RP3-431A14.4	Weighted median	21	-1.11814	0.358707884243704	0.0018261720886624							0.32688680965418	0.161830017555523	0.660291507965923	0.0031658904339471
uMpljn	aGwo0E	outcome	RP3-414A15.11	Weighted median	9	-0.0533841	0.190434902315296	0.779226319225803							0.948015786955097	0.652700744628933	1.37694638731726	0.822109892980659
otAkyE	aGwo0E	outcome	RP3-412A9.11	Weighted median	2150	0.268180907245398	0.02112120524325	6.12558760190391e-37							1.30758366997916	1.25455803218423	1.36285051000741	5.6270435904957005e-36
EmpkeL	aGwo0E	outcome	RP3-399L15.3	Weighted median	49	-1.29514	0.150484008724869	7.533796662887e-18							0.273860155362545	0.203908005175148	0.367809908349484	3.4186842705667904e-17
BFvwiR	aGwo0E	outcome	RP3-395M20.3	Weighted median	73	-0.832526	0.0890719578458068	9.045340508071101e-21							0.434949256462783	0.365274211203629	0.517914623849713	4.6582607851583105e-20
TAXWF0	aGwo0E	outcome	RP3-395C13.1	Weighted median	275	-0.472778	0.0717329776859008	4.3745786920637e-11							0.623268526713773	0.541520439428445	0.717357329673402	1.39394550518591e-10
PyAs1g	aGwo0E	outcome	RP3-340N1.5	Weighted median	55	-0.5028	0.0965528028647663	1.91392301291275e-07							0.604834982771299	0.50055234137609	0.730843362710583	4.81115038960608e-07
viNTzs	aGwo0E	outcome	RP3-325F22.3	Weighted median	15	0.213486669054492	0.110749902174842	0.0538991021222007							1.23798699462092	0.996423272574704	1.53811321055393	0.0759210031118833
zhatAk	aGwo0E	outcome	RP3-322G13.5	Weighted median	32	0.666837202107839	0.221562496572213	0.0026150368436331							1.94806622706259	1.26184471377518	3.00747150865192	0.0044511667994076
DoJqXp	aGwo0E	outcome	RP1-95L4.4	Weighted median	83	0.148490401306822	0.0880290232413345	0.0916351623272698							1.16008166245305	0.976240328907377	1.37854319649553	0.12388965612474
KLU2vK	aGwo0E	outcome	RP1-92O14.6	Weighted median	136	0.0655160778390868	0.0321400135967473	0.0415041198620144							1.06770990364352	1.00252483322592	1.13713336623309	0.0595708318867837
i9REaR	aGwo0E	outcome	RP1-90J20.7	Weighted median	763	0.0478775397179768	0.0207723196821927	0.0211737385825715							1.04904218145676	1.00718951449109	1.09263399056693	0.0318683343649397
yKqbF9	aGwo0E	outcome	RP1-80N2.2	Weighted median	277	0.0677903826672083	0.0383630606353074	0.0772157677974173							1.07014096487167	0.992626105376666	1.15370901338719	0.105799050823602
H3afWx	aGwo0E	outcome	RP1-68D18.4	Weighted median	499	-0.371391	0.0178714706017029	6.4005257413234695e-96							0.689774158033121	0.666030958994618	0.714363773432559	2.18978651799587e-94
TG7QM8	aGwo0E	outcome	RP1-67K17.4	Weighted median	39	0.0784858304692396	0.103885196073416	0.449945771218342							1.08164802860868	0.882382932085577	1.32591238480526	0.516021796678036
TObvXZ	aGwo0E	outcome	RP1-5O6.6	Weighted median	304	-0.0327016	0.0213110939656241	0.124909394651216							0.967827277944046	0.928234036325756	1.00910934449279	0.164250700664201
J9NaDc	aGwo0E	outcome	RP1-59D14.5	Weighted median	88	-0.122622	0.0860799422085641	0.154299545488201							0.884598380671316	0.747262887903802	1.04717403708004	0.199358224906598
Y5tejC	aGwo0E	outcome	RP1-59D14.3	Weighted median	203	-0.17425	0.115105932258909	0.130071687792708							0.840087205429898	0.670415772043742	1.05269974567509	0.170421990983482
wdWa92	aGwo0E	outcome	RP1-43E13.2	Weighted median	130	0.550208256664556	0.0597628253498796	3.3683720386712903e-20							1.73361401694866	1.54198896523715	1.94905257269376	1.6959609032457998e-19
RmxQCA	aGwo0E	outcome	RP13-98N21.3	Weighted median	1312	0.0433108666376576	0.007785525390156	2.65178059243205e-08							1.04426247076121	1.02844837755036	1.06031973178635	7.1021314435607e-08
naIgEK	aGwo0E	outcome	RP13-977J11.8	Weighted median	19	0.0326357895603765	0.151850011404394	0.829828741053426							1.03317417788656	0.767213443472362	1.39133234816685	0.864913379908066
EzgzZH	aGwo0E	outcome	RP13-977J11.2	Weighted median	531	-0.0832772	0.0137831641959427	1.52263580020848e-09							0.920096083855342	0.895572431182304	0.945291272988734	4.4248692022176104e-09
zTt44S	aGwo0E	outcome	RP13-942N8.1	Weighted median	1244	0.0534325002420091	0.0197315698078587	0.0067696129533446							1.05488578482921	1.01486806966367	1.09648145635671	0.0109304568661662
b5PBOf	aGwo0E	outcome	RP13-941N14.1	Weighted median	27	0.727153898819123	0.177492446120367	4.18871516831812e-05							2.06918311471799	1.4612156180966	2.93010744561518	8.63308700293783e-05
AqCDSs	aGwo0E	outcome	RP13-890H12.2	Weighted median	166	-0.308522	0.0406441611066716	3.17940524741771e-14							0.734532064619584	0.678287401352479	0.795440624252332	1.20908442335599e-13
2BiLdI	aGwo0E	outcome	RP13-638C3.3	Weighted median	90	0.212737716994734	0.0623507518499778	0.0006449968027818							1.2370601488362	1.09475461620857	1.39786376707736	0.0011787798552764
crVYH7	aGwo0E	outcome	RP13-580F15.2	Weighted median	70	-0.109881	0.0890581516920339	0.217271602731335							0.895940439317278	0.752439022015225	1.06680973117818	0.271502946496424
Wqot0T	aGwo0E	outcome	RP13-578N3.3	Weighted median	1452	-0.00365398	0.0025065564134971	0.144904236557664							0.996352687524103	0.991469760022639	1.00125966314276	0.188213592708249
qPE4m8	aGwo0E	outcome	RP13-516M14.2	Weighted median	126	0.247307463290775	0.0436200128360784	1.43142043339784e-08							1.28057278137729	1.17563948033155	1.3948720469492	3.89987667077447e-08
E2xUT9	aGwo0E	outcome	RP1-34B20.4	Weighted median	167	0.321759778503253	0.0554800946893127	6.64917146960384e-09							1.37955333778191	1.23740790552322	1.5380275196969	1.85231204529626e-08
MP68Vb	aGwo0E	outcome	RP13-46H24.1	Weighted median	365	-0.0908216	0.0271592748839925	0.0008256895506147							0.913180608638725	0.865841183736809	0.96310829244093	0.0014904286188395
xegJ78	aGwo0E	outcome	RP13-467H17.1	Weighted median	626	0.271585114578488	0.0140447715152353	2.6180285770882097e-83							1.31204254105192	1.2764175467744	1.34866183395882	7.11432705136902e-82
qRrEi3	aGwo0E	outcome	RP13-452N2.1	Weighted median	79	-0.219634	0.118652788644101	0.0641605642920742							0.802812793708542	0.63623124333791	1.01300963838365	0.089164937346236
WFNrEv	aGwo0E	outcome	RP13-225O21.2	Weighted median	271	-0.450571	0.0251950889404315	1.59170599670656e-71							0.637264167925862	0.606558938420257	0.669523757707564	3.4428656460286395e-70
OjkyAD	aGwo0E	outcome	RP13-104F24.3	Weighted median	35	0.25909598108345	0.139923244094681	0.0640688010834358							1.29575816713251	0.984960660346515	1.70462567215621	0.0890449271345575
3osQdi	aGwo0E	outcome	RP13-1032I1.7	Weighted median	170	0.407659281136744	0.0537225244045669	3.24285804472441e-14							1.50329487298168	1.3530524759254	1.6702201247497	1.23255051533713e-13
zchuh1	aGwo0E	outcome	RP1-309F20.3	Weighted median	34	-0.574169	0.097633532091177	4.0813497203348e-09							0.563172477426352	0.465086873349318	0.681944078633068	1.15362696094347e-08
CBDmGJ	aGwo0E	outcome	RP1-29C18.9	Weighted median	72	-0.313898	0.101804787280687	0.0020469844746421							0.730593769645031	0.598436369984619	0.891936524943922	0.0035286358212339
BxRkXn	aGwo0E	outcome	RP1-29C18.10	Weighted median	189	0.541384236361068	0.0591937456848978	5.90969620994695e-20							1.71838386606739	1.53014804906637	1.92977608471442	2.94489330098859e-19
w2jZ3A	aGwo0E	outcome	RP1-28O10.1	Weighted median	366	-0.320722	0.0159657145965421	9.36689315757188e-90							0.725625067118017	0.70326982979858	0.748690923056983	2.87423989232002e-88
gTVwfn	aGwo0E	outcome	RP1-283E3.8	Weighted median	444	-0.383098	0.0242000914947713	1.9191360603695298e-56							0.68174622944627	0.650164437511337	0.714862109566093	2.9362365683008897e-55
tZFioA	aGwo0E	outcome	RP1-257I20.14	Weighted median	108	-0.0906815	0.0655215275197812	0.166359997947204							0.913308586354349	0.803238451902123	1.0384619560148	0.213555488595185
uM4tOL	aGwo0E	outcome	RP1-257I20.13	Weighted median	251	-0.0490374	0.0301582973887799	0.103949809916578							0.95214554769434	0.897495087183317	1.01012379559575	0.139035966517996
CmEL0P	aGwo0E	outcome	RP1-249I4.2	Weighted median	3	-0.195994	0.382683110078155	0.608539964316495							0.822016777450254	0.388270363310556	1.74031202548734	0.66830498737641
MR8vP9	aGwo0E	outcome	RP1-229K20.5	Weighted median	357	0.0553664642975627	0.028817055527426	0.0546927799736711							1.05693	0.99888565680582	1.11834274009481	0.0769446237908439
9soGgH	aGwo0E	outcome	RP1-1J6.2	Weighted median	38	0.458813286528677	0.25118164131975	0.0677569979072708							1.5821952580327	0.967052270732157	2.58863135975666	0.093817235639375
hwh6IZ	aGwo0E	outcome	RP1-199J3.5	Weighted median	930	0.0319019838066656	0.0127958070230404	0.012661206894402							1.03241630682932	1.00684552627256	1.05863650658816	0.0196729549993439
QK315R	aGwo0E	outcome	RP11-98D18.9	Weighted median	136	-0.0207738	0.0495515377220121	0.675043283153276							0.979440474916355	0.888789523234497	1.07933725457661	0.729421769851734
kpMEkH	aGwo0E	outcome	RP11-982M15.8	Weighted median	53	0.569722670877471	0.151390891653295	0.0001677154062598							1.76777672747766	1.31389567671294	2.37844953263698	0.0003261679414028
Ij5V5o	aGwo0E	outcome	RP11-981G7.1	Weighted median	246	-0.00514637	0.043613295127798	0.906067711117543							0.994866853958266	0.913357029090148	1.0836507801235	0.927239008437907
D6ly0f	aGwo0E	outcome	RP1-197B17.3	Weighted median	881	0.0556511996140646	0.0118528684213962	2.66388677212841e-06							1.05722885758345	1.03295081732472	1.0820775186587	6.12284678883453e-06
hK7URn	aGwo0E	outcome	RP11-977G19.11	Weighted median	93	-1.20212	0.136682196345379	1.43007984818638e-18							0.300555091642915	0.229920584746717	0.392889410976373	6.69353242443884e-18
jk8Wjs	aGwo0E	outcome	RP11-973N13.4	Weighted median	31	0.64389518457713	0.120723749832975	9.62713494090247e-08							1.90388242821812	1.50271975290337	2.41213858636942	2.47648709963762e-07
aMpg8f	aGwo0E	outcome	RP11-973H7.4	Weighted median	1080	-0.00536494	0.0169683180796734	0.751870357010076							0.994649422720425	0.962113505376122	1.02828561140644	0.798191749341774
3UsrtQ	aGwo0E	outcome	RP11-973H7.1	Weighted median	821	0.0704770931821878	0.0160315768419886	1.10191707021957e-05							1.07301998967578	1.03982788323932	1.10727161369919	2.39656654281565e-05
hMExnk	aGwo0E	outcome	RP11-96K19.4	Weighted median	49	0.134163488855061	0.106723656902299	0.208713424836292							1.1435797669091	0.927729682838867	1.40965057761443	0.261861776899312
RKDcC4	aGwo0E	outcome	RP11-96K19.2	Weighted median	129	-0.0341248	0.0814666848875055	0.675303357699079							0.966450866548611	0.823823047364273	1.13377172493641	0.729638959417541
2MKo6D	aGwo0E	outcome	RP11-96H19.1	Weighted median	1021	-0.0908263	0.0156143463352678	5.996747478515431e-09							0.913176328840833	0.88565268856496	0.941555327863782	1.67566355023245e-08
C25lms	aGwo0E	outcome	RP11-96B2.1	Weighted median	10	-0.190226	0.25834451833894	0.461530707490374							0.826771870848999	0.498285671233613	1.37180690894618	0.527568928992965
Z9XvTm	aGwo0E	outcome	RP1-193H18.2	Weighted median	22	-0.364027	0.121954328867896	0.002836310712344							0.694872618198355	0.547136361445656	0.882500213010966	0.0048069385290542
lMlQKM	aGwo0E	outcome	RP11-932O9.10	Weighted median	18	-0.157892	0.221621831099744	0.476192236115411							0.853941747115753	0.553069787017393	1.31848913931755	0.541958280519942
yTwNiT	aGwo0E	outcome	RP11-930P14.2	Weighted median	67	0.0159183886636087	0.075230068919359	0.832422157610029							1.01604576116996	0.876750739577088	1.17747147757116	0.867122503529883
FhqmAW	aGwo0E	outcome	RP11-930O11.2	Weighted median	551	-0.0875038	0.0265383079915912	0.0009763114502932							0.91621534532493	0.869776556045529	0.965133577324126	0.0017478787671259
I4nAdo	aGwo0E	outcome	RP11-91K8.1	Weighted median	16	0.517262136726423	0.21394285323545	0.0156164404425777							1.67742878637385	1.10289015120761	2.55126707793583	0.0239700182434805
qHjMZV	aGwo0E	outcome	RP11-90P13.1	Weighted median	124	-0.354707	0.0653608496756113	5.73403253629753e-08							0.701378931290676	0.617044431711326	0.79723984202258	1.4989068701556e-07
Wnu1xk	aGwo0E	outcome	RP11-90C4.1	Weighted median	39	-0.263422	0.128859836380056	0.0409289229439137							0.768417838592046	0.596911204746386	0.989202363720659	0.0587930792102281
ylFqlH	aGwo0E	outcome	RP11-902B17.1	Weighted median	21	0.384967050205566	0.18269807840941	0.0351070485688037							1.46956589874912	1.02724331030449	2.10234898499964	0.0509935763978774
Yk0Mji	aGwo0E	outcome	RP11-8H2.1	Weighted median	7	0.498233726507806	0.35863655559014	0.164758529317456							1.64581174828624	0.814896699830444	3.32397506501205	0.211653681355027
MjImHl	aGwo0E	outcome	RP1-18D14.7	Weighted median	91	0.362517546460351	0.0776872373883536	3.06564524086014e-06							1.43694243401837	1.23398721051512	1.67327792467209	7.00712833507048e-06
qIJzzx	aGwo0E	outcome	RP11-89H19.1	Weighted median	126	-0.347389	0.105614255362915	0.0010046298338152							0.706530254743333	0.574420716901261	0.869023324159608	0.0017961684887077
6ZTfFJ	aGwo0E	outcome	RP11-894P9.1	Weighted median	3	-1.02022	0.403347238689462	0.0114262075457491							0.360515214230136	0.163526257069055	0.79480336687775	0.0178754530346953
aeiQIE	aGwo0E	outcome	RP11-893F2.14	Weighted median	20	0.252087870611119	0.0939718601909422	0.0073054728585255							1.28670909623211	1.07026151444712	1.54693061086263	0.011745770027329
b3NMGK	aGwo0E	outcome	RP11-890B15.3	Weighted median	294	-0.0793149	0.0327781819798943	0.0155313794366546							0.92374903321775	0.866268744547237	0.985043361822686	0.0238476064742517
PtQj4n	aGwo0E	outcome	RP11-88H9.1	Weighted median	22	0.237514184014599	0.15237610232123	0.119058772105925							1.26809298331255	0.94068873374496	1.70944942427948	0.157348934441268
cF0JoK	aGwo0E	outcome	RP11-881M11.2	Weighted median	189	0.12485650608085	0.0332286747562831	0.0001716243048969							1.13298586481981	1.06154808852253	1.20923110668316	0.000333507278245
ny0B0E	aGwo0E	outcome	RP11-881L2.1	Weighted median	83	0.744767666513867	0.0596057913051283	7.96086589927861e-36							2.10595209494604	1.87374727392273	2.36693298393587	7.079939838380941e-35
QUJbbx	aGwo0E	outcome	RP11-87H9.2	Weighted median	16	-0.0768898	0.147746413199038	0.602772471147162							0.9259918463757	0.693174977100394	1.23700498125467	0.663091326729235
IWl94z	aGwo0E	outcome	RP1-187B23.1	Weighted median	28	0.456032699549068	0.268795846794415	0.0897767680784545							1.57780193733482	0.931641532402743	2.67212105393915	0.121593422342907
NZeDY0	aGwo0E	outcome	RP11-876N24.1	Weighted median	187	0.100019552266784	0.0208670438337826	1.64156050529317e-06							1.10519252688353	1.06090269667276	1.15133133821788	3.83968626689071e-06
EhMVNp	aGwo0E	outcome	RP11-875O11.1	Weighted median	117	0.101621721666958	0.0521948897012555	0.051538705234495							1.10696465177446	0.999319969178334	1.22620459719792	0.0728162740498114
T88Sq3	aGwo0E	outcome	RP11-874J12.4	Weighted median	205	0.103043389413266	0.0241370060987889	1.96259746065596e-05							1.10853950691132	1.05731730677164	1.16224318897733	4.17150119815801e-05
BzXJ28	aGwo0E	outcome	RP11-873E20.1	Weighted median	350	0.198929434623422	0.0609218915423676	0.0010934070458391							1.22009586633781	1.08276995103036	1.37483859949941	0.0019477729883384
jp2id0	aGwo0E	outcome	RP11-867G23.8	Weighted median	73	0.664350577611362	0.0814014126080862	3.31126823331235e-16							1.94322813561292	1.65666046653549	2.2793660278105	1.3930561571176901e-15
DlSU7i	aGwo0E	outcome	RP11-867G23.3	Weighted median	22	0.0938402752817685	0.126944899749067	0.459773100188668							1.09838429278377	0.856439390201882	1.40867884924083	0.525851845552049
W4wtSB	aGwo0E	outcome	RP11-864J10.4	Weighted median	59	-1.14272	0.097795152458167	1.5230282645935998e-31							0.318948967069712	0.263315415831309	0.386336832098003	1.1776829762986e-30
JLXbst	aGwo0E	outcome	RP11-863P13.4	Weighted median	217	0.527413540107202	0.0640764412430924	1.85648448820803e-16							1.69454376618276	1.49454784349021	1.92130254512502	7.89361418116371e-16
ZiR4Jc	aGwo0E	outcome	RP11-862G15.2	Weighted median	288	0.491733701436033	0.0475819641134831	4.92198223847567e-25							1.63514862349156	1.48954849682777	1.7949808459412	3.01191127525216e-24
ZGjM4p	aGwo0E	outcome	RP11-856B14.1	Weighted median	158	-0.46608	0.0388804508382633	4.13120979345603e-33							0.627457131673358	0.58141783811758	0.677142024679572	3.3768060460971005e-32
av3xt3	aGwo0E	outcome	RP11-84D1.1	Weighted median	46	0.0601850819337108	0.0999742902579244	0.547170414147982							1.06203309149458	0.873048187586906	1.2919267269165	0.610861881274355
EbacV9	aGwo0E	outcome	RP11-84A19.4	Weighted median	4	-0.214173	0.280845503883216	0.445700640230668							0.807208391528013	0.465505856261694	1.39974	0.511961420384471
02qPyQ	aGwo0E	outcome	RP11-849H4.2	Weighted median	15	0.255561154629083	0.325235157789525	0.432000218815333							1.29118597260275	0.682563473598154	2.44249989976408	0.498251548072417
R3mSmj	aGwo0E	outcome	RP11-848G14.2	Weighted median	48	0.28849617453276	0.107694095234181	0.007387579221071							1.33441924473603	1.08049119494301	1.64802335183842	0.0118704409112916
BS1agz	aGwo0E	outcome	RP11-840I19.3	Weighted median	28	0.747254697935041	0.132269341490858	1.60921885880977e-08							2.11119618237974	1.62906590903298	2.73601534215431	4.37054641461126e-08
7a9o19	aGwo0E	outcome	RP11-83N9.5	Weighted median	117	-0.159635	0.0629456960624506	0.011210053492967							0.852454506313761	0.753513005791173	0.964387714279253	0.0175589813796147
sboWQW	aGwo0E	outcome	RP11-830F9.6	Weighted median	152	0.0729913939980036	0.0384641581572385	0.0577425998031003							1.07572127921539	0.997604517767653	1.15995492196268	0.0809058015846327
z4wp2W	aGwo0E	outcome	RP11-830F9.5	Weighted median	157	0.0848629300584306	0.0470199564619516	0.0711016144558969							1.08856784654071	0.992730367931263	1.19365740668501	0.0980552454837584
WtLmZB	aGwo0E	outcome	RP11-82L18.2	Weighted median	19	1.6226963968022	0.262352151550931	6.20299745086282e-10							5.06673383904355	3.02976839638251	8.4731862099957	1.8488487666061902e-09
a219fr	aGwo0E	outcome	RP11-81N13.1	Weighted median	9	-2.01417	1.01780620105505	0.0478240260379398							0.133431641885666	0.0181503373412323	0.980918575869067	0.0679723340243488
TBHJLu	aGwo0E	outcome	RP11-81H14.2	Weighted median	465	-0.0573633	0.0089235013333507	1.29007301870593e-10							0.944250983584118	0.927879560700006	0.960911262370011	4.00436525151603e-10
7Y5Dxs	aGwo0E	outcome	RP11-818O24.3	Weighted median	40	0.213697848732587	0.138382285995092	0.122526024036351							1.23824845992303	0.944092215385561	1.62405665835894	0.161418737420238
YcD2ZQ	aGwo0E	outcome	RP11-815M8.1	Weighted median	696	0.120229010395249	0.0126603419330937	2.17051382307169e-21							1.12775508964747	1.10011502245556	1.15608960541865	1.1502885046257301e-20
ZUg1f1	aGwo0E	outcome	RP11-80H8.4	Weighted median	209	-0.371131	0.0327843887961268	1.0403251844034e-29							0.689953279493822	0.647013061689551	0.735743304225117	7.537056032421349e-29
XSXVfX	aGwo0E	outcome	RP1-180E22.3	Weighted median	45	-0.122367	0.125823613647278	0.330787250371871							0.884823434966227	0.691438239870968	1.13229564973371	0.394332171448915
gSsltZ	aGwo0E	outcome	RP11-802E16.3	Weighted median	351	0.0491697379417777	0.0261998958984651	0.0605571640297185							1.05039862811056	0.99782032093873	1.10574745250584	0.084525783312431
89HcUi	aGwo0E	outcome	RP11-800A3.5	Weighted median	16	0.239868143208511	0.15409278779833	0.119554214591361							1.27108153853788	0.939738418274388	1.71925319449915	0.157898114298695
TlC9L3	aGwo0E	outcome	RP11-7F17.4	Weighted median	136	-0.135663	0.028591110515903	2.08587154449707e-06							0.873137199750631	0.825553545693556	0.923463503445921	4.83454430742618e-06
FVvNZU	aGwo0E	outcome	RP11-7F17.3	Weighted median	259	-0.189398	0.0402391403492488	2.51625782153839e-06							0.827457191963093	0.764703868636049	0.895360194466747	5.79536993741076e-06
e1erxl	aGwo0E	outcome	RP11-799D4.4	Weighted median	284	-0.235683	0.0222894177455015	3.94418154868897e-26							0.790031355974722	0.756260109356212	0.825310677770089	2.5256565268941203e-25
v3ImKm	aGwo0E	outcome	RP11-799B12.2	Weighted median	44	0.40220949070377	0.119003753287325	0.000725372516369							1.49512451455733	1.18407530218828	1.88788441908979	0.0013182114558095
in0MaO	aGwo0E	outcome	RP11-798K23.5	Weighted median	282	0.0883769001731011	0.0199819885854333	9.7417259015515e-06							1.09239977011066	1.05044323381929	1.13603212369599	2.12913858040324e-05
gID97u	aGwo0E	outcome	RP11-798G7.6	Weighted median	256	0.332357296650625	0.0204168298662246	1.40048429527353e-59							1.39425092071155	1.33955880548852	1.45117603045138	2.3139841350969202e-58
4MMmH6	aGwo0E	outcome	RP11-797A18.6	Weighted median	1426	0.0655147885285473	0.0101359855859808	1.02252113915375e-10							1.06770852703478	1.04670617439823	1.08913229575452	3.19294683253984e-10
iXvGPC	aGwo0E	outcome	RP11-797A18.3	Weighted median	1776	0.0533659328539066	0.0082240019238589	8.63811691231818e-11							1.05481556617493	1.03794924754514	1.07195595668712	2.7090007606123e-10
Hfutum	aGwo0E	outcome	RP11-796G6.2	Weighted median	518	0.404353743552899	0.0331710014027138	3.5152066164495197e-34							1.49833387917241	1.40401863850446	1.59898476552076	2.9650290673118598e-33
LtGgwZ	aGwo0E	outcome	RP11-78O7.2	Weighted median	565	0.227938833954214	0.0138470709242769	6.975217712406041e-61							1.25600849800946	1.22237852935906	1.29056369134621	1.19031668616924e-59
SQVaGM	aGwo0E	outcome	RP11-77H9.2	Weighted median	431	-0.0405757	0.0197202166250028	0.0396314858314853							0.960236457990726	0.923829877983907	0.998077760016587	0.0570537720235704
M583nv	aGwo0E	outcome	RP11-76E17.4	Weighted median	410	0.169795604938082	0.0092514236667351	3.09762843844382e-75							1.18506260561964	1.16376776471201	1.2067471035216	7.21169357890858e-74
sPt1VZ	aGwo0E	outcome	RP11-767N6.2	Weighted median	1408	-0.0762068	0.0073489191767339	3.4025975563308204e-25							0.92662458555997	0.913373259128501	0.940068163790403	2.09729915253165e-24
gurNTx	aGwo0E	outcome	RP11-764K9.1	Weighted median	47	-0.0351572	0.0708433554449878	0.619706000953977							0.965453611878098	0.840288326137284	1.10926291333028	0.678757023946998
7OFvDZ	aGwo0E	outcome	RP11-762H8.2	Weighted median	115	0.095770819012533	0.0745015338296568	0.198621848254088							1.10050681985061	0.950989566772369	1.27353159577576	0.250383137772307
7iG9bd	aGwo0E	outcome	RP11-757G1.6	Weighted median	571	-0.0436058	0.0079852571373363	4.74029841757057e-08							0.957331278059529	0.942464629875831	0.972432436081805	1.246393968403e-07
uhrySM	aGwo0E	outcome	RP11-752G15.8	Weighted median	161	-0.105998	0.04792308879894	0.0269785550220614							0.899426782131449	0.818790619746552	0.988004157480138	0.0399347282023939
hs6vpv	aGwo0E	outcome	RP11-73M18.6	Weighted median	421	-0.535709	0.0299933477544877	2.37683802427916e-71							0.585254302175099	0.551840743086551	0.620691028173577	5.1276388171818e-70
U5DUVJ	aGwo0E	outcome	RP11-73M18.10	Weighted median	401	-0.211579	0.0229598564047405	3.10818200480118e-20							0.80930556973296	0.773693	0.846557289350138	1.56719244318425e-19
wc9mlC	aGwo0E	outcome	RP11-73G16.2	Weighted median	207	-0.0604137	0.042754511138268	0.157644724989385							0.941374983911935	0.865703709773822	1.02366069398816	0.203255013405292
0RS7ml	aGwo0E	outcome	RP11-737O24.3	Weighted median	33	-0.233682	0.154860491717794	0.131302265454725							0.791613214826595	0.584377012355799	1.07234108912306	0.171892991500643
jnuSu2	aGwo0E	outcome	RP11-737O24.2	Weighted median	3	-0.346045	0.437461601295077	0.428926192545608							0.707480317277724	0.300150816646844	1.66758966351342	0.495041249628096
sJi0Sb	aGwo0E	outcome	RP11-736N17.4	Weighted median	51	-0.0121727	0.0578960501797435	0.833471485054307							0.987901063815042	0.881924363395745	1.1066124855981	0.86795935447171
4oUZlF	aGwo0E	outcome	RP11-731F5.1	Weighted median	8	0.624002773634959	0.466503046972338	0.181021062958853							1.86638382194671	0.748006808758462	4.65689420208101	0.230441753590915
lmZYT9	aGwo0E	outcome	RP11-730A19.9	Weighted median	11	0.448905373978601	0.169785017030451	0.0081941511549522							1.56659640940015	1.12313821032249	2.18514897577989	0.0130953207229354
mws2jx	aGwo0E	outcome	RP11-728F11.1	Weighted median	104	0.0330388644955963	0.0287183485784459	0.249960864739986							1.03359070844226	0.9770190792584	1.09343796375918	0.307322099466167
oEvBtj	aGwo0E	outcome	RP11-723D22.3	Weighted median	17	0.769354873785488	0.208487910652359	0.0002241082916896							2.15837338129497	1.43435973064316	3.2478433084522	0.0004300159993142
5O957T	aGwo0E	outcome	RP11-720N19.1	Weighted median	30	-0.450049	0.222510797134226	0.0431148511485334							0.637596669840249	0.412231358756335	0.986168336678311	0.0617338489780888
yniPVe	aGwo0E	outcome	RP11-71H17.7	Weighted median	606	0.142015269436386	0.01446800091156	9.625375402980291e-23							1.15259424786719	1.12036887935694	1.18574652035947	5.39202200967723e-22
W5KUaM	aGwo0E	outcome	RP11-71G12.1	Weighted median	62	0.263236021330614	0.0936802198532661	0.0049550367853659							1.30113377803965	1.08287851847239	1.5633786057036	0.0081491954561548
7XR9sC	aGwo0E	outcome	RP11-719K4.2	Weighted median	157	0.172660491080301	0.0384944173663586	7.27982795765284e-06							1.18846254294738	1.10209336794241	1.2816003226895	1.6091514120444e-05
AehmEX	aGwo0E	outcome	RP11-718G2.4	Weighted median	504	0.429634707843671	0.0218934803532757	9.67124293502345e-86							1.53669607798475	1.47214936559524	1.60407285516092	2.76018726007489e-84
9oKOdZ	aGwo0E	outcome	RP11-715J22.3	Weighted median	108	-0.322555	0.0569454340195467	1.47637928466864e-08							0.724295928943999	0.647803234533997	0.809820891157219	4.01926300768638e-08
AM538S	aGwo0E	outcome	RP11-713P17.3	Weighted median	288	0.104725746945116	0.0888510164067635	0.238530863822267							1.11040603634481	0.932932670546349	1.32164046182337	0.29502391571518
l6cas5	aGwo0E	outcome	RP11-713N11.3	Weighted median	190	0.357621274360585	0.0380205089237003	5.15330313758116e-21							1.42992396904824	1.32723930823269	1.54055304463617	2.68383549342106e-20
MSx8vW	aGwo0E	outcome	RP11-70P17.1	Weighted median	18	-0.169449	0.152376667241772	0.26612210216156							0.844130191016659	0.626186637518507	1.13792875269517	0.325032268117569
yUKUUw	aGwo0E	outcome	RP11-70C1.1	Weighted median	586	-0.0335229	0.0136791912658902	0.0142597955671168							0.967032736859022	0.941449900299602	0.993310758075871	0.0219977105512028
ke877f	aGwo0E	outcome	RP11-707P17.2	Weighted median	73	-0.390347	0.0665176921214315	4.40246349161867e-09							0.676822133544857	0.594091789039728	0.771073105044345	1.24126757148977e-08
G7wTiW	aGwo0E	outcome	RP11-705O3.1	Weighted median	1386	-0.00340106	0.0067450049225707	0.614096995133726							0.996604716669761	0.983516101128219	1.00986751528426	0.67364405921022
EhXOFy	aGwo0E	outcome	RP11-701P16.5	Weighted median	176	-0.130451	0.0415700234609736	0.0017005168282261							0.877699898964628	0.80902311462701	0.952206554688715	0.0029601012249341
tk9zG2	aGwo0E	outcome	RP11-701P16.2	Weighted median	106	0.332822489883546	0.0665895549614045	5.78923914094077e-07							1.39489966768952	1.22422374080336	1.58937048683885	1.40488152706502e-06
rvkh15	aGwo0E	outcome	RP11-6I2.3	Weighted median	49	-0.828961	0.160932739913159	2.59135244919751e-07							0.436502761652978	0.318418492530988	0.598378126270837	6.45069963961022e-07
k5Fso6	aGwo0E	outcome	RP11-6F2.4	Weighted median	9	-0.219664	0.20252875248119	0.278096375629292							0.802788635515281	0.539765672680705	1.19398032503952	0.337902930352785
F5BP5U	aGwo0E	outcome	RP11-69H7.2	Weighted median	4	1.80641156429875	0.973192284675374	0.0634291489872282							6.08855977921893	0.903892073295262	41.0121531987515	0.0882105125384538
3arvot	aGwo0E	outcome	RP11-697N18.4	Weighted median	17	-0.42509	0.2270604388486	0.0611867989530133							0.653711177516255	0.418897880883763	1.02014911774707	0.0853226664975645
xnNIS8	aGwo0E	outcome	RP11-692N5.1	Weighted median	275	-0.0893847	0.0258582353529613	0.0005467891435944							0.914493677944716	0.86930010718687	0.962036792687384	0.0010068966773892
sGOoOy	aGwo0E	outcome	RP11-690G19.3	Weighted median	21	0.822383921029656	0.325147980546983	0.0114303177850381							2.27591898668829	1.20333140256355	4.30455585463265	0.0178813169580189
6F3bmp	aGwo0E	outcome	RP11-68I3.4	Weighted median	13	0.0933959681876638	0.151851926619718	0.538524132979558							1.09789638124974	0.815271731859192	1.47849657587472	0.602693694166439
E8ju0A	aGwo0E	outcome	RP11-689B22.2	Weighted median	213	-0.158536	0.0580391660858277	0.0063041629795713							0.853392639930789	0.761631605002488	0.956209003282712	0.0102250423086694
EDN6VF	aGwo0E	outcome	RP11-686D22.8	Weighted median	154	0.0626438230935398	0.0611434797332103	0.305581195927698							1.0646475688141	0.944407627559779	1.2001961999296	0.367359236462248
OnrZ7d	aGwo0E	outcome	RP11-686D22.7	Weighted median	161	-0.170165	0.0464561062451639	0.0002493492433557							0.843525333485897	0.770112006353323	0.923937014826964	0.0004765416119731
JdyLRv	aGwo0E	outcome	RP11-685N10.1	Weighted median	932	0.0770607320714303	0.0074456232885752	4.1934906173446805e-25							1.08010767157698	1.06445966161604	1.09598571394268	2.57675394239651e-24
zR2rre	aGwo0E	outcome	RP11-680G24.4	Weighted median	46	-0.170363	0.173829928531453	0.327058839569309							0.843358675262403	0.599853634164834	1.18571	0.390442361664439
LlgUaM	aGwo0E	outcome	RP11-680A11.5	Weighted median	210	-0.478267	0.0420247016047869	5.2223611591168196e-30							0.619856422378478	0.570845993300378	0.673074680164514	3.82222679027923e-29
MAwQ6D	aGwo0E	outcome	RP11-677M14.7	Weighted median	58	0.0347999912089079	0.0470225440086949	0.459257300742592							1.03541259646647	0.944250115520909	1.13537634499521	0.525347050768414
EI3Eyr	aGwo0E	outcome	RP11-677M14.5	Weighted median	67	0.0304905422654819	0.035170122251791	0.385972447497108							1.03096013945537	0.96228665229078	1.10453450291096	0.451510627573868
D4oPAD	aGwo0E	outcome	RP11-677M14.2	Weighted median	18	0.113610921718451	0.143101599724488	0.427243227544958							1.12031614939316	0.846311136166431	1.48303410052765	0.493294782892483
KcfZfb	aGwo0E	outcome	RP11-66N24.4	Weighted median	23	-0.381795	0.177710657559607	0.0316812605270766							0.682634831432271	0.481856896115802	0.96707200175169	0.046373420456258
EZmAAt	aGwo0E	outcome	RP11-66N24.3	Weighted median	6	-0.496379	0.456400457892564	0.276774077652993							0.608731063196884	0.248845362338784	1.48909147358884	0.336478326606069
zcCBi1	aGwo0E	outcome	RP11-66D17.5	Weighted median	82	0.0005496375564325	0.0537645296575486	0.991843327107903							1.00054978863483	0.900478634804743	1.11174195682531	0.993988607132952
0kgHS8	aGwo0E	outcome	RP11-658F2.8	Weighted median	47	0.188055663233893	0.192828958804187	0.329438268732449							1.2069006934755	0.82705085208656	1.76120885461489	0.392912915604973
RWTzGx	aGwo0E	outcome	RP11-656D10.6	Weighted median	50	0.292780753494979	0.124424039646132	0.0186182116889972							1.34014893524924	1.05012545269395	1.71027105765532	0.0282527187637157
w1uzpC	aGwo0E	outcome	RP11-656D10.3	Weighted median	513	-0.0227307	0.0141795318255753	0.108919888766055							0.977525658978226	0.950732422622901	1.00507397373133	0.145110006599143
zseOeW	aGwo0E	outcome	RP11-64P12.8	Weighted median	14	1.77043695968096	0.394201093359901	7.08221548347545e-06							5.87341924814808	2.71231582161423	12.7186713986668	1.56680261309452e-05
wHeV9L	aGwo0E	outcome	RP11-649A18.7	Weighted median	67	0.204593551546349	0.0613820014680477	0.0008587802060375							1.22702624067875	1.08793872582141	1.38389539739702	0.0015471071188007
z6euaG	aGwo0E	outcome	RP11-645C24.2	Weighted median	127	-0.10678	0.0999639894180559	0.285438033530407							0.898723531806275	0.738813882928769	1.09324419219152	0.34571808993853
MHylb9	aGwo0E	outcome	RP11-644F5.10	Weighted median	1758	0.344123409187257	0.0319705816582448	5.1048547140198796e-27							1.41075272461253	1.32506440941651	1.50198227033964	3.35365874250963e-26
x8VeS8	aGwo0E	outcome	RP11-63P12.6	Weighted median	801	-0.011244	0.0249473479442354	0.652198583038566							0.988818958835594	0.941631922836197	1.03837063043454	0.708642706911549
lWV8pW	aGwo0E	outcome	RP11-63N8.3	Weighted median	123	0.449448495631564	0.067771869355998	3.3165046534309494e-11							1.56744749293158	1.37247493466251	1.79011767796083	1.06531391023049e-10
475viu	aGwo0E	outcome	RP11-63D14.1	Weighted median	865	0.147149977997943	0.0127496107006954	8.146589159147661e-31							1.15852770366645	1.12993571420805	1.18784318725899	6.1267459922267e-30
r8JHPA	aGwo0E	outcome	RP11-637A17.2	Weighted median	355	0.152999830449591	0.0416782698134417	0.0002416282482585							1.16532478136143	1.07391454041793	1.26451574584936	0.0004622864359351
1irbh5	aGwo0E	outcome	RP11-632K20.2	Weighted median	70	-0.295256	0.222482812207036	0.184476322712774							0.744340671212891	0.481271957012475	1.15120573045833	0.23433254591825
7heVca	aGwo0E	outcome	RP11-632F7.1	Weighted median	223	0.0172896319179554	0.0257645047742099	0.502179752318815							1.01743996274236	0.967336561104293	1.0701384806581	0.567689952492024
o9pv70	aGwo0E	outcome	RP11-631N16.2	Weighted median	85	-0.457078	0.0681054050150264	1.92859591829281e-11							0.633131089384241	0.554014521838314	0.723545973153863	6.288589806047109e-11
Fc4itV	aGwo0E	outcome	RP11-62J1.3	Weighted median	50	0.118687251349002	0.0731122619652434	0.104513259911768							1.12601770269623	0.975687642608814	1.29951001879568	0.139721507263654
FVlOcp	aGwo0E	outcome	RP11-629O1.2	Weighted median	233	-0.197001	0.0595567809043401	0.0009403491670979							0.82118949074104	0.730714335197141	0.922867045603524	0.001686919274561
UJiGTQ	aGwo0E	outcome	RP11-622O11.2	Weighted median	78	-0.307659	0.0627116148362823	9.29841309247672e-07							0.735165968082341	0.650135963452424	0.83131687986677	2.2192835499668e-06
OFjAlJ	aGwo0E	outcome	RP11-61O1.1	Weighted median	529	0.216601074610806	0.0320122926052859	1.3222301171805e-11							1.24184859837439	1.16632406846951	1.32226366837148	4.3495894579217094e-11
88FQZC	aGwo0E	outcome	RP11-61L23.2	Weighted median	24	0.24582763808266	0.121093248599756	0.0423495361572797							1.27867915895524	1.00852096936854	1.62120614365631	0.060703131630537
Nl5meO	aGwo0E	outcome	RP11-61L19.1	Weighted median	331	0.278620151177451	0.0432226629752499	1.14720429289051e-10							1.32130535225283	1.21397940965252	1.43811980665446	3.57077455151651e-10
NOM8VD	aGwo0E	outcome	RP11-61J19.4	Weighted median	154	-0.0484902	0.0550223962248975	0.378166024686803							0.952666709540987	0.85527342935391	1.06115	0.443344473602329
qBHGEz	aGwo0E	outcome	RP11-61A14.3	Weighted median	124	-0.542951	0.063429975664623	1.1300852956572401e-17							0.581030829184897	0.513105288792142	0.657948440286004	5.0809613998320503e-17
PbsYu2	aGwo0E	outcome	RP11-616K22.1	Weighted median	228	2.38688305237688	0.129000199454476	1.95509192896885e-76							10.8795301132731	8.44895412438137	14.0093286983354	4.67283050637872e-75
Ex8WKl	aGwo0E	outcome	RP11-615I2.7	Weighted median	296	-0.601075	0.0256069260218592	7.676706617403501e-122							0.548222250489765	0.521386284655909	0.576439474487539	4.01325224359349e-120
lHNQER	aGwo0E	outcome	RP11-613D13.7	Weighted median	13	-0.907109	0.16741184464541	6.0125542842224e-08							0.40368963474692	0.290766092001842	0.560468794968945	1.56938880595678e-07
aeQWtI	aGwo0E	outcome	RP11-613C6.2	Weighted median	3	-0.353662	0.907590765207547	0.696780046949274							0.702112556295329	0.118535895221699	4.15875748679813	0.749066740089603
llrl7z	aGwo0E	outcome	RP11-612B6.2	Weighted median	80	-0.285952	0.0908665052659178	0.0016498330392405							0.751298431390481	0.628731690926616	0.897758680142114	0.0028771471508913
577oh9	aGwo0E	outcome	RP11-60I3.5	Weighted median	313	-0.170881	0.0737668636707352	0.020530960223942							0.842921898434062	0.729450312369059	0.97404485927508	0.0309716641101532
UXYrix	aGwo0E	outcome	RP11-605F22.2	Weighted median	472	-0.00382933	0.0058464387025252	0.512477150439375							0.996177990515977	0.984827921670775	1.00765886806385	0.577704704236313
ayJRRt	aGwo0E	outcome	RP11-600F24.7	Weighted median	607	-0.279768	0.0177816094352377	8.90587832724867e-56							0.755959079517858	0.730066256680385	0.782770227600961	1.33935192389974e-54
btXvEX	aGwo0E	outcome	RP11-5K23.5	Weighted median	52	0.299549678188592	0.110417131971743	0.0066698978941947							1.34925107356084	1.08668534968458	1.6752581232769	0.0107779074891866
MriG9D	aGwo0E	outcome	RP1-159A19.4	Weighted median	129	1.05837179619248	0.0957441580817187	2.09273263276864e-28							2.88167521291118	2.38861391626328	3.47651496801853	1.44759549505278e-27
xVfzTR	aGwo0E	outcome	RP11-597D13.9	Weighted median	1111	-0.166101	0.0108935910629601	1.70875722359876e-52							0.846960865443666	0.829068723830935	0.86523913756921	2.37997556011981e-51
vvirbG	aGwo0E	outcome	RP11-58E21.4	Weighted median	124	-0.160542	0.0412518114050625	9.95172046689145e-05							0.851681714162379	0.785530536164859	0.923403621939322	0.0001979645042181
z0eosn	aGwo0E	outcome	RP11-58E21.3	Weighted median	340	-0.0396627	0.0311479252989421	0.20288832635738							0.961113570360922	0.904192832341904	1.02161758210291	0.255233938199527
2P8Idg	aGwo0E	outcome	RP11-588L15.2	Weighted median	14	0.460226996607734	0.169528022485279	0.0066324876268724							1.58443360523022	1.13649853189994	2.20891605129134	0.0107230679134201
QnTqtA	aGwo0E	outcome	RP11-586D19.1	Weighted median	19	1.37763636330576	0.258977988491822	1.04046291715272e-07							3.96551749885633	2.38700515235723	6.5878906956722	2.66967848219051e-07
VKTis8	aGwo0E	outcome	RP11-585P4.5	Weighted median	859	0.0900646903902016	0.0039158139812014	4.634774572300391e-117							1.0942450685561	1.08587888894785	1.1026757055932	2.25144314843025e-115
kVCqRR	aGwo0E	outcome	RP11-583F2.1	Weighted median	17	-0.0296843	0.134979170947562	0.825935077395052							0.970751913772553	0.745095028284694	1.2647504577537	0.861673155985719
Kumwtt	aGwo0E	outcome	RP11-582J16.5	Weighted median	152	-0.190533	0.0383553200628816	6.77904769790984e-07							0.826518099554747	0.766661511223824	0.891047951267445	1.63604770414244e-06
7b29RB	aGwo0E	outcome	RP11-57K17.1	Weighted median	102	0.740433198629896	0.133164507887778	2.69327707342165e-08							2.09684366757873	1.61515473490199	2.72218708910996	7.20897043171965e-08
se0m1M	aGwo0E	outcome	RP11-57H14.4	Weighted median	127	-0.0463038	0.0625271786095376	0.45897329785423							0.954751879572404	0.844629630931643	1.07923179363431	0.525034335190973
JkxpW8	aGwo0E	outcome	RP11-57H12.5	Weighted median	372	0.0507171552838691	0.0340119632010207	0.135920447805638							1.05202529140272	0.984180176404002	1.12454735452491	0.177379487609413
MxrC04	aGwo0E	outcome	RP11-578F21.9	Weighted median	27	0.232220663716669	0.0646375117841188	0.0003273183717117							1.26139804290064	1.11130071057693	1.43176820413219	0.0006177845087937
q98Zzy	aGwo0E	outcome	RP11-575A19.2	Weighted median	128	0.325820909915071	0.0653120518986227	6.07933337579111e-07							1.38516727693278	1.21872994546782	1.57433432420409	1.47253043128166e-06
Ey0ZQD	aGwo0E	outcome	RP11-574K11.5	Weighted median	80	-0.241783	0.08332972119215	0.0037135417892821							0.785226509156389	0.666903907833361	0.924541996889893	0.0062034254756172
8qXqsm	aGwo0E	outcome	RP11-573D15.9	Weighted median	10	0.308457356090395	0.126567193988525	0.0148054395320372							1.36132345615538	1.06224612901945	1.74460654800363	0.0227967314695724
g0bMZh	aGwo0E	outcome	RP11-572C15.5	Weighted median	78	-0.362203	0.108974982371774	0.000888228955013							0.696140924408981	0.562258187065972	0.861903299560365	0.001598178062589
wqjBhE	aGwo0E	outcome	RP11-56B16.2	Weighted median	57	0.786926441459952	0.186467667314614	2.44111274671992e-05							2.19663455517935	1.52416971638781	3.16579139260386	5.14344236048126e-05
XiY1J9	aGwo0E	outcome	RP11-569A11.1	Weighted median	159	0.237666697022454	0.0461351816235329	2.5837212874419e-07							1.26828639873648	1.15863401857104	1.38831620981041	6.43299983688602e-07
bATFtz	aGwo0E	outcome	RP11-568N6.1	Weighted median	146	-0.384993	0.0319452367200973	1.90094917669911e-33							0.68045542408471	0.639156700058676	0.724422640212951	1.56965723176443e-32
2SEzSy	aGwo0E	outcome	RP11-568K15.1	Weighted median	88	-0.12758	0.0945692336711363	0.177316703476408							0.880223116388926	0.731297035619148	1.05947747206367	0.226122279345508
QLQCoF	aGwo0E	outcome	RP11-564D11.3	Weighted median	3	0.42294009272811	0.811153409270761	0.602084111531268							1.52644284820056	0.311324161581841	7.48424971895449	0.662481600079718
tuFXfk	aGwo0E	outcome	RP11-563N6.6	Weighted median	218	0.41020105625377	0.0239076734562373	5.50364177699683e-66							1.5071207707094	1.43812763820254	1.57942379881012	1.05304575797434e-64
RDYdYE	aGwo0E	outcome	RP11-555K12.2	Weighted median	7	-0.264033	0.208057923814443	0.204429054247999							0.767948572168477	0.510775029002341	1.15460814646227	0.25702818738742
aAu3g1	aGwo0E	outcome	RP11-554I8.1	Weighted median	371	-0.0972288	0.0423707123318971	0.0217493527541416							0.907348389863644	0.835040220956277	0.985917899434037	0.0326809195849157
cMRHBo	aGwo0E	outcome	RP11-553L6.5	Weighted median	40	0.82510744332587	0.155199922838057	1.05830705749913e-07							2.28212595135954	1.68356841031862	3.09348810891683	2.71306852584865e-07
xOOpg0	aGwo0E	outcome	RP11-552F3.4	Weighted median	80	0.347939731634714	0.0716860532388931	1.2120344609591e-06							1.41614689830949	1.23051781338529	1.62977895628695	2.86498270214175e-06
5MvjJa	aGwo0E	outcome	RP11-552F3.10	Weighted median	298	0.123404066962622	0.0265298967239823	3.29514072745517e-06							1.13134146631279	1.07401661844949	1.19172598581068	7.51360829679996e-06
sfqueS	aGwo0E	outcome	RP11-552D4.1	Weighted median	92	0.133778530593438	0.0614690104832337	0.0295285529403266							1.14313962115431	1.01338809868673	1.28950418417808	0.0434489680092614
i1l3He	aGwo0E	outcome	RP11-551L14.1	Weighted median	344	-0.44586	0.066672091822952	2.27229386785331e-11							0.64027314146928	0.561840256777526	0.729655254748451	7.374245152306189e-11
yzzoYg	aGwo0E	outcome	RP11-54F2.1	Weighted median	24	0.28324466326695	0.131683052341927	0.0314795458513394							1.32742989542521	1.0254647050986	1.71831377375309	0.046097282025483
9gPpMg	aGwo0E	outcome	RP11-545E17.3	Weighted median	327	0.210350120060188	0.041504682535055	4.01794179839178e-07							1.2341100710168	1.13769119620195	1.33870040699054	9.86376359898375e-07
ApeRPf	aGwo0E	outcome	RP11-544A12.5	Weighted median	12	-0.132317	0.199496637545545	0.507169056450727							0.876063606872908	0.59254409329085	1.29524106640693	0.572596391421803
bDInMu	aGwo0E	outcome	RP11-542M13.2	Weighted median	25	-0.303041	0.0819341068273544	0.0002167976897075							0.738568861998546	0.628995117286151	0.867230839990238	0.00041658717482
6P0W0Q	aGwo0E	outcome	RP11-541N10.3	Weighted median	249	0.418178347201152	0.0583054029607759	7.37989071582071e-13							1.51919159381143	1.35513320720216	1.70311161031347	2.61035828047319e-12
rCDppu	aGwo0E	outcome	RP11-540B6.2	Weighted median	729	-0.133363	0.0055028573479151	9.46519109487167e-130							0.875147352000173	0.865759082441299	0.884637427716323	5.56677185309458e-128
Lh8H6m	aGwo0E	outcome	RP1-153P14.8	Weighted median	802	0.0549249470184299	0.0047257033770537	3.1636976850785403e-31							1.05646132112786	1.04672115456579	1.06629212390593	2.41495915846624e-30
bGkwHg	aGwo0E	outcome	RP1-153P14.5	Weighted median	784	0.0560543972658595	0.0045594713869281	9.74888031418055e-35							1.05765521572376	1.04824552008127	1.06714937857398	8.37898284901639e-34
41ovyc	aGwo0E	outcome	RP1-153P14.3	Weighted median	728	0.0648315547293193	0.0056588784506795	2.1788062515686697e-30							1.0669792816323	1.05521037324209	1.07887945029839	1.61718096824289e-29
iuG9Nj	aGwo0E	outcome	RP11-53B2.3	Weighted median	74	-0.234593	0.076929221206617	0.0022924609806627							0.790892444388531	0.680195808729275	0.919604105999169	0.0039252226745116
0AMntr	aGwo0E	outcome	RP11-53B2.2	Weighted median	252	-0.112128	0.0145477130977163	1.28227060870006e-14							0.893930143522171	0.868801013049492	0.919786106939136	4.9860696482966403e-14
l2DYmC	aGwo0E	outcome	RP11-539L10.3	Weighted median	155	0.140032877193491	0.0271902390457076	2.60325808009508e-07							1.15031161725316	1.09061309289963	1.21327794925835	6.47968354146198e-07
dVT4p5	aGwo0E	outcome	RP11-536C5.7	Weighted median	43	-0.521316	0.0968275469130828	7.28617025286905e-08							0.593738461714997	0.491104497153006	0.717821488020014	1.88984443220712e-07
WznKP9	aGwo0E	outcome	RP11-535A19.2	Weighted median	126	-0.105749	0.0554083052234753	0.0563206609363877							0.899650153943721	0.807066195603138	1.00285503704699	0.079043482066997
ueS3v5	aGwo0E	outcome	RP11-534L20.4	Weighted median	176	-0.0826695	0.0402804424347825	0.0401358871117039							0.920655399467053	0.85076516610248	0.996287105231269	0.0577277637993336
pckaih	aGwo0E	outcome	RP11-532F12.5	Weighted median	83	-0.268686	0.0782799421045385	0.0005983180849994							0.764383103701105	0.6556587278203	0.891136660631584	0.0010976941604734
W9uxi8	aGwo0E	outcome	RP1-152L7.5	Weighted median	430	-0.265341	0.0337238550874971	3.60202403328841e-15							0.766944311360905	0.71788934169765	0.819351315814052	1.43787001710203e-14
dBgBlk	aGwo0E	outcome	RP11-529F4.1	Weighted median	9	-0.232368	0.0932637832010419	0.0127198455453857							0.792654046354023	0.660231051670131	0.951637211870068	0.0197590959808412
5qxHKD	aGwo0E	outcome	RP11-528G1.2	Weighted median	77	0.282884	0.0488865350406038	7.18531483953345e-09							1.32695075273507	1.20570690037503	1.46038668239892	1.99660334674319e-08
5Kn6V9	aGwo0E	outcome	RP11-526I2.5	Weighted median	1154	0.0133339732889891	0.0055384016066438	0.0160600065672203							1.01342326715009	1.00248178067179	1.0244841733811	0.0246072792370556
y77XWR	aGwo0E	outcome	RP11-521I2.3	Weighted median	12	0.0703302832456099	0.194344358407965	0.717438065335738							1.07286247124207	0.73301826502003	1.57026630457589	0.767592696086225
TZVt2m	aGwo0E	outcome	RP11-521D12.5	Weighted median	164	-0.147416	0.0408493632707298	0.0003076536564598							0.862935002093155	0.796537827205615	0.934866860560648	0.0005823153745099
NwKPLo	aGwo0E	outcome	RP11-519C12.1	Weighted median	25	0.403411547449335	0.175709921539615	0.0216818801323597							1.49692281968138	1.06079656384335	2.1123540596364	0.0325844895257191
AdYQlH	aGwo0E	outcome	RP11-517P14.7	Weighted median	100	-0.155935	0.0656779324913452	0.0175855936759491							0.855615217718046	0.752267527535999	0.973160975309633	0.0267952097083217
f6ysAr	aGwo0E	outcome	RP11-517A5.7	Weighted median	50	-0.353569	0.104040265634813	0.0006778582792972							0.702177883742647	0.572646069964292	0.861009629295191	0.0012362755674883
OxnJuI	aGwo0E	outcome	RP11-514F3.5	Weighted median	27	0.123210832323923	0.0749206377911892	0.100062376743649							1.13112287307387	0.976643469050335	1.31003687070675	0.134264407286413
I6qq8r	aGwo0E	outcome	RP11-513I15.6	Weighted median	252	0.0313646484077229	0.033045078751763	0.342545682992708							1.03186170201896	0.967148037353178	1.10090547772538	0.406328860374778
0PIDlG	aGwo0E	outcome	RP11-513G19.1	Weighted median	160	-0.111772	0.0602842407152154	0.0637277789615707							0.894248321079174	0.794590103710016	1.00640576319682	0.0885983808650197
IPoohJ	aGwo0E	outcome	RP11-511P7.2	Weighted median	66	-0.0159593	0.0582666664119189	0.784160699846179							0.984167376385894	0.877953222054038	1.10323124331865	0.826362207756362
BJ6eGg	aGwo0E	outcome	RP11-511H9.3	Weighted median	282	-0.0277071	0.016031527847111	0.08393697801272							0.97267325639164	0.942585301424582	1.00372163905976	0.114272997265278
W6HXpo	aGwo0E	outcome	RP11-511B23.1	Weighted median	146	-0.45063	0.073387417039104	8.23021194107015e-10							0.637226719119717	0.551855464235292	0.73580478562943	2.43325649625786e-09
jIHsqa	aGwo0E	outcome	RP11-510J16.5	Weighted median	54	1.36120888872447	0.161377737366555	3.3141917882507603e-17							3.90090621406541	2.84313843136333	5.35220836350106	1.45745964852192e-16
xfz4Hr	aGwo0E	outcome	RP11-510J16.3	Weighted median	148	0.334409716844371	0.0709176246283328	2.41157009156098e-06							1.39711544805771	1.21581079178092	1.60545669473973	5.56073732711258e-06
4VT5ED	aGwo0E	outcome	RP1-150O5.3	Weighted median	16	-0.86751	0.264290726477062	0.0010292455477685							0.419996037440072	0.250193708709667	0.705040395999961	0.001838315900087
gtGt0l	aGwo0E	outcome	RP11-50I19.1	Weighted median	151	-0.140852	0.0471513299882673	0.002815243600963							0.868618262693538	0.791941193588769	0.952719333699073	0.0047733630647759
zZZslT	aGwo0E	outcome	RP11-505E24.3	Weighted median	69	-0.169384	0.0473075784778983	0.0003429497412051							0.844184388972185	0.769428542919755	0.926203335114206	0.0006454625343729
SVB0g6	aGwo0E	outcome	RP11-505E24.2	Weighted median	55	-0.223848	0.0702946997363248	0.0014504207272824							0.799436500666618	0.696542975800743	0.917529486049848	0.0025448426746434
86law6	aGwo0E	outcome	RP11-504I13.3	Weighted median	23	0.0536163030976311	0.0795010015005089	0.500050425618695							1.05507969366877	0.902843853848672	1.23298525569712	0.565580511844144
TDZpBs	aGwo0E	outcome	RP11-503N18.5	Weighted median	67	0.399904687528279	0.0808896799232147	7.66031830318736e-07							1.49168251491797	1.27298038997241	1.74795836828265	1.84228753350387e-06
3YcS0N	aGwo0E	outcome	RP11-501J20.5	Weighted median	10	-0.229937	0.238788723026623	0.335582145042521							0.794583606590342	0.49759789694236	1.26882189764409	0.399276641576409
N2VV1b	aGwo0E	outcome	RP11-4C20.3	Weighted median	32	-0.337555	0.145254775799815	0.020131789929442							0.713512703081462	0.536733062224742	0.948516894689529	0.0304019935771909
6rSRyl	aGwo0E	outcome	RP11-49K24.8	Weighted median	157	0.0980297716938031	0.060190828964565	0.103387210157699							1.10299562266763	0.980253317890091	1.24110709081055	0.138365886748139
UWk8Hn	aGwo0E	outcome	RP11-49C24.1	Weighted median	65	0.110475425361922	0.0891388421467868	0.215210920640005							1.11680890354028	0.937782995102616	1.33001145631817	0.269145763926238
hMPNSW	aGwo0E	outcome	RP1-149A16.3	Weighted median	106	-0.351228	0.0776507102256243	6.09196560051282e-06							0.703823595551641	0.604458102445597	0.819523556142296	1.35629281911733e-05
V6DdRD	aGwo0E	outcome	RP11-498E2.9	Weighted median	104	-0.318646	0.0648783551720952	9.04144629084962e-07							0.727133261914751	0.640307281497843	0.825732887725356	2.1600395140328e-06
N8fPPp	aGwo0E	outcome	RP11-498C9.15	Weighted median	3	0.175281190384968	0.367467114997417	0.633363329811429							1.19158123069376	0.579868250816316	2.4486007422252	0.691508068303698
2JS6hn	aGwo0E	outcome	RP11-497H16.7	Weighted median	66	0.154417409868049	0.0324894803461398	2.00575772696682e-06							1.16697789321915	1.09498211345375	1.24370744191131	4.65781935627252e-06
1Nx8cm	aGwo0E	outcome	RP11-497H16.6	Weighted median	109	-0.0700835	0.0624516767672095	0.261775878810867							0.932315971058012	0.824903570702559	1.05371476225948	0.320349609633224
cMthnX	aGwo0E	outcome	RP11-497H16.2	Weighted median	64	0.339234712029979	0.0925335188344918	0.0002463028409358							1.40387281238389	1.17101279968404	1.68304	0.0004708287900771
LZmbOl	aGwo0E	outcome	RP11-496N12.6	Weighted median	205	-0.235607	0.0399115952079499	3.5648894170003e-09							0.790091388552109	0.730640753648958	0.854379391166734	1.01129045000325e-08
kVGjX7	aGwo0E	outcome	RP11-496I9.1	Weighted median	362	-0.110587	0.035443759353563	0.0018081087998415							0.895308571201478	0.835222922950965	0.95971676020905	0.0031363364712815
fK9cHv	aGwo0E	outcome	RP11-496H1.1	Weighted median	347	-0.10209	0.0253914942169564	5.80437780686324e-05							0.90294855975872	0.859111106128216	0.949022886276908	0.0001180979682848
FjSN2Q	aGwo0E	outcome	RP11-493L12.5	Weighted median	300	0.106654109887239	0.0309332585841812	0.0005650086343103							1.11254936809258	1.04710050758286	1.18208909983291	0.0010386277790077
tJ5pAX	aGwo0E	outcome	RP11-493L12.4	Weighted median	499	0.0016964659439855	0.0085524712927538	0.842763617840567							1.00169790575642	0.985046552219953	1.01863073591342	0.875478336206984
vRXv9w	aGwo0E	outcome	RP11-492E3.51	Weighted median	53	-0.0139308	0.0540496404721539	0.79660728559001							0.986165809743261	0.887037456024035	1.09637197133221	0.837175641472979
TmXLgw	aGwo0E	outcome	RP11-490K7.4	Weighted median	163	-0.0611264	0.0451809262875073	0.176079905839077							0.940704364596821	0.860982606898471	1.02780787263437	0.224672648075002
R87s4c	aGwo0E	outcome	RP1-148H17.1	Weighted median	165	0.0388840130484939	0.0314758588440161	0.216696599113729							1.03964989083522	0.977449481013511	1.10580844995994	0.270852930702481
bTZ5sA	aGwo0E	outcome	RP11-48B14.2	Weighted median	127	0.0206525752671263	0.0505368492405042	0.682786484202002							1.02086731546466	0.924594839067099	1.12716406338106	0.73630709593625
Se0XJw	aGwo0E	outcome	RP11-488L18.8	Weighted median	328	0.284179970885681	0.0217023141368205	3.54208714658136e-39							1.32867203151885	1.27334008358045	1.3864083838282	3.47822960251558e-38
O0ySgc	aGwo0E	outcome	RP11-488L18.4	Weighted median	415	-0.106654	0.0318958090202743	0.0008262998534215							0.898836434526726	0.844365358940755	0.956821507985863	0.0014914757639233
0MnPGr	aGwo0E	outcome	RP11-488L18.10	Weighted median	380	0.220493084955122	0.0196199278862812	2.64662079578103e-29							1.24669130378211	1.19965981163403	1.29556661968107	1.89028490926659e-28
CAll5r	aGwo0E	outcome	RP11-488C13.6	Weighted median	311	-0.038671	0.0193830429659264	0.046032639850147							0.962067186103798	0.926203084243611	0.999320004784431	0.0656528914378825
wLD5Yt	aGwo0E	outcome	RP11-488C13.5	Weighted median	195	0.222924744621539	0.0627346892698376	0.0003802097096479							1.24972652155471	1.10513196552407	1.41323971018846	0.0007124677699035
1HsGnU	aGwo0E	outcome	RP11-486O12.2	Weighted median	853	-0.0727549	0.012448435716796	5.080803600810311e-09							0.929828675037071	0.90741637649611	0.952794535469685	1.42601375008994e-08
8diXjW	aGwo0E	outcome	RP11-484L8.1	Weighted median	232	0.204584637592089	0.0304428197253099	1.8136076222334098e-11							1.22701530307172	1.15594328881754	1.30245710887104	5.921071726222379e-11
q87RKJ	aGwo0E	outcome	RP11-483P21.2	Weighted median	448	-0.00457128	0.032520687728336	0.888213434548896							0.995439155120846	0.933969193023544	1.06095481408746	0.912843942313691
v3tM9P	aGwo0E	outcome	RP11-483I13.5	Weighted median	203	0.167758969555801	0.0300523281093371	2.37455794328797e-08							1.18265152127008	1.11500223172983	1.25440522086894	6.37971971243505e-08
2QK9IB	aGwo0E	outcome	RP11-481J2.2	Weighted median	27	-0.479586	0.11522254310521	3.15111452549322e-05							0.619039414783728	0.493899848648303	0.775885633705987	6.57298222018838e-05
Al7tMI	aGwo0E	outcome	RP11-480N24.3	Weighted median	3	-0.0476465	0.802182935280899	0.952636608786494							0.953470733228182	0.197913521933012	4.59345288913809	0.963933851873651
QXtB5c	aGwo0E	outcome	RP11-480A16.1	Weighted median	722	0.0519393689395742	0.0217864111569838	0.0171243961027706							1.0533118771612	1.00928080512256	1.09926385693437	0.0261352036041142
OuIBIg	aGwo0E	outcome	RP11-47I22.3	Weighted median	83	-0.75879	0.16815761289138	6.4105651892469e-06							0.46823253153913	0.336761886888066	0.651028848951707	1.42408000379677e-05
DZw9ev	aGwo0E	outcome	RP11-47I22.2	Weighted median	196	0.261094462477061	0.0370471147303857	1.81987060802894e-12							1.29835030502708	1.20741549131342	1.39613374740638	6.289846624349639e-12
Zf7eSP	aGwo0E	outcome	RP11-47G11.3	Weighted median	53	0.281647482392303	0.113481423618914	0.013069061084278							1.32531144201078	1.0610127665247	1.65544701604098	0.0202658848283558
xOgs49	aGwo0E	outcome	RP11-47G11.2	Weighted median	151	-0.0251183	0.0331702758795604	0.448898834097417							0.975194577224124	0.913810552274011	1.0407019935158	0.515060248064535
yPHTYb	aGwo0E	outcome	RP11-477D19.2	Weighted median	461	0.0978548128366309	0.0140602260599296	3.4102262762138197e-12							1.10280266069472	1.07282651648267	1.13361637669309	1.1594206092064598e-11
niLThe	aGwo0E	outcome	RP11-474I16.1	Weighted median	155	0.327849511232431	0.065174517658858	4.89629313544839e-07							1.3879800811601	1.2215340130255	1.57710606921673	1.19370099570942e-06
DGdtD1	aGwo0E	outcome	RP11-473O4.4	Weighted median	12	-0.404856	0.198725616883339	0.0416239361665385							0.667072952480762	0.451871209672343	0.984763610529791	0.0597271869190364
CbJPvj	aGwo0E	outcome	RP11-473O4.3	Weighted median	83	-0.332954	0.0485217933514083	6.79321633875893e-12							0.716803469587108	0.651774724116664	0.788320250848126	2.2706716291184497e-11
xr7hx2	aGwo0E	outcome	RP11-473M20.5	Weighted median	153	0.0236362598356333	0.0424681292442241	0.577824906191654							1.02391781011416	0.942140114948664	1.11279380342074	0.639893385949346
L7ZwPJ	aGwo0E	outcome	RP11-473I1.9	Weighted median	110	-0.111646	0.0571190574628674	0.0506276450048883							0.894360631493032	0.799635286736066	1.00030720558813	0.0716089540247508
Rkww4h	aGwo0E	outcome	RP11-473I1.5	Weighted median	11	0.16332442760104	0.211361484051673	0.439684798309609							1.17741861482822	0.778065878899272	1.78174449251677	0.505886349873995
8hevhA	aGwo0E	outcome	RP11-473I1.10	Weighted median	43	0.216218155998667	0.16342900110029	0.185832147444496							1.24137316246506	0.901132758809307	1.71007802504558	0.235934045543803
VZcxgC	aGwo0E	outcome	RP11-472N13.3	Weighted median	86	-0.0390815	0.0788233622409563	0.620027354226126							0.961672295279283	0.824007764862104	1.1223360300039	0.679007868091973
gXIU3B	aGwo0E	outcome	RP11-46F15.2	Weighted median	16	-0.603675	0.184340733888628	0.0010574468842805							0.546798371894611	0.380989680290555	0.78476786898422	0.0018862989140318
j5CRIX	aGwo0E	outcome	RP11-46A10.5	Weighted median	21	0.244372307635367	0.152071535439625	0.10806396090688							1.27681961169897	0.947727844479185	1.72018615926075	0.14408625339206
a0n32W	aGwo0E	outcome	RP11-469M7.1	Weighted median	21	0.315455403873385	0.168097067693903	0.0605693092017331							1.3708834744672	0.986082901999784	1.90584533689407	0.0845379585968251
p3zl7U	aGwo0E	outcome	RP11-468E2.9	Weighted median	148	0.145079607544873	0.149450659392129	0.331671520363952							1.1561316034032	0.862565936516379	1.54960940120811	0.395204363631854
gZN1P2	aGwo0E	outcome	RP11-466L17.1	Weighted median	23	-0.580907	0.288476117352115	0.0440401238932519							0.559390839883437	0.317804119231277	0.984625726382657	0.0629802072800996
OvKCRh	aGwo0E	outcome	RP11-466C23.5	Weighted median	40	-0.376922	0.132572200092684	0.0044670593149572							0.685969488900893	0.529001695911094	0.889513480467245	0.0073872307470319
z9KVGN	aGwo0E	outcome	RP11-465N4.4	Weighted median	262	0.0579678183991399	0.0132009209043504	1.12729362247949e-05							1.05968089293401	1.03261458037694	1.08745665245161	2.44938588342149e-05
eIu8lX	aGwo0E	outcome	RP11-464F9.9	Weighted median	172	-0.373288	0.0432187583585462	5.76193903698133e-18							0.688466899044542	0.632549497031422	0.749327401736061	2.63230140784158e-17
1El1YF	aGwo0E	outcome	RP11-464F9.20	Weighted median	649	0.447662440397545	0.0966508409823756	3.62589495702264e-06							1.56465044371852	1.29463239769634	1.89098543755334	8.2415499683363e-06
idwbkU	aGwo0E	outcome	RP11-464D20.6	Weighted median	223	0.0542864696705635	0.0126697038282629	1.82947633431559e-05							1.05578700979458	1.02989190503589	1.08233320856343	3.89912076549581e-05
i15TLS	aGwo0E	outcome	RP11-463M16.4	Weighted median	44	0.0368543087766066	0.0566794489765552	0.515547873880475							1.03754184908491	0.928451242933644	1.15945031771525	0.580676020548929
UMmVHa	aGwo0E	outcome	RP11-462L8.1	Weighted median	4	0.112966278943755	0.516503287310895	0.826873175971388							1.11959417841377	0.406821744294202	3.0811802513474	0.862407543582753
EaKVXT	aGwo0E	outcome	RP11-456D7.1	Weighted median	33	0.407279743579128	0.153551084709044	0.0079920493087509							1.5027244243774	1.11217729108542	2.0304143176818	0.0127843288434212
7Yib9S	aGwo0E	outcome	RP11-452L6.5	Weighted median	17	0.140235169757296	0.376050973579961	0.709211468254454							1.15054434027766	0.550557026143624	2.40438722255019	0.759926564138611
RfWM92	aGwo0E	outcome	RP11-452L6.1	Weighted median	9	-0.37883	0.343500685228136	0.270092530031379							0.684662298514459	0.349206828609318	1.3423633921304	0.329303584924487
ctn9wu	aGwo0E	outcome	RP11-452K12.7	Weighted median	39	0.251107393206041	0.0779147546855489	0.0012692298894447							1.28544812531411	1.10339796110204	1.49753483432506	0.0022438276696452
cpSSit	aGwo0E	outcome	RP11-452K12.3	Weighted median	220	-0.195819	0.0416814946821335	2.62735483042098e-06							0.822160862493035	0.757664247904747	0.892147789320358	6.04138751162614e-06
LPr1PO	aGwo0E	outcome	RP11-452H21.4	Weighted median	578	0.157708637398799	0.0106306473555655	8.664077059983299e-50							1.17082501038533	1.14668201589425	1.19547632730139	1.12877478637752e-48
YoIxCf	aGwo0E	outcome	RP11-44N21.1	Weighted median	122	-0.73837	0.0636752650468668	4.32451467649345e-31							0.477892216291265	0.421821272162643	0.541416437395125	3.2893610248315e-30
f8Tsj6	aGwo0E	outcome	RP11-44F14.11	Weighted median	278	0.0086235882129428	0.0157707325212701	0.584509535202576							1.00866087846463	0.977959473907042	1.04032610234904	0.646209653305573
IGBwbn	aGwo0E	outcome	RP11-445F6.2	Weighted median	93	0.0096822094571823	0.0372284909491362	0.794805721224405							1.0097292336908	0.938675318931488	1.08616164163172	0.835708500742892
3zcOFE	aGwo0E	outcome	RP11-443P15.2	Weighted median	148	0.054469577749455	0.0630401924071152	0.387563042672499							1.05598035062626	0.933243431640653	1.19485920082867	0.45315670257383
YZEySy	aGwo0E	outcome	RP11-440L14.1	Weighted median	19	-0.932169	0.296937534390293	0.0016936636226461							0.393699004470339	0.219991542381103	0.704567568567809	0.0029491070051313
CC6lfH	aGwo0E	outcome	RP11-439L18.3	Weighted median	16	0.370562714895599	0.146146342983545	0.0112267928046968							1.44854950575004	1.08775493842797	1.92901507175979	0.0175846436362334
C0U4pW	aGwo0E	outcome	RP11-438N16.2	Weighted median	53	0.231572823059678	0.0845329370333886	0.0061544137466942							1.26058112260946	1.0681073670964	1.48773879446139	0.0099982407868443
Af0t6f	aGwo0E	outcome	RP11-436I9.4	Weighted median	253	0.0311289911044222	0.0259523665386531	0.230346650527418							1.03161856492252	0.980455864800085	1.08545106587721	0.286061576531661
8U5i9J	aGwo0E	outcome	RP11-434C1.1	Weighted median	1475	-0.0380355	0.00397408640251	1.06008600488439e-21							0.962678795036011	0.955209416407635	0.970206581397952	5.69812086816489e-21
c1e5q5	aGwo0E	outcome	RP11-433J8.1	Weighted median	134	-0.120178	0.0660186037015598	0.0687035351452988							0.88676265544298	0.779132329171789	1.00926117123668	0.0949973619967868
5FdGxY	aGwo0E	outcome	RP11-432J22.2	Weighted median	185	0.0313457487388441	0.0254782700485138	0.21858723649712							1.03184220035875	0.981580098290409	1.08467798837359	0.272960348464652
eEtl2h	aGwo0E	outcome	RP11-430H10.1	Weighted median	233	-0.299176	0.037516740884137	1.5303179057959602e-15							0.741428717016561	0.688865616986905	0.798002584047207	6.2198515425782e-15
0HWRf2	aGwo0E	outcome	RP11-430C7.4	Weighted median	158	0.190824500987017	0.0486178289860296	8.67332787067913e-05							1.21024703628213	1.10024574145248	1.33124613315574	0.0001736458164999
asoYt1	aGwo0E	outcome	RP11-42I10.1	Weighted median	27	-0.594146	0.158301965060222	0.0001745594681177							0.552033690332221	0.404777375604868	0.75286123589894	0.0003389177207082
mxO0Wy	aGwo0E	outcome	RP11-429E11.3	Weighted median	234	0.237936982124131	0.0343055258558479	4.0386909451861095e-12							1.26862924398561	1.18613266255224	1.35686353601668	1.3678168832866898e-11
awhvkx	aGwo0E	outcome	RP11-428G5.5	Weighted median	854	-0.066111	0.0138810182873736	1.91031229292083e-06							0.936026999700236	0.910904011886733	0.961842886555177	4.44432108345503e-06
s620x8	aGwo0E	outcome	RP11-426C22.6	Weighted median	439	0.0460082618879414	0.0142243360474422	0.0012186651267332							1.04708306180412	1.01829388313047	1.07668616740245	0.002158839402467
ulBiGM	aGwo0E	outcome	RP11-426C22.5	Weighted median	345	-0.00368879	0.0125493900474108	0.768802503395979							0.996318007006271	0.972110699426163	1.02112812015227	0.813213790285228
fAEjhD	aGwo0E	outcome	RP11-425M5.5	Weighted median	78	0.138660382282468	0.0656729005400042	0.034739749642184							1.1487339033622	1.00999107807401	1.30653587876254	0.05048678742051
HfKDDQ	aGwo0E	outcome	RP11-425D10.10	Weighted median	148	-0.346244	0.110579485675812	0.0017410445097863							0.707339554516921	0.569509254973898	0.8785269791746	0.0030267021576809
AUyCB9	aGwo0E	outcome	RP11-423H2.3	Weighted median	329	-0.0454135	0.0275932416414472	0.0998010647487208							0.95560228093737	0.905293362606117	1.00870696400987	0.133947458550383
AqpJEH	aGwo0E	outcome	RP11-423G4.9	Weighted median	118	0.0659005501671485	0.0685265092208151	0.336210542074977							1.06812048747987	0.933876190486419	1.22166234389165	0.399956883385829
daAxP1	aGwo0E	outcome	RP11-422J8.1	Weighted median	1499	-0.0479177	0.0107624948035249	8.49605454080629e-06							0.953212219354378	0.933315289495593	0.973533322932657	1.86737813088692e-05
kDWmSh	aGwo0E	outcome	RP11-421L21.2	Weighted median	41	1.43563084277276	0.157575811922394	8.182870065949941e-20							4.20229516031646	3.08571146466319	5.72292154229223	4.04581995464496e-19
b29Z5O	aGwo0E	outcome	RP11-420A23.1	Weighted median	56	1.78151908211944	0.240188124422365	1.19638310692802e-13							5.9388712028127	3.70895571385546	9.50946678382811	4.4177378452474e-13
ZTYPtR	aGwo0E	outcome	RP11-417F21.1	Weighted median	6	-0.40788	0.252159801283136	0.105760416073108							0.665058583725028	0.405711340234342	1.09019116776687	0.141289395220654
5G4zcI	aGwo0E	outcome	RP11-414H23.3	Weighted median	56	0.281374278116723	0.155831481283738	0.0709758719622158							1.32494941071485	0.976231600427294	1.79823203857082	0.0978954995407154
ofekl5	aGwo0E	outcome	RP11-413M3.4	Weighted median	14	-0.111496	0.362810909326544	0.75860709004348							0.894495344938382	0.439285839647517	1.82141523787439	0.804220211356366
NnnnZ9	aGwo0E	outcome	RP11-413E1.4	Weighted median	8	0.159135699663071	0.192492305599122	0.408400316053418							1.17249704333952	0.804005459574075	1.70987559881522	0.474310047815765
sL9YKi	aGwo0E	outcome	RP11-411B10.2	Weighted median	143	0.0101062874736271	0.031318529168023	0.746927334607397							1.01015752847015	0.950014501567941	1.07410805902518	0.793745856258668
AgIRdQ	aGwo0E	outcome	RP1-140A9.1	Weighted median	463	0.123441834988355	0.0083846090628749	4.62717009847475e-49							1.13138419565329	1.11294315935246	1.15013079277005	5.9145170601539e-48
H4yzyw	aGwo0E	outcome	RP11-408H20.1	Weighted median	94	-0.763346	0.0710141154839531	5.97720488247552e-27							0.466104433978844	0.40554102909119	0.535712363953899	3.92205940774257e-26
3Fr77h	aGwo0E	outcome	RP11-405F3.4	Weighted median	58	0.0948149197673925	0.0844942517634301	0.261800201452466							1.09945534884248	0.931653966619917	1.2974796516822	0.320371438714824
jh6b4J	aGwo0E	outcome	RP11-403I13.4	Weighted median	8	-0.323014	0.368778395463349	0.381082811995585							0.723963665652529	0.351403645689339	1.49151380645721	0.446435563800192
xJoHpV	aGwo0E	outcome	RP11-401P9.5	Weighted median	8	0.231605373295273	0.622326875233611	0.70977348251784							1.2606221554898	0.372262770350372	4.26894211692463	0.760462792384057
OmYRtz	aGwo0E	outcome	RP11-400N9.1	Weighted median	39	0.0321160088612201	0.164895568547461	0.845576337350909							1.03263729343321	0.747456398270251	1.42662472654828	0.877808060563302
o7s3zh	aGwo0E	outcome	RP11-400L8.2	Weighted median	220	0.248029601829505	0.0237055373662535	1.2782740797542e-25							1.28149786631391	1.22331788908394	1.34244483467569	8.01199877722617e-25
7Ne6XH	aGwo0E	outcome	RP11-3D4.3	Weighted median	16	0.443933200871367	0.144466974726097	0.0021198639457213							1.55882635390187	1.17442413596497	2.06904773770034	0.003646886461346
C6S7Si	aGwo0E	outcome	RP11-399O19.5	Weighted median	78	-0.386189	0.0495471108431699	6.472200034602571e-15							0.679641825202129	0.616743733293314	0.748954526213892	2.55245548263328e-14
HKkldP	aGwo0E	outcome	RP11-396K3.1	Weighted median	9	0.0444127462841984	0.611396192124634	0.942091388963054							1.04541375649606	0.315396787406562	3.46512699529311	0.955965593578067
3kKtCT	aGwo0E	outcome	RP11-395I6.3	Weighted median	527	0.0359809538131511	0.0185615193561333	0.0525658720791334							1.03664	0.999600455714215	1.07504393633225	0.0741678122558242
fpNtrs	aGwo0E	outcome	RP11-395B7.4	Weighted median	167	-0.504292	0.0539701779873519	9.285394137651981e-21							0.6039332040635	0.543311083491641	0.671319481698033	4.77989295178098e-20
v2l7Km	aGwo0E	outcome	RP11-394O4.3	Weighted median	97	0.223768999821417	0.0478533444589365	2.92323240071706e-06							1.25078205517614	1.13880155817573	1.37377380485567	6.6899731455332e-06
5jpziJ	aGwo0E	outcome	RP11-390B4.5	Weighted median	38	0.0658885401682622	0.111263846778425	0.553728162711644							1.06810765943104	0.858826291241931	1.32838733952298	0.617053491133994
bkoqCQ	aGwo0E	outcome	RP11-38P22.2	Weighted median	25	-1.09926	0.28489627033544	0.0001141010896933							0.333116673527685	0.190584584607864	0.582243933371994	0.0002255766991124
98basv	aGwo0E	outcome	RP11-38G5.4	Weighted median	13	-0.866257	0.243409317906941	0.0003724837924041							0.420522634362538	0.26097276210505	0.677615872954685	0.0006985467409232
uNDppd	aGwo0E	outcome	RP11-38G5.2	Weighted median	379	0.0611320362092508	0.0158185808938511	0.0001112844087256							1.06303926459611	1.03058604653858	1.09651443648837	0.0002202372969703
WVe06N	aGwo0E	outcome	RP11-389O22.1	Weighted median	79	-0.827308	0.0863172534539113	9.290263272066819e-22							0.437224672606492	0.369173000851456	0.517820679992722	5.0067293163512304e-21
7bKs0V	aGwo0E	outcome	RP11-388C12.8	Weighted median	156	-0.0627838	0.0357027066981064	0.078659584440759							0.939146480113596	0.875674247133532	1.00721942434292	0.107607217625975
RUYJV2	aGwo0E	outcome	RP11-387H17.4	Weighted median	127	-0.190895	0.0424282015891539	6.81935337106764e-06							0.826219255744827	0.760290734841827	0.897864760518954	1.51115329053043e-05
L7nJtc	aGwo0E	outcome	RP11-386I23.1	Weighted median	338	-0.200288	0.0541279414723593	0.0002153703250985							0.818495000738282	0.73610776192728	0.910103249664881	0.0004139732383021
gHw8M7	aGwo0E	outcome	RP11-384P7.7	Weighted median	1237	0.188896586094935	0.0116064332508149	1.48125992089983e-59							1.20791603070996	1.18074781222489	1.23570937175551	2.4449944494558802e-58
dHNhrT	aGwo0E	outcome	RP11-384M15.3	Weighted median	14	-0.332083	0.144581187123995	0.0216266293951642							0.717427723689997	0.540391070600167	0.952463071137304	0.0325054115430739
lnERYe	aGwo0E	outcome	RP11-384K6.6	Weighted median	2716	0.169984623108576	0.006877574598079	7.2371302710945e-135							1.18528662515649	1.16941611460313	1.20137251935481	4.61336705526298e-133
NNLHzb	aGwo0E	outcome	RP11-383J24.5	Weighted median	136	0.0139815912595153	0.0686251926972125	0.838557883691062							1.01407979083496	0.886456001473614	1.16007768064109	0.872210593860858
AgO6ax	aGwo0E	outcome	RP11-383H13.1	Weighted median	321	0.171239480707172	0.0415713300848597	3.80235384875186e-05							1.18677492469128	1.09391135648817	1.2875218028612	7.86994374250653e-05
I5KkFc	aGwo0E	outcome	RP11-383F6.1	Weighted median	127	-0.0483619	0.0437063401514986	0.268501967326627							0.952788916533897	0.874567045497464	1.03800700488716	0.327598792122629
uVdpL6	aGwo0E	outcome	RP11-382A20.6	Weighted median	290	0.305200257837462	0.0371023642760449	1.9373410502337099e-16							1.35689670499989	1.26172473701265	1.45924749989355	8.23315784126418e-16
lHW4sN	aGwo0E	outcome	RP11-380G5.4	Weighted median	4	0.486658524737795	0.372592659114101	0.191504633946179							1.62687097832296	0.783782996498377	3.3768392424101	0.242351130458606
Z0jx05	aGwo0E	outcome	RP11-379F4.4	Weighted median	388	-0.158733	0.0630034955263087	0.0117546190084071							0.853224417510985	0.754108120561945	0.965368077583458	0.0183531949961233
MJFw3x	aGwo0E	outcome	RP11-378J18.3	Weighted median	294	0.125228021682028	0.0280751585112792	8.17852800404135e-06							1.13340686494372	1.07272346704809	1.1975230904909	1.79966958702799e-05
pPYHXW	aGwo0E	outcome	RP11-374P20.4	Weighted median	4	0.0988893327616996	0.263698818305486	0.707654047948687							1.10394412235124	0.658388332269249	1.85102403177987	0.758570376262481
rLwwcq	aGwo0E	outcome	RP11-373L24.1	Weighted median	190	-0.00471224	0.0358513516898867	0.895428522376582							0.995298841308051	0.92776121270112	1.06775	0.918787365588101
W7y7Wv	aGwo0E	outcome	RP11-370I10.4	Weighted median	1429	0.0038242851638635	0.0056928845176748	0.501732799659878							1.00383160707309	0.992693057969616	1.01509513667796	0.567275557880694
HhVgJR	aGwo0E	outcome	RP11-36B15.1	Weighted median	180	-0.100527	0.0341410136896138	0.0032350841784229							0.904360525238293	0.84582434257785	0.966947767330313	0.005444670697916
37ognI	aGwo0E	outcome	RP11-366M4.11	Weighted median	281	0.0987299670450645	0.0273083140569915	0.0002999059091035							1.10376820552299	1.04624302014617	1.16445627647124	0.0005682167450601
l5czec	aGwo0E	outcome	RP11-365O16.6	Weighted median	83	-0.232465	0.101216379977699	0.0216352716169165							0.792577682952496	0.649957137783726	0.966493553184694	0.0325174117338158
T6TiBu	aGwo0E	outcome	RP11-363E7.4	Weighted median	60	0.887262831303761	0.1354148081548	5.6701356816124894e-11							2.42847340442812	1.86236988293614	3.16665509362563	1.7942717978395e-10
wkcka0	aGwo0E	outcome	RP11-359J14.2	Weighted median	119	0.0321198752578478	0.113596099895328	0.777364584222202							1.03264128602627	0.826522217597245	1.29016256659856	0.820583802789031
MPCuBo	aGwo0E	outcome	RP11-359B12.1	Weighted median	86	-0.361399	0.19037550684883	0.0576501219710988							0.696700851515489	0.4797284097863	1.01180598563806	0.0807785176623233
QFFnVu	aGwo0E	outcome	RP11-356M20.1	Weighted median	63	-0.241949	0.0712171243011166	0.0006804436288833							0.78509638441671	0.682812931255961	0.902701610659939	0.0012405785362852
FN5kVD	aGwo0E	outcome	RP11-356I2.2	Weighted median	320	-0.164642	0.0275637409679159	2.3272656799401603e-09							0.848197176913191	0.803589202477223	0.895281380966414	6.68336373807382e-09
2l2hQi	aGwo0E	outcome	RP11-355O1.11	Weighted median	68	1.00100871902853	0.131302393046604	2.46525314038535e-14							2.72102519447446	2.10361233959421	3.51964949511231	9.43676591464881e-14
nJ1Oji	aGwo0E	outcome	RP11-355N15.1	Weighted median	71	0.198079631604933	0.0679105323313475	0.0035367265697967							1.21905946561836	1.06713233318778	1.39261639301506	0.0059250874131937
RTOn5i	aGwo0E	outcome	RP11-352G18.2	Weighted median	16	0.236478884117542	0.180867355170957	0.191052680692999							1.26678080614311	0.88867727287248	1.80575520472758	0.241872116041213
61MVUd	aGwo0E	outcome	RP11-350G8.5	Weighted median	7	1.01150333982756	0.521808494917143	0.0525674896812264							2.7497316904999	0.988821637226231	7.64649971753155	0.0741679763736006
90H4xi	aGwo0E	outcome	RP11-34F13.2	Weighted median	38	-0.633925	0.138096754071362	4.42308046561309e-06							0.530505390309617	0.40470583943842	0.6954087184363	9.96867902566986e-06
6Jzxaz	aGwo0E	outcome	RP11-349I1.2	Weighted median	107	-0.100059	0.0443886019175537	0.0241856708063655							0.904783747571163	0.8293931613062	0.987027224313815	0.0360816758220406
2cNL5s	aGwo0E	outcome	RP11-349A22.5	Weighted median	673	0.0639539630201721	0.0349409369110283	0.0671983927049172							1.06604332021697	0.995479972884209	1.1416084617821	0.0930881360177502
AvqygL	aGwo0E	outcome	RP11-347I19.3	Weighted median	257	-0.680562	0.0691383326458192	7.31347586697853e-23							0.506332381316948	0.442164595922646	0.579812320421381	4.1165278370324696e-22
E65Y36	aGwo0E	outcome	RP11-347C18.3	Weighted median	30	0.437433146076048	0.111393547950924	8.60418842281143e-05							1.54872675671226	1.24495799711713	1.92661485167425	0.0001723244499339
d4LmDE	aGwo0E	outcome	RP11-347C12.3	Weighted median	13	-0.442454	0.267954090165029	0.098691530477856							0.642457925987017	0.379977223610349	1.08625507271667	0.132587977053749
6hvAH7	aGwo0E	outcome	RP11-345P4.7	Weighted median	76	0.0662416760606143	0.0238454130774536	0.005470084091193							1.06848491318948	1.01969612518893	1.11960806902352	0.0089477042698235
v4jHI1	aGwo0E	outcome	RP11-345P4.6	Weighted median	64	0.112422956972151	0.0385489504315794	0.0035413160845073							1.11898604351884	1.03755503150062	1.20680805121149	0.0059323738945074
e3gD15	aGwo0E	outcome	RP11-343H19.1	Weighted median	33	0.364065330960184	0.0735361513611941	7.38958446519559e-07							1.43916823332938	1.24599508320272	1.66229002966895	1.77916877690949e-06
yXlU06	aGwo0E	outcome	RP11-341G23.4	Weighted median	423	-0.121809	0.0181703532790415	2.0314280513294897e-11							0.885317059390944	0.854342312359221	0.917414816415031	6.613855280073219e-11
dgdfMr	aGwo0E	outcome	RP11-340F14.5	Weighted median	694	0.186942334007804	0.0275987347789165	1.2563102757607298e-11							1.20555776336085	1.14207731899487	1.2725666613174	4.1368723957480094e-11
MkZUMa	aGwo0E	outcome	RP11-33I11.2	Weighted median	79	1.29554176781424	0.123618883619141	1.06598964477115e-25							3.65297	2.86695002581444	4.65450133180788	6.70781893015276e-25
s2dtZD	aGwo0E	outcome	RP11-337C18.8	Weighted median	18	0.44403610464866	0.263425429910004	0.0918683329888683							1.55898677127547	0.930272487931079	2.61261058941685	0.124160728091291
9LZb6Q	aGwo0E	outcome	RP11-335O4.3	Weighted median	54	0.18703171214718	0.0930110327083106	0.0443407611053576							1.20566551868606	1.00474129256448	1.44676978412853	0.0633844508358791
ty3Cw0	aGwo0E	outcome	RP11-335G20.7	Weighted median	153	-0.0666112	0.0308756214966158	0.0309740851010003							0.935558843344029	0.880621427638228	0.993923520242562	0.0454244285998967
kf9OON	aGwo0E	outcome	RP11-333E1.2	Weighted median	68	-0.0367251	0.0877658715424748	0.675622142991162							0.96394104018254	0.81160114835704	1.14487557198407	0.729951465909819
mEeEvK	aGwo0E	outcome	RP11-333E1.1	Weighted median	723	0.0045698733202902	0.0322051233329251	0.887159820399625							1.00458033111557	0.943129037571831	1.07003559583161	0.91196979977117
5K0vZB	aGwo0E	outcome	RP11-332H18.3	Weighted median	8	-0.604611	0.462543166073042	0.191163800530115							0.546287143589103	0.220646116659592	1.35252615259552	0.241987988766476
sslmvR	aGwo0E	outcome	RP11-331F9.3	Weighted median	25	0.302811446121964	0.168087671102445	0.0716226958113918							1.35365920268554	0.97371133564633	1.88186495312695	0.0987352747487287
5UJZjB	aGwo0E	outcome	RP11-330M2.7	Weighted median	37	0.446250412789551	0.143808637327188	0.0019151468260399							1.56244267317843	1.17866858497295	2.07117347326686	0.0033122352055611
pdD2dR	aGwo0E	outcome	RP11-326C3.7	Weighted median	279	0.133828658088771	0.0216281863403772	6.10496303159082e-10							1.14319692531658	1.09574819480251	1.19270030856754	1.8211671315118701e-09
zYvQfe	aGwo0E	outcome	RP11-326C3.2	Weighted median	212	-0.120752	0.0379148267045548	0.0014484737549826							0.886254035157483	0.822781415449661	0.954623184340721	0.0025419682752799
wni0HA	aGwo0E	outcome	RP11-326C3.14	Weighted median	25	-0.775873	0.131978724833447	4.1331472231601906e-09							0.460301681649995	0.355385744410259	0.596190594199019	1.16766667962362e-08
8my3wJ	aGwo0E	outcome	RP11-326C3.13	Weighted median	420	0.0106895479508796	0.0166207035911389	0.520129020475423							1.01074688528987	0.978350752028854	1.04421575187079	0.585062249511551
mBDazA	aGwo0E	outcome	RP11-326C3.12	Weighted median	485	-0.0509886	0.020730033924156	0.0139073550262729							0.950289527156647	0.912452324619814	0.989695747446171	0.0214895865245515
VFCZgs	aGwo0E	outcome	RP11-326C3.11	Weighted median	455	-0.0825795	0.0157239282680358	1.50591519775677e-07							0.920738260835935	0.892794924128797	0.949556188163186	3.81795794492341e-07
L0g93s	aGwo0E	outcome	RP11-325K4.3	Weighted median	15	0.219489246903013	0.2406796818068	0.361791952510089							1.24544045554171	0.777055945373873	1.99615219153059	0.426557391767837
f3Fxqa	aGwo0E	outcome	RP11-325F22.2	Weighted median	709	-0.0414108	0.0088049846307696	2.56234650201056e-06							0.959434945160403	0.943019293853461	0.976136352665109	5.89849514183067e-06
9fkdNT	aGwo0E	outcome	RP11-323N12.1	Weighted median	15	-0.265932	0.225277765367581	0.237816103536702							0.766491189712272	0.492886430765926	1.19197589390637	0.294206164246599
2QN7l6	aGwo0E	outcome	RP11-323F5.2	Weighted median	3	-0.0562225	0.159927901598779	0.725176274820654							0.945328733489137	0.690954549053804	1.29335050414523	0.774513220013939
prhw3o	aGwo0E	outcome	RP11-322D14.1	Weighted median	71	0.110591810771121	0.070665307049463	0.117580901072319							1.11693889136571	0.972473754955654	1.28286494179183	0.155603901735174
rCN7fO	aGwo0E	outcome	RP11-321E8.2	Weighted median	809	0.0840501287639019	0.0163290118691314	2.6427925043446e-07							1.08768341666743	1.05342342517264	1.12305762965109	6.5757682242325e-07
TbGSlH	aGwo0E	outcome	RP11-321E2.6	Weighted median	61	-1.071	0.362338488473895	0.0031185200377709							0.34266475553925	0.168438238027234	0.697104980816703	0.005258936328226
oj8KmL	aGwo0E	outcome	RP11-321E2.5	Weighted median	4	-1.00343	0.6505876808462	0.122991470780952							0.366621196770622	0.102429760387239	1.3122270462547	0.161987406851277
Wt9etM	aGwo0E	outcome	RP11-320P7.1	Weighted median	297	0.148902805106758	0.0349310094577301	2.01909709163478e-05							1.16056018320398	1.08376168013196	1.24280085145146	4.28698012798836e-05
LCa0sH	aGwo0E	outcome	RP11-320N21.1	Weighted median	475	-0.0633066	0.0389846172371825	0.104399843009929							0.93865561092805	0.869604752218678	1.01318944460546	0.13959632566161
RkeFXy	aGwo0E	outcome	RP11-320L11.2	Weighted median	198	-0.0450493	0.0346013567412077	0.19293326908716							0.955950392848307	0.893268638090374	1.02303060313462	0.243996577224887
FWk7SE	aGwo0E	outcome	RP11-31F15.2	Weighted median	127	-0.396148	0.051561124414754	1.55314308440943e-14							0.67290709950642	0.608226579926658	0.744465926860255	6.01331722563314e-14
euRwSz	aGwo0E	outcome	RP11-319G6.1	Weighted median	272	-0.119547	0.0262337768155607	5.18938007711964e-06							0.88732243043978	0.842851023362704	0.934140285456759	1.16231103028491e-05
[truncated: 17,213 more rows]
